# Supplementary material
Source: ML conference proceedings conference paper supplement (https://proceedings.neurips.cc/paper_files/paper/2022/hash/1c153788756d35559c22d105d1182c30-Abstract.html)
Supplement: Supplementary file 1 [file 1c153788756d35559c22d105d1182c30-Supplemental-Conference.zip]

Archive with 434 entries (393 files):
- Supplementary Material/
- __MACOSX/._Supplementary Material
- Supplementary Material/.DS_Store
- __MACOSX/Supplementary Material/._.DS_Store
- Supplementary Material/Simulation_Video.mp4
- __MACOSX/Supplementary Material/._Simulation_Video.mp4
- Supplementary Material/Code/
- __MACOSX/Supplementary Material/._Code
- Supplementary Material/Appendix.pdf
- __MACOSX/Supplementary Material/._Appendix.pdf
- Supplementary Material/Hardware_Video.mp4
- __MACOSX/Supplementary Material/._Hardware_Video.mp4
- Supplementary Material/Code/visualization/
- __MACOSX/Supplementary Material/Code/._visualization
- Supplementary Material/Code/.DS_Store
- __MACOSX/Supplementary Material/Code/._.DS_Store
- Supplementary Material/Code/experiments/
- __MACOSX/Supplementary Material/Code/._experiments
- Supplementary Material/Code/anaconda_env/
- __MACOSX/Supplementary Material/Code/._anaconda_env
- Supplementary Material/Code/setup.py
- __MACOSX/Supplementary Material/Code/._setup.py
- Supplementary Material/Code/.gitignore
- __MACOSX/Supplementary Material/Code/._.gitignore
- Supplementary Material/Code/scripts/
- __MACOSX/Supplementary Material/Code/._scripts
- Supplementary Material/Code/README.txt
- __MACOSX/Supplementary Material/Code/._README.txt
- Supplementary Material/Code/src/
- __MACOSX/Supplementary Material/Code/._src
- Supplementary Material/Code/visualization/test_overcooked_ma.py
- __MACOSX/Supplementary Material/Code/visualization/._test_overcooked_ma.py
- Supplementary Material/Code/visualization/policy_nns/
- __MACOSX/Supplementary Material/Code/visualization/._policy_nns
- Supplementary Material/Code/visualization/test_bp_ma.py
- __MACOSX/Supplementary Material/Code/visualization/._test_bp_ma.py
- Supplementary Material/Code/visualization/test_osd_s_policy_dec.py
- __MACOSX/Supplementary Material/Code/visualization/._test_osd_s_policy_dec.py
- Supplementary Material/Code/experiments/BoxPushing/
- __MACOSX/Supplementary Material/Code/experiments/._BoxPushing
- Supplementary Material/Code/experiments/.DS_Store
- __MACOSX/Supplementary Material/Code/experiments/._.DS_Store
- Supplementary Material/Code/experiments/Overcooked/
- __MACOSX/Supplementary Material/Code/experiments/._Overcooked
- Supplementary Material/Code/experiments/Warehouse/
- __MACOSX/Supplementary Material/Code/experiments/._Warehouse
- Supplementary Material/Code/anaconda_env/neurips22.yml
- __MACOSX/Supplementary Material/Code/anaconda_env/._neurips22.yml
- Supplementary Material/Code/scripts/ma_niacc_rnn_V.py
- __MACOSX/Supplementary Material/Code/scripts/._ma_niacc_rnn_V.py
- Supplementary Material/Code/scripts/ma_cen_condi_ddrqn.py
- __MACOSX/Supplementary Material/Code/scripts/._ma_cen_condi_ddrqn.py
- Supplementary Material/Code/scripts/ma_niacc_rnn_sV.py
- __MACOSX/Supplementary Material/Code/scripts/._ma_niacc_rnn_sV.py
- Supplementary Material/Code/scripts/ma_iac_rnn_V.py
- __MACOSX/Supplementary Material/Code/scripts/._ma_iac_rnn_V.py
- Supplementary Material/Code/scripts/ma_iaicc_rnn_V.py
- __MACOSX/Supplementary Material/Code/scripts/._ma_iaicc_rnn_V.py
- Supplementary Material/Code/scripts/ma_cac_rnn_V.py
- __MACOSX/Supplementary Material/Code/scripts/._ma_cac_rnn_V.py
- Supplementary Material/Code/scripts/ma_hddrqn.py
- __MACOSX/Supplementary Material/Code/scripts/._ma_hddrqn.py
- Supplementary Material/Code/src/macro_marl/
- __MACOSX/Supplementary Material/Code/src/._macro_marl
- Supplementary Material/Code/visualization/policy_nns/Overcooked/
- __MACOSX/Supplementary Material/Code/visualization/policy_nns/._Overcooked
- Supplementary Material/Code/visualization/policy_nns/OSD_D/
- __MACOSX/Supplementary Material/Code/visualization/policy_nns/._OSD_D
- Supplementary Material/Code/visualization/policy_nns/OSD_F/
- __MACOSX/Supplementary Material/Code/visualization/policy_nns/._OSD_F
- Supplementary Material/Code/visualization/policy_nns/BP_MA/
- __MACOSX/Supplementary Material/Code/visualization/policy_nns/._BP_MA
- Supplementary Material/Code/visualization/policy_nns/OSD_T/
- __MACOSX/Supplementary Material/Code/visualization/policy_nns/._OSD_T
- Supplementary Material/Code/experiments/BoxPushing/mac_cen_q.sh
- __MACOSX/Supplementary Material/Code/experiments/BoxPushing/._mac_cen_q.sh
- Supplementary Material/Code/experiments/BoxPushing/mac_iaicc.sh
- __MACOSX/Supplementary Material/Code/experiments/BoxPushing/._mac_iaicc.sh
- Supplementary Material/Code/experiments/BoxPushing/mac_cac.sh
- __MACOSX/Supplementary Material/Code/experiments/BoxPushing/._mac_cac.sh
- Supplementary Material/Code/experiments/BoxPushing/mac_dec_q.sh
- __MACOSX/Supplementary Material/Code/experiments/BoxPushing/._mac_dec_q.sh
- Supplementary Material/Code/experiments/BoxPushing/mac_naive_iacc.sh
- __MACOSX/Supplementary Material/Code/experiments/BoxPushing/._mac_naive_iacc.sh
- Supplementary Material/Code/experiments/BoxPushing/cac.sh
- __MACOSX/Supplementary Material/Code/experiments/BoxPushing/._cac.sh
- Supplementary Material/Code/experiments/BoxPushing/mac_iac.sh
- __MACOSX/Supplementary Material/Code/experiments/BoxPushing/._mac_iac.sh
- Supplementary Material/Code/experiments/BoxPushing/iac.sh
- __MACOSX/Supplementary Material/Code/experiments/BoxPushing/._iac.sh
- Supplementary Material/Code/experiments/Overcooked/mac_cen_q.sh
- __MACOSX/Supplementary Material/Code/experiments/Overcooked/._mac_cen_q.sh
- Supplementary Material/Code/experiments/Overcooked/mac_iaicc.sh
- __MACOSX/Supplementary Material/Code/experiments/Overcooked/._mac_iaicc.sh
- Supplementary Material/Code/experiments/Overcooked/mac_cac.sh
- __MACOSX/Supplementary Material/Code/experiments/Overcooked/._mac_cac.sh
- Supplementary Material/Code/experiments/Overcooked/mac_dec_q.sh
- __MACOSX/Supplementary Material/Code/experiments/Overcooked/._mac_dec_q.sh
- Supplementary Material/Code/experiments/Overcooked/mac_naive_iacc.sh
- __MACOSX/Supplementary Material/Code/experiments/Overcooked/._mac_naive_iacc.sh
- Supplementary Material/Code/experiments/Overcooked/cac.sh
- __MACOSX/Supplementary Material/Code/experiments/Overcooked/._cac.sh
- Supplementary Material/Code/experiments/Overcooked/mac_iac.sh
- __MACOSX/Supplementary Material/Code/experiments/Overcooked/._mac_iac.sh
- Supplementary Material/Code/experiments/Overcooked/iac.sh
- __MACOSX/Supplementary Material/Code/experiments/Overcooked/._iac.sh
- Supplementary Material/Code/experiments/Warehouse/mac_cen_q.sh
- __MACOSX/Supplementary Material/Code/experiments/Warehouse/._mac_cen_q.sh
- Supplementary Material/Code/experiments/Warehouse/mac_iaicc.sh
- __MACOSX/Supplementary Material/Code/experiments/Warehouse/._mac_iaicc.sh
- Supplementary Material/Code/experiments/Warehouse/mac_cac.sh
- __MACOSX/Supplementary Material/Code/experiments/Warehouse/._mac_cac.sh
- Supplementary Material/Code/experiments/Warehouse/mac_dec_q.sh
- __MACOSX/Supplementary Material/Code/experiments/Warehouse/._mac_dec_q.sh
- Supplementary Material/Code/experiments/Warehouse/mac_naive_iacc.sh
- __MACOSX/Supplementary Material/Code/experiments/Warehouse/._mac_naive_iacc.sh
- Supplementary Material/Code/experiments/Warehouse/mac_iac.sh
- __MACOSX/Supplementary Material/Code/experiments/Warehouse/._mac_iac.sh
- Supplementary Material/Code/src/macro_marl/MA_cen_condi_ddrqn/
- __MACOSX/Supplementary Material/Code/src/macro_marl/._MA_cen_condi_ddrqn
- Supplementary Material/Code/src/macro_marl/MA_niacc_rnn_sV/
- __MACOSX/Supplementary Material/Code/src/macro_marl/._MA_niacc_rnn_sV
- Supplementary Material/Code/src/macro_marl/MA_iaicc_rnn_V/
- __MACOSX/Supplementary Material/Code/src/macro_marl/._MA_iaicc_rnn_V
- Supplementary Material/Code/src/macro_marl/MA_hddrqn/
- __MACOSX/Supplementary Material/Code/src/macro_marl/._MA_hddrqn
- Supplementary Material/Code/src/macro_marl/__init__.py
- __MACOSX/Supplementary Material/Code/src/macro_marl/.___init__.py
- Supplementary Material/Code/src/macro_marl/MA_iac_rnn_V/
- __MACOSX/Supplementary Material/Code/src/macro_marl/._MA_iac_rnn_V
- Supplementary Material/Code/src/macro_marl/MA_cac_rnn_V/
- __MACOSX/Supplementary Material/Code/src/macro_marl/._MA_cac_rnn_V
- Supplementary Material/Code/src/macro_marl/MA_niacc_rnn_V/
- __MACOSX/Supplementary Material/Code/src/macro_marl/._MA_niacc_rnn_V
- Supplementary Material/Code/src/macro_marl/my_env/
- __MACOSX/Supplementary Material/Code/src/macro_marl/._my_env
- Supplementary Material/Code/visualization/policy_nns/Overcooked/mapA/
- __MACOSX/Supplementary Material/Code/visualization/policy_nns/Overcooked/._mapA
- Supplementary Material/Code/visualization/policy_nns/Overcooked/mapB/
- __MACOSX/Supplementary Material/Code/visualization/policy_nns/Overcooked/._mapB
- Supplementary Material/Code/visualization/policy_nns/Overcooked/mapC/
- __MACOSX/Supplementary Material/Code/visualization/policy_nns/Overcooked/._mapC
- Supplementary Material/Code/visualization/policy_nns/OSD_D/1848005/
- __MACOSX/Supplementary Material/Code/visualization/policy_nns/OSD_D/._1848005
- Supplementary Material/Code/visualization/policy_nns/OSD_D/2720/
- __MACOSX/Supplementary Material/Code/visualization/policy_nns/OSD_D/._2720
- Supplementary Material/Code/visualization/policy_nns/OSD_D/18P20/
- __MACOSX/Supplementary Material/Code/visualization/policy_nns/OSD_D/._18P20
- Supplementary Material/Code/visualization/policy_nns/OSD_F/v040/
- __MACOSX/Supplementary Material/Code/visualization/policy_nns/OSD_F/._v040
- Supplementary Material/Code/visualization/policy_nns/BP_MA/14x14/
- __MACOSX/Supplementary Material/Code/visualization/policy_nns/BP_MA/._14x14
- Supplementary Material/Code/visualization/policy_nns/OSD_T/3040/
- __MACOSX/Supplementary Material/Code/visualization/policy_nns/OSD_T/._3040
- Supplementary Material/Code/visualization/policy_nns/OSD_T/4R383827/
- __MACOSX/Supplementary Material/Code/visualization/policy_nns/OSD_T/._4R383827
- Supplementary Material/Code/visualization/policy_nns/OSD_T/40/
- __MACOSX/Supplementary Material/Code/visualization/policy_nns/OSD_T/._40
- Supplementary Material/Code/src/macro_marl/MA_cen_condi_ddrqn/model_cen_condi.py
- __MACOSX/Supplementary Material/Code/src/macro_marl/MA_cen_condi_ddrqn/._model_cen_condi.py
- Supplementary Material/Code/src/macro_marl/MA_cen_condi_ddrqn/team_cen_condi.py
- __MACOSX/Supplementary Material/Code/src/macro_marl/MA_cen_condi_ddrqn/._team_cen_condi.py
- Supplementary Material/Code/src/macro_marl/MA_cen_condi_ddrqn/learning_methods_cen_condi.py
- __MACOSX/Supplementary Material/Code/src/macro_marl/MA_cen_condi_ddrqn/._learning_methods_cen_condi.py
- Supplementary Material/Code/src/macro_marl/MA_cen_condi_ddrqn/envs_runner_cen_condi.py
- __MACOSX/Supplementary Material/Code/src/macro_marl/MA_cen_condi_ddrqn/._envs_runner_cen_condi.py
- Supplementary Material/Code/src/macro_marl/MA_cen_condi_ddrqn/__init__.py
- __MACOSX/Supplementary Material/Code/src/macro_marl/MA_cen_condi_ddrqn/.___init__.py
- Supplementary Material/Code/src/macro_marl/MA_cen_condi_ddrqn/utils/
- __MACOSX/Supplementary Material/Code/src/macro_marl/MA_cen_condi_ddrqn/._utils
- Supplementary Material/Code/src/macro_marl/MA_niacc_rnn_sV/learner_1.py
- __MACOSX/Supplementary Material/Code/src/macro_marl/MA_niacc_rnn_sV/._learner_1.py
- Supplementary Material/Code/src/macro_marl/MA_niacc_rnn_sV/models.py
- __MACOSX/Supplementary Material/Code/src/macro_marl/MA_niacc_rnn_sV/._models.py
- Supplementary Material/Code/src/macro_marl/MA_niacc_rnn_sV/memory.py
- __MACOSX/Supplementary Material/Code/src/macro_marl/MA_niacc_rnn_sV/._memory.py
- Supplementary Material/Code/src/macro_marl/MA_niacc_rnn_sV/__init__.py
- __MACOSX/Supplementary Material/Code/src/macro_marl/MA_niacc_rnn_sV/.___init__.py
- Supplementary Material/Code/src/macro_marl/MA_niacc_rnn_sV/envs_runner.py
- __MACOSX/Supplementary Material/Code/src/macro_marl/MA_niacc_rnn_sV/._envs_runner.py
- Supplementary Material/Code/src/macro_marl/MA_niacc_rnn_sV/learner.py
- __MACOSX/Supplementary Material/Code/src/macro_marl/MA_niacc_rnn_sV/._learner.py
- Supplementary Material/Code/src/macro_marl/MA_iaicc_rnn_V/learner_1.py
- __MACOSX/Supplementary Material/Code/src/macro_marl/MA_iaicc_rnn_V/._learner_1.py
- Supplementary Material/Code/src/macro_marl/MA_iaicc_rnn_V/controller.py
- __MACOSX/Supplementary Material/Code/src/macro_marl/MA_iaicc_rnn_V/._controller.py
- Supplementary Material/Code/src/macro_marl/MA_iaicc_rnn_V/__init__.py
- __MACOSX/Supplementary Material/Code/src/macro_marl/MA_iaicc_rnn_V/.___init__.py
- Supplementary Material/Code/src/macro_marl/MA_iaicc_rnn_V/utils.py
- __MACOSX/Supplementary Material/Code/src/macro_marl/MA_iaicc_rnn_V/._utils.py
- Supplementary Material/Code/src/macro_marl/MA_iaicc_rnn_V/learner.py
- __MACOSX/Supplementary Material/Code/src/macro_marl/MA_iaicc_rnn_V/._learner.py
- Supplementary Material/Code/src/macro_marl/MA_hddrqn/learning_methods.py
- __MACOSX/Supplementary Material/Code/src/macro_marl/MA_hddrqn/._learning_methods.py
- Supplementary Material/Code/src/macro_marl/MA_hddrqn/__init__.py
- __MACOSX/Supplementary Material/Code/src/macro_marl/MA_hddrqn/.___init__.py
- Supplementary Material/Code/src/macro_marl/MA_hddrqn/utils/
- __MACOSX/Supplementary Material/Code/src/macro_marl/MA_hddrqn/._utils
- Supplementary Material/Code/src/macro_marl/MA_hddrqn/team.py
- __MACOSX/Supplementary Material/Code/src/macro_marl/MA_hddrqn/._team.py
- Supplementary Material/Code/src/macro_marl/MA_hddrqn/model.py
- __MACOSX/Supplementary Material/Code/src/macro_marl/MA_hddrqn/._model.py
- Supplementary Material/Code/src/macro_marl/MA_hddrqn/envs_runner.py
- __MACOSX/Supplementary Material/Code/src/macro_marl/MA_hddrqn/._envs_runner.py
- Supplementary Material/Code/src/macro_marl/MA_iac_rnn_V/controller.py
- __MACOSX/Supplementary Material/Code/src/macro_marl/MA_iac_rnn_V/._controller.py
- Supplementary Material/Code/src/macro_marl/MA_iac_rnn_V/models.py
- __MACOSX/Supplementary Material/Code/src/macro_marl/MA_iac_rnn_V/._models.py
- Supplementary Material/Code/src/macro_marl/MA_iac_rnn_V/memory.py
- __MACOSX/Supplementary Material/Code/src/macro_marl/MA_iac_rnn_V/._memory.py
- Supplementary Material/Code/src/macro_marl/MA_iac_rnn_V/__init__.py
- __MACOSX/Supplementary Material/Code/src/macro_marl/MA_iac_rnn_V/.___init__.py
- Supplementary Material/Code/src/macro_marl/MA_iac_rnn_V/utils.py
- __MACOSX/Supplementary Material/Code/src/macro_marl/MA_iac_rnn_V/._utils.py
- Supplementary Material/Code/src/macro_marl/MA_iac_rnn_V/envs_runner.py
- __MACOSX/Supplementary Material/Code/src/macro_marl/MA_iac_rnn_V/._envs_runner.py
- Supplementary Material/Code/src/macro_marl/MA_iac_rnn_V/learner.py
- __MACOSX/Supplementary Material/Code/src/macro_marl/MA_iac_rnn_V/._learner.py
- Supplementary Material/Code/src/macro_marl/MA_cac_rnn_V/controller.py
- __MACOSX/Supplementary Material/Code/src/macro_marl/MA_cac_rnn_V/._controller.py
- Supplementary Material/Code/src/macro_marl/MA_cac_rnn_V/models.py
- __MACOSX/Supplementary Material/Code/src/macro_marl/MA_cac_rnn_V/._models.py
- Supplementary Material/Code/src/macro_marl/MA_cac_rnn_V/memory.py
- __MACOSX/Supplementary Material/Code/src/macro_marl/MA_cac_rnn_V/._memory.py
- Supplementary Material/Code/src/macro_marl/MA_cac_rnn_V/__init__.py
- __MACOSX/Supplementary Material/Code/src/macro_marl/MA_cac_rnn_V/.___init__.py
- Supplementary Material/Code/src/macro_marl/MA_cac_rnn_V/utils.py
- __MACOSX/Supplementary Material/Code/src/macro_marl/MA_cac_rnn_V/._utils.py
- Supplementary Material/Code/src/macro_marl/MA_cac_rnn_V/envs_runner.py
- __MACOSX/Supplementary Material/Code/src/macro_marl/MA_cac_rnn_V/._envs_runner.py
- Supplementary Material/Code/src/macro_marl/MA_cac_rnn_V/learner.py
- __MACOSX/Supplementary Material/Code/src/macro_marl/MA_cac_rnn_V/._learner.py
- Supplementary Material/Code/src/macro_marl/MA_niacc_rnn_V/learner_1.py
- __MACOSX/Supplementary Material/Code/src/macro_marl/MA_niacc_rnn_V/._learner_1.py
- Supplementary Material/Code/src/macro_marl/MA_niacc_rnn_V/controller.py
- __MACOSX/Supplementary Material/Code/src/macro_marl/MA_niacc_rnn_V/._controller.py
- Supplementary Material/Code/src/macro_marl/MA_niacc_rnn_V/models.py
- __MACOSX/Supplementary Material/Code/src/macro_marl/MA_niacc_rnn_V/._models.py
- Supplementary Material/Code/src/macro_marl/MA_niacc_rnn_V/memory.py
- __MACOSX/Supplementary Material/Code/src/macro_marl/MA_niacc_rnn_V/._memory.py
- Supplementary Material/Code/src/macro_marl/MA_niacc_rnn_V/__init__.py
- __MACOSX/Supplementary Material/Code/src/macro_marl/MA_niacc_rnn_V/.___init__.py
- Supplementary Material/Code/src/macro_marl/MA_niacc_rnn_V/utils.py
- __MACOSX/Supplementary Material/Code/src/macro_marl/MA_niacc_rnn_V/._utils.py
- Supplementary Material/Code/src/macro_marl/MA_niacc_rnn_V/envs_runner.py
- __MACOSX/Supplementary Material/Code/src/macro_marl/MA_niacc_rnn_V/._envs_runner.py
- Supplementary Material/Code/src/macro_marl/MA_niacc_rnn_V/learner.py
- __MACOSX/Supplementary Material/Code/src/macro_marl/MA_niacc_rnn_V/._learner.py
- Supplementary Material/Code/src/macro_marl/my_env/core_tripple_room.py
- __MACOSX/Supplementary Material/Code/src/macro_marl/my_env/._core_tripple_room.py
- Supplementary Material/Code/src/macro_marl/my_env/box_pushing.py
- __MACOSX/Supplementary Material/Code/src/macro_marl/my_env/._box_pushing.py
- Supplementary Material/Code/src/macro_marl/my_env/box_pushing_MA.py
- __MACOSX/Supplementary Material/Code/src/macro_marl/my_env/._box_pushing_MA.py
- Supplementary Material/Code/src/macro_marl/my_env/box_pushing_core.py
- __MACOSX/Supplementary Material/Code/src/macro_marl/my_env/._box_pushing_core.py
- Supplementary Material/Code/src/macro_marl/my_env/rendering.py
- __MACOSX/Supplementary Material/Code/src/macro_marl/my_env/._rendering.py
- Supplementary Material/Code/src/macro_marl/my_env/core_single_room.py
- __MACOSX/Supplementary Material/Code/src/macro_marl/my_env/._core_single_room.py
- Supplementary Material/Code/src/macro_marl/my_env/core_double_room.py
- __MACOSX/Supplementary Material/Code/src/macro_marl/my_env/._core_double_room.py
- Supplementary Material/Code/src/macro_marl/my_env/overcooked/
- __MACOSX/Supplementary Material/Code/src/macro_marl/my_env/._overcooked
- Supplementary Material/Code/src/macro_marl/my_env/__init__.py
- __MACOSX/Supplementary Material/Code/src/macro_marl/my_env/.___init__.py
- Supplementary Material/Code/src/macro_marl/my_env/box_pushing_MA_core.py
- __MACOSX/Supplementary Material/Code/src/macro_marl/my_env/._box_pushing_MA_core.py
- Supplementary Material/Code/src/macro_marl/my_env/core_four_room.py
- __MACOSX/Supplementary Material/Code/src/macro_marl/my_env/._core_four_room.py
- Supplementary Material/Code/src/macro_marl/my_env/.gitignore
- __MACOSX/Supplementary Material/Code/src/macro_marl/my_env/._.gitignore
- Supplementary Material/Code/src/macro_marl/my_env/osd_ma_four_room.py
- __MACOSX/Supplementary Material/Code/src/macro_marl/my_env/._osd_ma_four_room.py
- Supplementary Material/Code/src/macro_marl/my_env/osd_ma_tripple_room.py
- __MACOSX/Supplementary Material/Code/src/macro_marl/my_env/._osd_ma_tripple_room.py
- Supplementary Material/Code/src/macro_marl/my_env/osd_ma_single_room.py
- __MACOSX/Supplementary Material/Code/src/macro_marl/my_env/._osd_ma_single_room.py
- Supplementary Material/Code/src/macro_marl/my_env/osd_ma_double_room.py
- __MACOSX/Supplementary Material/Code/src/macro_marl/my_env/._osd_ma_double_room.py
- Supplementary Material/Code/visualization/policy_nns/Overcooked/mapA/13_agent_2.pt
- __MACOSX/Supplementary Material/Code/visualization/policy_nns/Overcooked/mapA/._13_agent_2.pt
- Supplementary Material/Code/visualization/policy_nns/Overcooked/mapA/13_agent_1.pt
- __MACOSX/Supplementary Material/Code/visualization/policy_nns/Overcooked/mapA/._13_agent_1.pt
- Supplementary Material/Code/visualization/policy_nns/Overcooked/mapA/13_agent_0.pt
- __MACOSX/Supplementary Material/Code/visualization/policy_nns/Overcooked/mapA/._13_agent_0.pt
- Supplementary Material/Code/visualization/policy_nns/Overcooked/mapB/10_agent_0.pt
- __MACOSX/Supplementary Material/Code/visualization/policy_nns/Overcooked/mapB/._10_agent_0.pt
- Supplementary Material/Code/visualization/policy_nns/Overcooked/mapB/10_agent_1.pt
- __MACOSX/Supplementary Material/Code/visualization/policy_nns/Overcooked/mapB/._10_agent_1.pt
- Supplementary Material/Code/visualization/policy_nns/Overcooked/mapB/10_agent_2.pt
- __MACOSX/Supplementary Material/Code/visualization/policy_nns/Overcooked/mapB/._10_agent_2.pt
- Supplementary Material/Code/visualization/policy_nns/Overcooked/mapC/12_agent_0.pt
- __MACOSX/Supplementary Material/Code/visualization/policy_nns/Overcooked/mapC/._12_agent_0.pt
- Supplementary Material/Code/visualization/policy_nns/Overcooked/mapC/12_agent_1.pt
- __MACOSX/Supplementary Material/Code/visualization/policy_nns/Overcooked/mapC/._12_agent_1.pt
- Supplementary Material/Code/visualization/policy_nns/Overcooked/mapC/12_agent_2.pt
- __MACOSX/Supplementary Material/Code/visualization/policy_nns/Overcooked/mapC/._12_agent_2.pt
- Supplementary Material/Code/visualization/policy_nns/OSD_D/1848005/15_agent_1.pt
- __MACOSX/Supplementary Material/Code/visualization/policy_nns/OSD_D/1848005/._15_agent_1.pt
[truncated: 134 more entries]
