# Supplementary material
Source: ML conference proceedings conference paper supplement (https://proceedings.neurips.cc/paper_files/paper/2022/hash/1c153788756d35559c22d105d1182c30-Abstract.html)
Supplement: Supplementary file 1 [file 1c153788756d35559c22d105d1182c30-Supplemental-Conference.zip › Supplementary Material/Code/anaconda_env/neurips22.yml]

name: neurips22
channels:
  - defaults
dependencies:
  - pip=21.2.4
  - python=3.8.12
  - pip:
    - absl-py==0.15.0
    - astunparse==1.6.3
    - backcall==0.2.0
    - cachetools==4.2.4
    - charset-normalizer==2.0.7
    - clang==5.0
    - cloudpickle==2.0.0
    - cycler==0.11.0
    - decorator==5.1.0
    - flatbuffers==1.12
    - gast==0.4.0
    - google-auth==2.3.3
    - google-auth-oauthlib==0.4.6
    - google-pasta==0.2.0
    - grpcio==1.41.1
    - gym==0.21.0
    - h5py==3.1.0
    - idna==3.3
    - ipdb==0.13.9
    - ipython==7.29.0
    - jedi==0.18.0
    - keras==2.6.0
    - keras-preprocessing==1.1.2
    - kiwisolver==1.3.2
    - markdown==3.3.4
    - matplotlib==3.4.3
    - matplotlib-inline==0.1.3
    - numpy==1.19.5
    - oauthlib==3.1.1
    - opt-einsum==3.3.0
    - pandas==1.3.4
    - parso==0.8.2
    - pexpect==4.8.0
    - pickleshare==0.7.5
    - pillow==8.4.0
    - prompt-toolkit==3.0.21
    - protobuf==3.19.1
    - ptyprocess==0.7.0
    - pyasn1==0.4.8
    - pyasn1-modules==0.2.8
    - pygame==2.0.3
    - pyglet==1.5.26
    - pygments==2.10.0
    - pyparsing==3.0.4
    - python-dateutil==2.8.2
    - pytz==2021.3
    - requests==2.26.0
    - requests-oauthlib==1.3.0
    - rsa==4.7.2
    - scipy==1.7.1
    - seaborn==0.11.2
    - six==1.15.0
    - tensorboard==2.7.0
    - tensorboard-data-server==0.6.1
    - tensorboard-plugin-wit==1.8.0
    - tensorflow==2.6.1
    - tensorflow-estimator==2.6.0
    - termcolor==1.1.0
    - toml==0.10.2
    - torch==1.10.0
    - traitlets==5.1.1
    - typing-extensions==3.7.4.3
    - urllib3==1.26.7
    - wcwidth==0.2.5
    - werkzeug==2.0.2
    - wrapt==1.12.1
