# Supplementary material
Source: ML conference proceedings conference paper supplement (https://proceedings.neurips.cc/paper_files/paper/2022/hash/1c153788756d35559c22d105d1182c30-Abstract.html)
Supplement: Supplementary file 1 [file 1c153788756d35559c22d105d1182c30-Supplemental-Conference.zip › Supplementary Material/Code/experiments/BoxPushing/mac_cen_q.sh]

#/bin/bash

for ((i=0; i<20; i++))
do
     ma_cen_condi_ddrqn.py  --save_dir='ma_cen_condi_ddrqn_bp8' \
                                --env_id='BP-MA-v0' \
                                --grid_dim 8 8 \
                                --n_agent=2 \
                                --env_terminate_step=100 \
                                --batch_size=64 \
                                --train_freq=10 \
                                --total_epi=40_000 \
                                --replay_buffer_size=100_000 \
                                --trace_len=10 \
                                --l_rate=0.001 \
                                --h_stable_at=4_000 \
                                --eps_l_d_steps=4_000 \
                                --eps_end=0.05 \
                                --discount=0.98 \
                                --start_train=500 \
                                --rnn_h_size=64 \
                                --rnn \
                                --dynamic_h \
                                --eps_l_d \
                                --run_id=$i & 
done

for ((i=0; i<20; i++))
do
     ma_cen_condi_ddrqn.py  --save_dir='ma_cen_condi_ddrqn_bp10' \
                                --env_id='BP-MA-v0' \
                                --grid_dim 10 10 \
                                --n_agent=2 \
                                --env_terminate_step=100 \
                                --batch_size=128 \
                                --train_freq=14 \
                                --total_epi=40_000 \
                                --replay_buffer_size=100_000 \
                                --trace_len=14 \
                                --l_rate=0.001 \
                                --h_stable_at=6_000 \
                                --eps_l_d_steps=6_000 \
                                --eps_end=0.05 \
                                --discount=0.98 \
                                --start_train=500 \
                                --rnn_h_size=64 \
                                --rnn \
                                --dynamic_h \
                                --eps_l_d \
                                --run_id=$i & 
done

for ((i=0; i<20; i++))
do
     ma_cen_condi_ddrqn.py  --save_dir='ma_cen_condi_ddrqn_bp12' \
                                --env_id='BP-MA-v0' \
                                --grid_dim 12 12 \
                                --n_agent=2 \
                                --env_terminate_step=100 \
                                --batch_size=128 \
                                --train_freq=20 \
                                --total_epi=40_000 \
                                --replay_buffer_size=100_000 \
                                --trace_len=20 \
                                --l_rate=0.001 \
                                --h_stable_at=6_000 \
                                --eps_l_d_steps=6_000 \
                                --eps_end=0.05 \
                                --discount=0.98 \
                                --start_train=500 \
                                --rnn_h_size=64 \
                                --rnn \
                                --dynamic_h \
                                --eps_l_d \
                                --run_id=$i & 
done

for ((i=0; i<20; i++))
do
     ma_cen_condi_ddrqn.py  --save_dir='ma_cen_condi_ddrqn_bp20' \
                                --env_id='BP-MA-v0' \
                                --grid_dim 20 20 \
                                --n_agent=2 \
                                --env_terminate_step=100 \
                                --batch_size=64 \
                                --train_freq=35 \
                                --total_epi=40_000 \
                                --replay_buffer_size=100_000 \
                                --trace_len=35 \
                                --l_rate=0.001 \
                                --h_stable_at=8_000 \
                                --eps_l_d_steps=8_000 \
                                --eps_end=0.05 \
                                --discount=0.98 \
                                --start_train=500 \
                                --rnn_h_size=64 \
                                --rnn \
                                --dynamic_h \
                                --eps_l_d \
                                --run_id=$i & 
done

for ((i=0; i<20; i++))
do
     ma_cen_condi_ddrqn.py  --save_dir='ma_cen_condi_ddrqn_bp30' \
                                --env_id='BP-MA-v0' \
                                --grid_dim 30 30 \
                                --n_agent=2 \
                                --env_terminate_step=100 \
                                --batch_size=32 \
                                --train_freq=45 \
                                --total_epi=40_000 \
                                --replay_buffer_size=100_000 \
                                --trace_len=45 \
                                --l_rate=0.001 \
                                --h_stable_at=8_000 \
                                --eps_l_d_steps=8_000 \
                                --eps_end=0.05 \
                                --discount=0.98 \
                                --start_train=500 \
                                --rnn_h_size=64 \
                                --rnn \
                                --dynamic_h \
                                --eps_l_d \
                                --run_id=$i & 
done
