# Supplementary material
Source: ML conference proceedings conference paper supplement (https://proceedings.neurips.cc/paper_files/paper/2022/hash/1c153788756d35559c22d105d1182c30-Abstract.html)
Supplement: Supplementary file 1 [file 1c153788756d35559c22d105d1182c30-Supplemental-Conference.zip › Supplementary Material/Code/experiments/Overcooked/cac.sh]

#/bin/bash
# Overcooked-A
for ((i=0; i<20; i++))
do
    ma_cac_rnn_V.py  --save_dir='cac_overcooked_A' \
                                --env_id='Overcooked-PO-v1' \
                                --n_agent=3 \
                                --env_terminate_step=200 \
                                --a_lr=0.0003 \
                                --c_lr=0.003 \
                                --train_freq=8 \
                                --n_env=8 \
                                --c_target_update_freq=16 \
                                --n_step_TD=5 \
                                --grad_clip_norm=0 \
                                --eps_start=1.0 \
                                --eps_end=0.05 \
                                --eps_stable_at=20_000 \
                                --total_epi=100_000 \
                                --grid_dim 7 7 \
                                --gamma=0.99 \
                                --eval_policy \
                                --sample_epi \
                                --run_id=$i \
                                --task=6 \
                                --map_type=A \
                                --step_penalty=-0.1 \
                                --c_mlp_layer_size 128 64 \
                                --c_rnn_layer_size=64 & 
done

# Overcooked-B
for ((i=0; i<20; i++))
do
    ma_cac_rnn_V.py  --save_dir='cac_overcooked_B' \
                                --env_id='Overcooked-PO-v1' \
                                --n_agent=3 \
                                --env_terminate_step=200 \
                                --a_lr=0.0003 \
                                --c_lr=0.003 \
                                --train_freq=4 \
                                --n_env=4 \
                                --c_target_update_freq=16 \
                                --n_step_TD=5 \
                                --grad_clip_norm=0 \
                                --eps_start=1.0 \
                                --eps_end=0.05 \
                                --eps_stable_at=20_000 \
                                --total_epi=120_000 \
                                --grid_dim 7 7 \
                                --gamma=0.99 \
                                --eval_policy \
                                --sample_epi \
                                --run_id=$i \
                                --task=6 \
                                --map_type=B \
                                --step_penalty=-0.1 \
                                --c_mlp_layer_size 128 64 \
                                --c_rnn_layer_size=64 & 
done

# Overcooked-C
for ((i=0; i<20; i++))
do
    ma_cac_rnn_V.py  --save_dir='cac_overcooked_C' \
                                --env_id='Overcooked-PO-v1' \
                                --n_agent=3 \
                                --env_terminate_step=200 \
                                --a_lr=0.0003 \
                                --c_lr=0.003 \
                                --train_freq=8 \
                                --n_env=8 \
                                --c_target_update_freq=32 \
                                --n_step_TD=5 \
                                --grad_clip_norm=0 \
                                --eps_start=1.0 \
                                --eps_end=0.05 \
                                --eps_stable_at=20_000 \
                                --total_epi=100_000 \
                                --grid_dim 7 7 \
                                --gamma=0.99 \
                                --eval_policy \
                                --sample_epi \
                                --run_id=$i \
                                --task=6 \
                                --map_type=C \
                                --step_penalty=-0.1 \
                                --c_mlp_layer_size 128 64 \
                                --c_rnn_layer_size=64 & 
done
