# Supplementary material
Source: ML conference proceedings conference paper supplement (https://proceedings.neurips.cc/paper_files/paper/2022/hash/1c153788756d35559c22d105d1182c30-Abstract.html)
Supplement: Supplementary file 1 [file 1c153788756d35559c22d105d1182c30-Supplemental-Conference.zip › Supplementary Material/Code/scripts/ma_hddrqn.py]

import argparse
import numpy as np
import torch
import os
import sys
import time
import random
import gym

from macro_marl import my_env
from macro_marl.MA_hddrqn.team import Team_RNN
from macro_marl.MA_hddrqn.utils.memory import ReplayMemory_rand, ReplayMemory_epi
from macro_marl.MA_hddrqn.utils.utils import save_check_point
from macro_marl.MA_hddrqn.learning_methods import QLearn_squ

from macro_marl import my_env
from macro_marl.my_env.overcooked.macActEnvWrapper import MacEnvWrapper

from torch.utils.tensorboard import SummaryWriter

def train(env_id, obs_one_hot, target_flick_prob, agent_trans_noise, target_rand_move, 
          grid_dim, big_box_reward, small_box_reward, penalty, 
          h0_speed_ps, h1_speed_ps, h2_speed_ps, tb_m_speed, tb_m_noisy, tb_m_cost, f_p_obj_tc, f_l_obj_tc, f_m_noisy, f_drop_obj_pen, d_pen, obs_h_wait,
          task, map_type, step_penalty,
          env_terminate_step, n_env, n_agent, total_epi, replay_buffer_size, sample_epi, 
          dynamic_h, init_h, end_h, h_stable_at, eps_l_d, eps_l_d_steps, eps_end, eps_e_d, softmax_explore, h_explore, db_step,
          optim, l_rate, discount, huber_l, g_clip, g_clip_v, g_clip_norm, g_clip_max_norm,
          start_train, train_freq, target_update_freq, trace_len, sub_trace_len, batch_size,
          sort_traj, mlp_layer_size, rnn, rnn_layer_num, rnn_h_size, lstm, 
          eval_freq, run_id, run_time, resume, save_ckpt, save_ckpt_time, log, seed, save_dir, device, **kwargs):

    # define the name of the directory to be created
    os.makedirs("./performance/"+save_dir+"/train", exist_ok=True)
    os.makedirs("./performance/"+save_dir+"/test", exist_ok=True)
    os.makedirs("./performance/"+save_dir+"/check_point", exist_ok=True)
    os.makedirs("./policy_nns/"+save_dir, exist_ok=True)

    os.makedirs("./log/"+save_dir+'/run_'+str(run_id)+'/train/', exist_ok=True)
    train_writer = SummaryWriter(log_dir='./log/'+save_dir+'/run_'+str(run_id)+'/train/', flush_secs=30)

    if seed is not None:
        seed = seed *10
        random.seed(seed)
        np.random.seed(seed)
        torch.manual_seed(seed)
    # torch.set_num_threads(1)

    # create env 
    if env_id.startswith('OSD') or env_id.startswith('BP'):
        env_params = {'grid_dim': grid_dim,
                      'big_box_reward': big_box_reward,
                      'small_box_reward': small_box_reward,
                      'penalty': penalty,
                      'n_agent': n_agent,
                      'terminate_step': env_terminate_step,
                      'TB_move_speed': tb_m_speed,
                      'TB_move_noisy': tb_m_noisy,
                      'TB_move_cost': tb_m_cost,
                      'fetch_pass_obj_tc': f_p_obj_tc,
                      'fetch_look_for_obj_tc': f_l_obj_tc,
                      'fetch_manip_noisy': f_m_noisy,
                      'delay_delivery_penalty': d_pen,
                      'obs_human_wait': obs_h_wait
                      }
        if env_id.startswith('OSD-T'):
            env_params['human_speed_per_step'] = [h0_speed_ps, h1_speed_ps, h2_speed_ps]
        elif env_id.startswith('OSD-D'):
            env_params['human_speed_per_step'] = [h0_speed_ps, h1_speed_ps]
        else:
            env_params['human_speed_per_step'] = [h0_speed_ps]
        env = gym.make(env_id, **env_params)
    else:
        taskList = ["tomato salad", "lettuce salad", "onion salad", "lettuce-tomato salad", "onion-tomato salad", "lettuce-onion salad", "lettuce-onion-tomato salad"]
        receipt = taskList[task]
        rewardList = {"subtask finished": 10, "correct delivery": 200, "wrong delivery": -5, "step penalty": step_penalty}
        debug = False
        env_params = {'grid_dim': grid_dim,
                        'mapType': map_type, 
                        'task': receipt,
                        'rewardList': rewardList,
                        'debug': debug
                    }
        env = gym.make(env_id, **env_params)
        if env_id.find("MA") != -1:
            env = MacEnvWrapper(env)

    # create replay buffer
    if sample_epi:
        memory = ReplayMemory_epi(env.n_agent, env.obs_size, env.n_action, batch_size, size=replay_buffer_size)
    else:
        memory = ReplayMemory_rand(env.n_agent, env.obs_size, env.n_action, trace_len, batch_size, size=replay_buffer_size)

    # collect hyper params:
    hyper_params = {'epsilon_linear_decay': eps_l_d,
                    'epsilon_linear_decay_steps': eps_l_d_steps,
                    'epsilon_end': eps_end,
                    'h_explore': h_explore,
                    'soft_action_selection': softmax_explore,
                    'epsilon_exp_decay': eps_e_d,
                    'dynamic_h': dynamic_h,
                    'hysteretic': (init_h, end_h),
                    'optimizer': optim,
                    'learning_rate': l_rate,
                    'discount': discount,
                    'huber_loss': huber_l,
                    'grad_clip': g_clip,
                    'grad_clip_value': g_clip_v,
                    'grad_clip_norm': g_clip_norm,
                    'grad_clip_max_norm': g_clip_max_norm,
                    'sample_epi': sample_epi,
                    'trace_len': trace_len,
                    'sub_trace_len': sub_trace_len,
                    'batch_size': batch_size,
                    'sort_traj': sort_traj,
                    'device': device}


    model_params = {'mlp_layer_size': mlp_layer_size,
                    'rnn_layer_num': rnn_layer_num,
                    'rnn_h_size': rnn_h_size,
                    'LSTM': lstm}

    # create team
    team = Team_RNN(env, env_terminate_step, n_env, memory, env.n_agent, QLearn_squ, h_stable_at,
            save_dir=save_dir, nn_model_params=model_params, eval_freq=eval_freq, seed=seed, writer=train_writer, log=log, **hyper_params)

    t = time.time()
    training_count=0
    target_updating_count = 0

    step = 0

    # continue training using the lastest check point
    if resume:
        team.load_check_point(run_id)
        step = team.step_count

    while team.episode_count < total_epi:
        team.step(run_id)
        if (not step % train_freq) and team.episode_count >= start_train:
            # update hysteretic learning rate
            if db_step:
                team.update_hysteretic(step)
            else:
                team.update_hysteretic(team.episode_count-start_train)

            for _ in range(n_env):
                team.train()

            # update epsilon
            if db_step:
                team.update_epsilon(step)
            else:
                team.update_epsilon(team.episode_count-start_train)

            training_count += 1

        if not step % target_update_freq: 
            team.update_target_net() 
            target_updating_count += 1 

        if team.episode_count % eval_freq == 0 and team.envs_runner.step_count[0] == 0:
            print('[{}]run, [{:.1f}K] took {:.3f}hr to finish {} episodes {} trainning and {} target_net updating (eps={}) latest return ({})'.format(
                    run_id, step/1000, (time.time()-t)/3600, team.episode_count, training_count, target_updating_count, team.epsilon, team.TEST_PERFORM[-1]), flush=True)

        if (time.time()-t) // 3600 >= save_ckpt_time and save_ckpt:
            save_check_point(team.envs_runner, team.agents, step, team.episode_count, team.hysteretic, team.epsilon, save_dir, team.memory, run_id, team.TEST_PERFORM) 
            # only reach here once within 24hrs
            save_ckpt_time *= 2

        if (time.time()-t) // 3600 >= run_time and save_ckpt:
            save_check_point(team.envs_runner, team.agents, step, team.episode_count, team.hysteretic, team.epsilon, save_dir, team.memory, run_id, team.TEST_PERFORM) 
            break

        step += 1

    if team.episode_count == total_epi and save_ckpt:
        save_check_point(team.envs_runner, team.agents, step, team.episode_count, team.hysteretic, team.epsilon, save_dir, team.memory, run_id, team.TEST_PERFORM) 
        print("Finish entire training ... ", flush=True)
    team.envs_runner.close()

def main():
    parser = argparse.ArgumentParser()
    parser.add_argument('--env_id',             action='store',        type=str,             default='OSD-S-v4',    help='Domain name')
    parser.add_argument('--env_terminate_step', action='store',        type=int,             default=150,           help='Maximal steps for termination')
    parser.add_argument('--obs_one_hot',        action='store_true',                                                help='Whether represents observation as a one-hot vector')
    parser.add_argument('--target_flick_prob',  action='store',        type=float,           default=0.3,           help='Probability of not observing target in Capture Target domain')
    parser.add_argument('--agent_trans_noise',  action='store',        type=float,           default=0.1,           help='Agent dynamics noise in Capture Target domain')
    parser.add_argument('--target_rand_move',   action='store_true',                                                help='Whether apply target random movement')
    parser.add_argument('--n_env',              action='store',        type=int,             default=1,             help='Number of envs running in parallel')
    parser.add_argument('--n_agent',            action='store',        type=int,             default=2,             help='Number of agents')

    #BPMA
    parser.add_argument('--grid_dim',           action='store',        type=int,  nargs=2,   default=[6,6],         help='Grid world size')
    parser.add_argument('--big_box_reward',     action='store',        type=float,           default=300.0,         help='Reward for pushing big box to the goal')
    parser.add_argument('--small_box_reward',   action='store',        type=float,           default=20.0,          help='Reward for pushing small box to the goal')
    parser.add_argument('--penalty',            action='store',        type=float,           default=-10.0,         help='Penalty for hitting wall or pushing big box alone')
    
    #OSD params
    parser.add_argument('--h0_speed_ps',        action='store',        type=int,  nargs='+', default=[18,18,18,18], help='Time-step cost for each work step of human task')
    parser.add_argument('--h1_speed_ps',        action='store',        type=int,  nargs='+', default=[18,18,18,18], help='Time-step cost for each work step of human_1 task')
    parser.add_argument('--h2_speed_ps',        action='store',        type=int,  nargs='+', default=[18,18,18,18], help='Time-step cost for each work step of human_2 task')
    parser.add_argument('--tb_m_speed',         action='store',        type=float,           default=0.6,           help='Turtlebot move speed m/s')
    parser.add_argument('--tb_m_noisy',         action='store',        type=float,           default=0.0,           help='Turtlebot dynamics noise')
    parser.add_argument('--tb_m_cost',          action='store',        type=float,           default=0.0,           help='Extra cost for turtlebot moving')
    parser.add_argument('--f_p_obj_tc',         action='store',        type=int,             default=4,             help='Time-step cost for finishing macro-action Pass_obj by Fetch robot')
    parser.add_argument('--f_l_obj_tc',         action='store',        type=int,             default=6,             help='Time-step cost for finishing macro-action Look_for_obj by Fetch robot')
    parser.add_argument('--f_m_noisy',          action='store',        type=float,           default=0.0,           help='Fetch robot dynamics nois')
    parser.add_argument('--f_drop_obj_pen',     action='store',        type=float,           default=-10.0,         help='Penalty for droping any tool')
    parser.add_argument('--d_pen',              action='store',        type=float,           default=0.0,           help='Whether apply penatly for delayed tool delivery')
    parser.add_argument('--obs_h_wait',         action='store_true',                                                help='Whether observes human wait or not')

    #overcooked
    parser.add_argument('--task',               action='store',        type=int,             default=0,             help='The receipt agent cooks')
    parser.add_argument('--map_type',           action='store',        type=str,             default="A",           help='The type of map')
    parser.add_argument('--step_penalty',       action='store',        type=float,           default=-0.1,          help='Penalty for every time step')

    parser.add_argument('--total_epi',          action='store',        type=int,             default=40*1000,       help='Number of training episodes')
    parser.add_argument('--replay_buffer_size', action='store',        type=int,             default=1000,          help='Number of episodes/sequences in replay buffer')
    parser.add_argument('--sample_epi',         action='store_true',                                                help='Whether use full-episode-based replay buffer or not')
    parser.add_argument('--dynamic_h',          action='store_true',                                                help='Whether apply hysteritic learning rate decay or not')
    parser.add_argument('--init_h',             action='store',        type=float,           default=0.2,           help='Initial value of hysteretic learning rate')
    parser.add_argument('--end_h',              action='store',        type=float,           default=0.4,           help='Ending value of hysteretic learning rate')
    parser.add_argument('--h_stable_at',        action='store',        type=int,             default=4*1000,        help='Decaying period according to episodes/steps')

    parser.add_argument('--eps_l_d',            action='store_true',                                                help='Whether use epsilon linear decay for exploartion or not')
    parser.add_argument('--eps_l_d_steps',      action='store',        type=int,             default=4*1000,        help='Decaying period according to episodes/steps')
    parser.add_argument('--eps_end',            action='store',        type=float,           default=0.1,           help='Ending value of epsilon')
    parser.add_argument('--eps_e_d',            action='store_true',                                                help='Whether use episode-based epsilon linear decay or not')
    parser.add_argument('--softmax_explore',    action='store_true',                                                help='Whether apply softmac for exploration')
    parser.add_argument('--h_explore',          action='store_true',                                                help='whether use history-based policy for exploration or not')
    parser.add_argument('--db_step',            action='store_true',                                                help='Whether use step-based decaying manner or not')

    parser.add_argument('--optim',              action='store',         type=str,            default='Adam',        help='Optimizer')
    parser.add_argument('--l_rate',             action='store',         type=float,          default=0.0006,        help='Learning rate')
    parser.add_argument('--discount',           action='store',         type=float,          default=0.95,          help='Discount factor')
    parser.add_argument('--huber_l',            action='store_true',                                                help='Whether use huber loss or not')
    parser.add_argument('--g_clip',             action='store_true',                                                help='Whether use gradient clip or not')
    parser.add_argument('--g_clip_v',           action='store',         type=float,          default=0.0,           help='Absolute Value limitation for gradient clip')
    parser.add_argument('--g_clip_norm',        action='store_true',                                                help='Whether use norm-based gradient clip')
    parser.add_argument('--g_clip_max_norm',    action='store',         type=float,          default=0.0,           help='Norm limitation for gradient clip')

    parser.add_argument('--start_train',        action='store',         type=int,            default=2,             help='Training starts after a number of episodes')
    parser.add_argument('--train_freq',         action='store',         type=int,            default=30,            help='Updating performs every a number of steps')
    parser.add_argument('--target_update_freq', action='store',         type=int,            default=5000,          help='Updating target net every a number of steps')
    parser.add_argument('--trace_len',          action='store',         type=int,            default=10,            help='The length of each sequence saved in replay buffer when not using full-episode-based replay buffer') 
    parser.add_argument('--sub_trace_len',      action='store',         type=int,            default=1,             help='Minimal length of a sequence for traning data filtering')
    parser.add_argument('--sort_traj',          action='store_true',                                                help='Whether sort sequences based on its valid length after squeezing experiences or not, redundant param for pytorch version later than 1.1.0')
    parser.add_argument('--batch_size',         action='store',         type=int,            default=16,            help='Number of episodes/sequences in a batch')

    parser.add_argument('--rnn',                action='store_true',                                                help='Whether using rnn-based agent')
    parser.add_argument('--mlp_layer_size',     action='store',         type=int, nargs='+', default=[32,32],       help='MLP layer dimension of decentralized policy-net (before, after) the RNN layer')
    parser.add_argument('--rnn_layer_num',      action='store',         type=int,            default=1,             help='Number of RNN layers')
    parser.add_argument('--rnn_h_size',         action='store',         type=int,            default=32,            help='RNN hidden layer dimension of decentralized policy-net')
    parser.add_argument('--lstm',               action='store_true',                                                help='Whether use lstm or not')

    parser.add_argument('--eval_freq',          action='store',         type=int,            default=100,           help='Pause training every 100 episodes for evaluation')
    parser.add_argument('--resume',             action='store_true',                                                help='Whether use saved ckpt to continue training or not')
    parser.add_argument('--save_ckpt',          action='store_true',                                                help='Whether save ckpt or not')
    parser.add_argument('--save_ckpt_time',     action='store',         type=int,            default=12,            help='The number of hrs to save a ckpt')
    parser.add_argument('--log',                action='store_true',                                                help='Whether log or not')
    parser.add_argument('--run_id',             action='store',         type=int,            default=0,             help='Index of a run')
    parser.add_argument('--run_time',           action='store',         type=int,            default=22,            help='The number of hrs to run')
    parser.add_argument('--seed',               action='store',         type=int,            default=None,          help='Random seed of a run')
    parser.add_argument('--save_dir',           action='store',         type=str,            default=None,          help='Directory name for storing trainning results')
    parser.add_argument('--device',             action='store',         type=str,            default='cpu',         help='Which device (CPU/GPU) to use.')

    params = vars(parser.parse_args())

    train(**params)

if __name__ == '__main__':
    main()
