# Supplementary material
Source: ML conference proceedings conference paper supplement (https://proceedings.neurips.cc/paper_files/paper/2022/hash/1c153788756d35559c22d105d1182c30-Abstract.html)
Supplement: Supplementary file 1 [file 1c153788756d35559c22d105d1182c30-Supplemental-Conference.zip › Supplementary Material/Code/src/macro_marl/MA_cen_condi_ddrqn/learning_methods_cen_condi.py]

import numpy as np
import torch
import torch.nn.functional as F

from torch.nn.utils import clip_grad_norm_
from torch.nn.utils.rnn import pad_sequence, pack_padded_sequence, pad_packed_sequence
from .utils.utils import _prune_o, _prune_o_n, get_conditional_argmax, get_conditional_action, _prune_filtered_o, _prune_filtered_o_n

def QLearn_squ_cen_condi_0(env, 
                           cen_controller, 
                           batch, 
                           hysteretic, 
                           discount, 
                           trace_len, 
                           sub_trace_len, 
                           batch_size, 
                           sort_traj=False, 
                           huber_loss=False, 
                           grad_clip=False, 
                           grad_clip_value=None,
                           grad_clip_norm=False, 
                           grad_clip_max_norm=None, 
                           rnn=True, 
                           device='cpu', 
                           **kwargs):

    """
    Parameters
    ----------
    env : gym.env
        A macro-action-based gym envrionment.
    cen_controller : Cen_Controller
         An instance of Cen_Controller class.
    batch : List[List[..]] 
        A list of episodic joint experiences.
    discount : float
        Discount factor for learning.
    trace_len : int
        The length of the longest episode.
    sub_trace_len : int
        The length of the shortes episode for filtering.
    batch_size : int
        The number of episodes/sequences in a batch.
    sort_traj : bool
        Whether sort the sampled episodes/sequences according to each episode's valid length after squeezing operation. 
    huber_loss : bool
        Whether apply huber loss or not.
    grad_clip : bool
        Whether use gradient clip or not.
    grad_clip_value : float
        Absolute value limitation for gradient clip.
    grad_clip_norm : bool
        Whether use norm-based gradient clip
    grad_clip_max_norm : float
        Norm limitation for gradient clip.
    rnn : bool
        whether use rnn-agent or not.
    device : str
        Which device (CPU/GPU) to use.
    """

    cen_controller.policy_net.train()

    # calculate loss for controller
    policy_net = cen_controller.policy_net
    target_net = cen_controller.target_net

    # seperate elements in the batch
    state_b, id_action_b, j_action_b, id_reward_b, j_reward_b, gamma_b, state_next_b, avail_next_j_a_b, terminate_b, id_valid_b, j_valid_b = zip(*batch)

    assert len(state_b) == trace_len * batch_size, "batch's data problem ..."
    assert len(state_next_b) == trace_len * batch_size, "batch's data problem ..."

    s_b = torch.cat(state_b).view(batch_size, trace_len, -1).to(device)                         #dim: (batch_size, trace_len, policy.net.input_dim)
    id_a_b = torch.cat(id_action_b).view(batch_size, trace_len, -1).to(device)                  #dim: (batch_size, trace_len, 1)
    j_a_b = torch.cat(j_action_b).view(batch_size, trace_len, 1).to(device)                     #dim: (batch_size, trace_len, 1)
    #TODO id_reward_b 
    j_r_b = torch.cat(j_reward_b).view(batch_size, trace_len, 1).to(device)                     #dim: (batch_size, trace_len, 1)
    gamma_b = torch.cat(gamma_b).view(batch_size, trace_len, 1).to(device)                     #dim: (batch_size, trace_len, 1)
    s_next_b = torch.cat(state_next_b).view(batch_size, trace_len, -1).to(device)               #dim: (batch_size, trace_len, policy.net.input_dim)
    avail_next_j_a_b = torch.cat(avail_next_j_a_b).view(batch_size, trace_len, -1).to(device)
    t_b = torch.cat(terminate_b).view(batch_size, trace_len, 1).to(device)                      #dim: (batch_size, trace_len, 1)
    id_v_b = torch.cat(id_valid_b).view(batch_size, trace_len, -1).to(device)
    j_v_b = torch.cat(j_valid_b).view(batch_size, trace_len).to(device)                         #dim: (batch_size, trace_len)

    selected_traj_mask = j_v_b.sum(1) >= sub_trace_len
    if torch.sum(selected_traj_mask).item() == 0:
        return

    selected_lengths = j_v_b.sum(1)[selected_traj_mask]

    s_b = torch.split_with_sizes(s_b[selected_traj_mask][j_v_b[selected_traj_mask]], list(selected_lengths))
    s_next_b = torch.split_with_sizes(s_next_b[selected_traj_mask][j_v_b[selected_traj_mask]], list(selected_lengths))

    avail_next_j_a_b = avail_next_j_a_b[selected_traj_mask][j_v_b[selected_traj_mask]]
    id_a_b = id_a_b[selected_traj_mask][j_v_b[selected_traj_mask]]
    j_a_b = j_a_b[selected_traj_mask][j_v_b[selected_traj_mask]]
    j_r_b = j_r_b[selected_traj_mask][j_v_b[selected_traj_mask]]
    gamma_b = gamma_b[selected_traj_mask][j_v_b[selected_traj_mask]]
    t_b = t_b[selected_traj_mask][j_v_b[selected_traj_mask]]
    id_v_b = id_v_b[selected_traj_mask][j_v_b[selected_traj_mask]]


    # get mask and padd sequence with different lenghts
    mask_s_b = get_mask_from_input(s_b)
    mask_s_next_b = get_mask_from_input(s_next_b)
    padded_s_b = pad_sequence(s_b, padding_value=torch.tensor(0), batch_first=True) 
    padded_s_next_b = pad_sequence(s_next_b, padding_value=torch.tensor(0), batch_first=True) 
    padded_s_next_b = torch.cat([padded_s_b[:,0].unsqueeze(1),
                                 padded_s_next_b],
                                 dim=1)
    if rnn:
        Q_s = policy_net(padded_s_b)[0]
        Q_s_next = policy_net(padded_s_next_b)[0][:,1:,:]
    else:
        Q_s  = policy_net(padded_s_b)
        Q_s_next  = policy_net(padded_s_next_b)


    Q_s = Q_s[mask_s_b]
    Q_s_next = Q_s_next[mask_s_next_b]
    assert Q_s.size(0) == j_a_b.size(0), "number of Qs doesn't match with number of actions"

    Q = Q_s.gather(1, j_a_b)

    # apply double Q learning
    # get conditional action indexes
    condi_a = get_conditional_action(id_a_b, id_v_b)
    j_a_next_b = get_conditional_argmax(Q_s_next, condi_a, avail_next_j_a_b, env.n_action)

    if rnn:
        target_Q_s_next = target_net(padded_s_next_b)[0].detach()[:,1:,:]
    else:
        target_Q_s_next = target_net(padded_s_next_b).detach()
    target_Q_s_next = target_Q_s_next[mask_s_next_b]

    target_Q = target_Q_s_next.gather(1, j_a_next_b)
    target_Q = j_r_b + discount * gamma_b * target_Q * (-t_b + 1)

    if huber_loss:
        cen_controller.loss = F.smooth_l1_loss(Q, target_Q)
    else:
        td_err = (target_Q - Q) 
        td_err = torch.max(hysteretic*td_err, td_err)
        cen_controller.loss = torch.mean(td_err*td_err)
    
    # optimize params for each agent
    if cen_controller.loss is not None:
        cen_controller.optimizer.zero_grad()
        cen_controller.loss.backward()

        if grad_clip:
            assert grad_clip_value is not None, "no grad_clip_value is given"
            for param in cen_controller.policy_net.parameters():
                param.grad.data.clamp_(-grad_clip_value, grad_clip_value)
        elif grad_clip_norm:
            assert grad_clip_max_norm is not None, "no grad_clip_max_norm is given"
            clip_grad_norm_(cen_controller.policy_net.parameters(), grad_clip_max_norm)
        cen_controller.optimizer.step()
        cen_controller.loss = None

def get_mask_from_input(x):
    padded_x = pad_sequence(x, padding_value=torch.tensor(float('nan')), batch_first=True) 
    return ~torch.isnan(padded_x).any(-1)
