# Supplementary material
Source: ML conference proceedings conference paper supplement (https://proceedings.neurips.cc/paper_files/paper/2022/hash/1c153788756d35559c22d105d1182c30-Abstract.html)
Supplement: Supplementary file 1 [file 1c153788756d35559c22d105d1182c30-Supplemental-Conference.zip › Supplementary Material/Code/src/macro_marl/MA_cen_condi_ddrqn/team_cen_condi.py]

import numpy as np
import matplotlib.pyplot as plt
import torch
import pickle
import math
import copy
import random

from torch.optim import Adam, RMSprop
from itertools import chain

from .envs_runner_cen_condi import EnvsRunner
from .model_cen_condi import DDRQN, BN_DDRQN
from .utils.Cen_ctrl import Cen_Controller
from .utils.utils import Linear_Decay, get_conditional_argmax, get_conditional_action, get_joint_avail_actions

# parameters for e-greedy policy
EPS_START = 1.0
EPS_DECAY = 2000
EPS_DECAY_LINEAR_RATE = 0.9999

OPTIMIZERS = {'Adam': Adam,
              'RMSprop': RMSprop}

class Team:

    """Base class of a team of agents"""
    
    def __init__(self, 
                 env, 
                 memory, 
                 n_agent, 
                 h_stable_at, 
                 dynamic_h=False, 
                 hysteretic=None, 
                 discount=0.99,
                 epsilon_end = 0.1, 
                 epsilon_linear_decay=False, 
                 epsilon_linear_decay_steps=0,
                 eval_freq=100):
        """
        Parameters
        ----------
        env : gym.env
            A domain environment.
        memory : ReplayBuffer
            A instance of the ReplayBuffer class.
        n_agent : int
            The number of agent.
        h_stable_at : int
            The number of dacaying episodes/stpes for hysteretic learning rate.
        dynamic_h : bool
            Whether apply hysteratic learning rate decay.
        hysteretic : tuple
            A tuple of initialzed and ending hysteritic learning rates.
        discount : float
            Discount factor for learning.
        epsilon_end : float
            Then ending value of epsilon.
        epsilon_linear_decay : bool
            Whether apply epsilon decay for explorating policy
        epsilon_linear_decay_steps : int
            The number of episodes/steps for epsilon decay
        eval_freq : int
            The frequency to perform evaluation.
        """

        self.env = env
        self.n_agent = n_agent
        self.memory = memory

        self.step_count = 0.0
        self.episode_count = 0.0
        self.episode_rewards = 0.0
 
        # hysteretic settings
        self.dynamic_h = dynamic_h
        (self.init_hysteretic, self.end_hysteretic) = hysteretic
        self.hysteretic = self.init_hysteretic
        self.discount = discount

        # epsilon for e-greedy
        self.epsilon = EPS_START
        self.epsilon_end = epsilon_end
        self.epsilon_linear_decay = epsilon_linear_decay
        self.eps_l_d = Linear_Decay(epsilon_linear_decay_steps, EPS_START, self.epsilon_end)
        
        self.eval_freq = eval_freq

        self.HYSTERESIS_STABLE_AT = h_stable_at

    def create_cen_controller(self):
        raise NotImplementedError

    def step(self):
        raise NotImplementedError

    def get_next_actions(self):
        raise NotImplementedError

    def update_target_net(self):
        self.cen_controller.target_net.load_state_dict(self.cen_controller.policy_net.state_dict())

    def train(self):
        raise NotImplementedError

    def update_epsilon(self, step):
        # update epsilon:
        if self.epsilon_linear_decay:
            #self.epsilon = max(self.epsilon*EPS_DECAY_LINEAR_RATE, EPS_END)
            self.epsilon = self.eps_l_d._get_value(step)
        else:
            self.epsilon = self.epsilon_end + (EPS_START - self.epsilon_end) * math.exp(-1. * (step//8)  / EPS_DECAY)
    
    def update_hysteretic(self, step):
        if self.dynamic_h:
            self.hysteretic = min(self.end_hysteretic,
                                  ((self.end_hysteretic - self.init_hysteretic) / self.HYSTERESIS_STABLE_AT) * step + self.init_hysteretic)
        else:
            self.hysteretic = 1 - self.epsilon
    
    def get_init_inputs(self):
        raise NotImplementedError

    def sep_joint_exps(self, joint_exps):
        raise NotImplementedError

    def evaluate(self):
        raise NotImplementedError

    def load_check_point(self, idx_run):
        for idx, parent in enumerate(self.envs_runner.parents):
            PATH = "./performance/" + self.save_dir + "/check_point/" + str(idx_run) + "_env_rand_state_" + str(idx) + "1.tar"
            rand_states = torch.load(PATH)
            parent.send(('load_rand_states', rand_states))
        PATH = "./performance/" + self.save_dir + "/check_point/" + str(idx_run) + "_cen_controller_" + "1.tar"
        ckpt = torch.load(PATH)
        self.cen_controller.policy_net.load_state_dict(ckpt['policy_net_state_dict'])
        self.cen_controller.target_net.load_state_dict(ckpt['target_net_state_dict'])
        self.cen_controller.optimizer.load_state_dict(ckpt['optimizer_state_dict'])

        self.hysteretic = ckpt['cur_hysteretic']
        self.epsilon = ckpt['cur_eps']
        self.episode_count = ckpt['n_epi']
        self.step_count = ckpt['cur_step']
        self.TEST_PERFORM = ckpt['TEST_PERFORM']
        self.memory.buf = ckpt['mem_buf']
        random.setstate(ckpt['random_state'])
        np.random.set_state(ckpt['np_random_state'])
        torch.set_rng_state(ckpt['torch_random_state'])

class Team_RNN(Team):

    """A instance of Team class with RNN agent"""

    def __init__(self, 
                 env, 
                 env_terminate_step,
                 n_env, 
                 memory, 
                 n_agent, 
                 training_method, 
                 h_stable_at, 
                 discount=0.99, 
                 cen_mode=0, 
                 batch_norm=False, 
                 sample_epi=False, 
                 dynamic_h=False, 
                 hysteretic=None, 
                 h_explore=False, 
                 soft_action_selection=False, 
                 epsilon_end=0.1, 
                 epsilon_linear_decay=False, 
                 epsilon_linear_decay_steps=0, 
                 epsilon_exp_decay=False, 
                 optimizer='Adam', 
                 learning_rate=0.001, 
                 device='cpu', 
                 eval_freq=100,
                 save_dir=None, 
                 nn_model_params={}, 
                 seed=None,
                 **hyper_params):

        """
        Parameters
        ----------
        env : gym.env
            A domain environment.
        n_env : int
            The number of envs running in parallel.
        memory : ReplayBuffer
            A instance of the ReplayBuffer class.
        n_agent : int
            The number of agent.
        training_method : python function
            A algorithm for calculating loss and performing optimization.
        h_stable_at : int
            The number of dacaying episodes/stpes for hysteretic learning rate.
        discount : float
            Discount factor for learning.
        cen_mode : int
            The index of centralized training algorithm.
        batch_norm : bool
            Whether apply batch norm layer or not.
        sample_epi : bool
            Whether simples entire episode in mini-batch learning.
        dynamic_h : bool
            Whether apply hysteratic learning rate decay.
        hysteretic : tuple
            A tuple of initialzed and ending hysteritic learning rates.
        h_explore : bool
            Whether uses history-based exploring policy.
        soft_action_selection : bool
            Whether apply soft action selection.
        epsilon_end : float
            The ending value of epsilon.
        epsilon_linear_decay : bool
            Whether apply epsilon decay for explorating policy
        epsilon_linear_decay_steps : int
            The number of episodes/steps for epsilon decay
        epsilon_exp_decay : bool
            Whether apply exponentially decay for epsilon.
        optimizer : str
            Name of an optimizer.
        learning_rate : float
            Learning rate.
        device : str
            CPU/GPU for training.
        eval_freq : int
            The frequency to perform evaluation.
        save_dir : str
            Name of a directory to save results/ckpt.
        nn_model_params : dict[..]
            A dictionary of network parameters.
        hyper_params : dict[..] 
            A dictionary of some rest hyper-parameters.
        """

        super(Team_RNN, self).__init__(env, memory, n_agent, h_stable_at, dynamic_h, hysteretic, discount,
                                       epsilon_end, epsilon_linear_decay, epsilon_linear_decay_steps, eval_freq=eval_freq)

        # create multiprocessor for multiple envs running parallel
        self.envs_runner = EnvsRunner(self.env, env_terminate_step, self.memory, n_env, h_explore, self.get_next_actions, self.discount, seed)
        self.envs_runner.reset()
        self.n_env = n_env
        self.env_terminate_step = env_terminate_step

        # sample the whole episode for training
        self.sample_epi = sample_epi
        
        # training method
        self.cen_mode = cen_mode
        self.soft_action_selection = soft_action_selection
        self.batch_norm = batch_norm
        self.training_method = training_method
        self.nn_model_params = nn_model_params
        self.hyper_params = hyper_params
        self.optimizer = optimizer
        self.lr = learning_rate
        
        # save model
        self.save_dir = save_dir
        self.device = device

        # statistic of training and testing
        self.TRAIN_PERFORM = []
        self.TEST_PERFORM = []

        # create cen_controller
        self.create_cen_controller()

    def create_cen_controller(self):
        if self.batch_norm:
            self.cen_controller = Cen_Controller()
            self.cen_controller.policy_net = BN_DDRQN(np.sum(self.env.obs_size),np.prod(self.env.n_action), **self.nn_model_params).to(self.device)
            self.cen_controller.target_net = BN_DDRQN(np.sum(self.env.obs_size),np.prod(self.env.n_action), **self.nn_model_params).to(self.device)
            self.cen_controller.target_net.load_state_dict(self.cen_controller.policy_net.state_dict())
            self.cen_controller.optimizer = OPTIMIZERS[self.optimizer](self.cen_controller.policy_net.parameters(), lr=self.lr)
        else:
            self.cen_controller = Cen_Controller()
            self.cen_controller.policy_net = DDRQN(np.sum(self.env.obs_size),np.prod(self.env.n_action), **self.nn_model_params).to(self.device)
            self.cen_controller.target_net = DDRQN(np.sum(self.env.obs_size),np.prod(self.env.n_action), **self.nn_model_params).to(self.device)
            self.cen_controller.target_net.load_state_dict(self.cen_controller.policy_net.state_dict())
            self.cen_controller.optimizer = OPTIMIZERS[self.optimizer](self.cen_controller.policy_net.parameters(), lr=self.lr)

    def step(self, idx_run):
        if self.step_count == 0:
            self.evaluate()
            with open("./performance/" + self.save_dir + "/test/test_perform" + str(idx_run) + ".pickle", 'wb') as handle:
                pickle.dump(self.TEST_PERFORM, handle)

        self.step_count += 1.0

        n_episode_done = self.envs_runner.step()
        self.episode_count += n_episode_done

        if n_episode_done > 0 and not self.episode_count % self.eval_freq:
            self.evaluate()
            if self.TEST_PERFORM[-1] == np.max(self.TEST_PERFORM):
                PATH = "./policy_nns/" + self.save_dir + "/" + str(idx_run) + "_cen_controller.pt"
                torch.save(self.cen_controller.policy_net, PATH)

            if not self.episode_count % (self.eval_freq*10):
                with open("./performance/" + self.save_dir + "/test/test_perform" + str(idx_run) + ".pickle", 'wb') as handle:
                    pickle.dump(self.TEST_PERFORM, handle)

    def get_next_actions(self, 
                         joint_obs, 
                         h_state, 
                         last_action, 
                         last_valid, 
                         avail_actions,
                         eval=False):

        """
        Parameters
        ----------
        joint_obs : ndarry | List[..]
            A list of each agent's observation.
        h_state : ndarry | tuple[..]
            A tuple of hidden state of centralized rnn-net
        last_action : int | List[..]
            A list of indice of agents' previous macro-action.
        last_valid : int | List[..]
            A list of binary values indicates whether each agent has finished the previous macro-action.
        avail_actions : List[List[1/0]]
            Indicate available actions of each agent.
        eval : bool
            Whether use evaluation mode or not.

        Returns
        -------
        actions : int | List[..]
            A list of the index of macro-action for each agent.
        new_h_state : ndarry | tuple(..)
            A tuple of hidden state of centralized rnn-net.
        """

        with torch.no_grad():
            if max(last_valid) == 1.0:
                joint_avail_actions = get_joint_avail_actions(avail_actions)
                self.cen_controller.policy_net.eval()
                Q, h = self.cen_controller.policy_net(torch.cat(joint_obs).view(1,1,np.sum(self.env.obs_size)), h_state)
                # implement conditional argmax, the actions have not been done are conditioned
                a = get_conditional_argmax(Q, 
                                           get_conditional_action(torch.cat(last_action).view(1,-1), 
                                                                  torch.cat(last_valid).view(1,-1)), 
                                           joint_avail_actions, 
                                           self.env.n_action).item()
                if not eval:
                    if self.soft_action_selection:
                        logits = torch.log_softmax((Q/self.epsilon), 1)
                        # get rid of unavailable actions
                        logits = logits.masked_fill(joint_avail_actions==0.0, -float('inf'))
                        a = torch.distributions.Categorical(logits=logits).sample().item()
                    else:
                        if np.random.random() < self.epsilon:
                            prob = joint_avail_actions[0] / torch.sum(joint_avail_actions[0])
                            a = np.random.choice(range(Q.shape[-1]), 1, p=prob.numpy())[0]
                actions = np.unravel_index(a, self.env.n_action)
                new_h_state = h
            else:
                actions = [-1] * self.n_agent
                new_h_state = h_state

        return actions, new_h_state

    def train(self):
        if self.sample_epi:
            batch, trace_len = self.memory.sample()
            batch = self.sep_joint_exps(batch)
            self.hyper_params['trace_len'] = trace_len
        else:
            batch = self.sep_joint_exps(self.memory.sample())
        self.training_method(self.env, self.cen_controller, batch, self.hysteretic, self.discount, **self.hyper_params)

    def get_init_inputs(self):
        return [torch.from_numpy(i).float() for i in self.env.reset()], None

    def sep_joint_exps(self, joint_exps):

        """
        Parameters
        ----------
        joint_exps : List[List[tuple(..)]]
            A sampled batch of episodes/sequences, whose size equals to the number of episodes..

        Return
        ------
        exps : List[List(..)]
            A batch of episdoes/sequences of joint experiences.
        """
 
        # seperate the joint experience for individual agents
        exp = []
        for o, avail_a, a, id_r, j_r, gamma, o_n, avail_a_n, t, id_v, j_v in chain(*joint_exps):
            exp.append([torch.cat(o).view(1,-1), 
                        torch.cat(a).view(1,-1),
                        torch.tensor(np.ravel_multi_index(a, self.env.n_action)).view(1,-1),
                        id_r, 
                        j_r, 
                        gamma,
                        torch.cat(o_n).view(1,-1),
                        get_joint_avail_actions(avail_a_n),
                        t,
                        torch.cat(id_v).view(-1),
                        j_v])
        return exp

    def evaluate(self, n_episode=1):

        R, L = 0, 0

        for _ in range(n_episode):
            t = 0
            step = 0
            last_obs, h_states = self.get_init_inputs()
            last_valid = [torch.tensor([[1]], dtype=torch.bool)] * self.n_agent
            last_action = [torch.tensor([[-1]])] * self.n_agent
            avail_actions = [torch.FloatTensor(avail_action).view(1,-1) for avail_action in self.env.get_avail_actions()]
            while not t and step < self.env_terminate_step:
                a, h_states = self.get_next_actions(last_obs, h_states, last_action, last_valid, avail_actions, eval=True)
                obs, r, t, info = self.env.step(a)
                last_obs = [torch.from_numpy(o).float() for o in obs]
                last_action = [torch.tensor(a_idx).view(1,1) for a_idx in info['cur_mac']]
                last_valid = [torch.tensor(_v, dtype=torch.bool).view(1,-1) for _v in info['mac_done']]
                avail_actions = [torch.FloatTensor(avail_action).view(1,-1) for avail_action in self.env.get_avail_actions()]
                R += self.discount**step * sum(r)/self.env.n_agent
                step += 1

        self.TEST_PERFORM.append(R/n_episode)
