# Supplementary material
Source: ML conference proceedings conference paper supplement (https://proceedings.neurips.cc/paper_files/paper/2022/hash/1c153788756d35559c22d105d1182c30-Abstract.html)
Supplement: Supplementary file 1 [file 1c153788756d35559c22d105d1182c30-Supplemental-Conference.zip › Supplementary Material/Code/src/macro_marl/MA_cen_condi_ddrqn/utils/Cen_ctrl.py]

class Cen_Controller:

    def __init__(self):
        self.policy_net = None
        self.target_net = None
        self.optimizer = None
        self.loss = None
