# Supplementary material
Source: ML conference proceedings conference paper supplement (https://proceedings.neurips.cc/paper_files/paper/2022/hash/1c153788756d35559c22d105d1182c30-Abstract.html)
Supplement: Supplementary file 1 [file 1c153788756d35559c22d105d1182c30-Supplemental-Conference.zip › Supplementary Material/Code/src/macro_marl/MA_cen_condi_ddrqn/utils/utils.py]

import torch
import os
import numpy as np
import string
import random

class Linear_Decay(object):

    def __init__ (self, 
                  total_steps, 
                  init_value, 
                  end_value):
        """
        Parameters
        ----------
        total_steps : int
            Total decay steps.
        init_value : float
            Initial value.
        end_value : float
            Ending value
        """

        self.total_steps = total_steps
        self.init_value = init_value
        self.end_value = end_value

    def _get_value(self, step):
        frac = min(float(step) / self.total_steps, 1.0)
        return self.init_value + frac * (self.end_value-self.init_value)

def get_conditional_argmax(Q, action_idxes, joint_avail_actions,  action_space):
    size = []
    size.append(Q.shape[0])
    size += action_space
    _Q = Q.view(size)
    a_idxes = []
    for q_i in range(_Q.shape[0]):
        N = _Q[q_i].shape
        avail_actions = joint_avail_actions[q_i].reshape(N)
        avail_Q = _Q[q_i].masked_fill(avail_actions==0.0, -float('inf'))
        masks = []
        for i, idx in enumerate(action_idxes[q_i]):
            if idx == -1:
                m = torch.ones(N[i]).byte()
            else:
                m = torch.zeros(N[i]).byte()
                m[idx] = 1
            masks.append(m)
        letters = string.ascii_letters[:avail_Q.ndimension()]
        rule = ','.join(letters) + '->' + letters
        mask = torch.einsum(rule, *masks)
        Qmasked = avail_Q.where(mask, torch.tensor(-float('inf')))
        a_idxes.append(Qmasked.argmax())
    return torch.tensor(a_idxes).view(-1,1)

def get_conditional_action(actions, v):
    condi_a = actions.clone()
    condi_a[v] = -1
    return condi_a 

def get_joint_avail_actions(avail_actions):
    output = torch.ger(avail_actions[0].flatten(), avail_actions[1].flatten()).flatten()
    for i in range(2, len(avail_actions)):
        output = torch.ger(output, avail_actions[i].flatten()).flatten()
    return output.view(1,-1)

def _prune_o(obs, id_valid):

    """Given an joint experience (o,a,o',r), the element in o of Q(o,a) which is learnt 
    should be zero if the previous action is not done yet."""

    assert type(obs) is list, "Obs is not a list"
    n_agent = id_valid[0].shape[-1]
    for i in range(len(obs)):
        id_v = torch.ones_like(id_valid[i])
        id_v[1:] = id_valid[i][0:-1]
        obs[i] = id_v.view(obs[i].shape[0], n_agent, -1).float() * obs[i].view(obs[i].shape[0], n_agent, -1)
        obs[i] = obs[i].reshape(obs[i].shape[0], -1)
    return tuple(obs)

def _prune_o_n(obs, id_valid):

    """Given an experience (o,a,o',r), the element in o' of argmax_a' Q(o',a') 
    should be zero if the current action a is not done yet."""

    assert type(obs) is list, "Obs is not a list"
    n_agent = id_valid[0].shape[-1]
    for i in range(len(obs)):
        obs[i] = id_valid[i].view(obs[i].shape[0], n_agent, -1).float() * obs[i].view(obs[i].shape[0], n_agent, -1)
        obs[i] = obs[i].reshape(obs[i].shape[0], -1)
    return tuple(obs)
 

def _prune_filtered_o(obs, id_valid):
    """Given an joint experience (o,a,o',r), the element in o of Q(o,a) which is learnt 
    should be zero if the previous action is not done yet. Note, the obs has filtered out
    the exp before a new macro-action starts."""

    assert type(obs) is list, "Obs is not a list"
    n_agent = id_valid[0].shape[-1]
    for i in range(len(obs)):
        obs[i] = id_valid[i][:-1].view(obs[i].shape[0], n_agent, -1).float() * obs[i].view(obs[i].shape[0], n_agent, -1)
        obs[i] = obs[i].reshape(obs[i].shape[0], -1)
    return tuple(obs)
 
def _prune_filtered_o_n(obs, id_valid):
    """Given an experience (o,a,o',r), the element in o' of argmax_a' Q(o',a') 
    should be zero if the current action a is not done yet. Note, the obs has filtered out
    the exp before a new macro-action starts."""

    assert type(obs) is list, "Obs is not a list"
    n_agent = id_valid[0].shape[-1]
    for i in range(len(obs)):
        obs[i] = id_valid[i][1:].view(obs[i].shape[0], n_agent, -1).float() * obs[i].view(obs[i].shape[0], n_agent, -1)
        obs[i] = obs[i].reshape(obs[i].shape[0], -1)
    return tuple(obs)

def save_check_point(env, cen_controller, cur_step, n_epi, cur_hysteretic, cur_eps, save_dir, mem, run_id, test_perform):
    for idx, parent in enumerate(env.parents):
        parent.send(('get_rand_states', None))
    for idx, parent in enumerate(env.parents):
        PATH = "./performance/" + save_dir + "/check_point/" + str(run_id) + "_env_rand_state_" + str(idx) + "1.tar"
        rand_states = parent.recv()
        torch.save(rand_states, PATH)
    PATH = "./performance/" + save_dir + "/check_point/" + str(run_id) + "_cen_controller_" + "1.tar"

    torch.save({
                'cur_step': cur_step,
                'n_epi': n_epi,
                'policy_net_state_dict':cen_controller.policy_net.state_dict(),
                'target_net_state_dict':cen_controller.target_net.state_dict(),
                'optimizer_state_dict':cen_controller.optimizer.state_dict(),
                'cur_hysteretic':cur_hysteretic,
                'cur_eps':cur_eps,
                'TEST_PERFORM': test_perform,
                'mem_buf':mem.buf,
                'random_state':random.getstate(),
                'np_random_state': np.random.get_state(),
                'torch_random_state': torch.random.get_rng_state()
                }, PATH)
