# Supplementary material
Source: ML conference proceedings conference paper supplement (https://proceedings.neurips.cc/paper_files/paper/2022/hash/1c153788756d35559c22d105d1182c30-Abstract.html)
Supplement: Supplementary file 1 [file 1c153788756d35559c22d105d1182c30-Supplemental-Conference.zip › Supplementary Material/Code/src/macro_marl/MA_hddrqn/envs_runner.py]

import numpy as np
import random
import torch

from multiprocessing import Process, Pipe

def worker(child, env, gamma, seed):
    """
    Worker function which interacts with the environment over remote
    """
    random.seed(seed)
    np.random.seed(seed)

    try:
        while True:
            # wait cmd sent by parent
            cmd, data = child.recv()
            if cmd == 'step':
                obs, reward, terminate, info = env.step(data)
                actions = info['cur_mac']
                valid = info['mac_done']

                for idx, v in enumerate(valid):
                    if last_valid[idx]:
                        accu_rewards_per_step[idx] = reward[idx]
                        mac_act_step[idx] = 1
                        accu_gamma[idx] = 1
                    else:
                        mac_act_step[idx] += 1
                        accu_rewards_per_step[idx] = accu_rewards_per_step[idx] + gamma**(mac_act_step[idx]-1) * reward[idx]
                        accu_gamma[idx] = gamma**(mac_act_step[idx]-1)

                last_valid = valid
                avail_actions = env.get_avail_actions()

                # sent experience back
                child.send((last_obs, 
                            actions, 
                            accu_rewards_per_step, 
                            accu_gamma,
                            obs, 
                            avail_actions, 
                            terminate, 
                            valid))

                last_obs = obs
                R += gamma**step * sum(reward) / env.n_agent
                step += 1

            elif cmd == 'get_return':
                child.send(R)

            elif cmd == 'reset':
                last_obs =  env.reset()
                last_h = [None] * env.n_agent
                last_valid = [1.0] * env.n_agent
                accu_rewards_per_step = [0.0] * env.n_agent
                accu_gamma = [0.0] * env.n_agent
                mac_act_step = [0] * env.n_agent
                avail_actions = env.get_avail_actions()
                step = 0
                R = 0.0

                child.send((last_obs, last_h, last_valid, avail_actions))
            elif cmd == 'close':
                child.close()
                break
            elif cmd == 'get_rand_states':
                rand_states = {'random_state': random.getstate(),
                               'np_random_state': np.random.get_state()}
                child.send(rand_states)
            elif cmd == 'load_rand_states':
                random.setstate(data['random_state'])
                np.random.set_state(data['np_random_state'])
            else:
                raise NotImplementerError
 
    except KeyboardInterrupt:
        print('EnvRunner worker: caught keyboard interrupt')
    except Exception as e:
        print('EnvRunner worker: uncaught worker exception')
        raise

class EnvsRunner(object):

    """
    Environment runner which runs multiple environemnts in parallel in subprocesses
    and communicates with them via pipe
    """

    def __init__(self, 
                 env, 
                 env_terminate_step,
                 memory, 
                 n_env, 
                 h_explore, 
                 get_actions,
                 gamma,
                 seed,
                 writer=None,
                 log=False):

        """
        Parameters
        ----------
        env : gym.env
            A macro-action-based gym envrionment.
        memory : ReplayBuffer
            An instance of RepalyBuffer class.
        n_env : int
            The number of envs running in parallel.
        h_explore : bool
            Whether use history-based policy for rollout.
        get_actions : python function
            A function for getting macro-actions 
        """
        
        self.n_env = n_env
        self.env_terminate_step = env_terminate_step
        # func for getting next action via current policy nn
        self.get_actions = get_actions
        # create connections via Pipe
        self.parents, self.children = [list(i) for i in zip(*[Pipe() for _ in range(n_env)])]
        # create multip processor with multiple envs
        self.envs = [Process(target=worker, args=(child, env, gamma, seed)) for child in self.children]
        # replay buffer
        self.memory = memory
        # log for tensorboard
        self.writer = writer
        self.log = log
        self.epi_count = 0

        self.hidden_states = [None] * n_env
        self.h_explore = h_explore
        self.episodes = [[]] * n_env

        # trigger each processor
        for env in self.envs:
            env.daemon = True
            env.start()

        for child in self.children:
            child.close()

    def step(self):

        n_episode_done = 0

        for idx, parent in enumerate(self.parents):
            # get next action
            if self.h_explore:
                actions, self.h_states[idx] = self.get_actions(self.last_obses[idx], 
                                                               self.h_states[idx], 
                                                               self.last_valids[idx], 
                                                               self.avail_actions[idx])
            else:
                actions, self.hidden_states[idx] = self.get_actions(self.last_obses[idx], 
                                                                    self.h_states[idx], 
                                                                    self.last_valids[idx], 
                                                                    self.avail_actions[idx])

            # send cmd to trigger env step
            parent.send(("step", actions))
            self.step_count[idx] += 1 

        # collect envs' returns
        for idx, parent in enumerate(self.parents):
            # env_return is (last_obs, a, acc_r, obs, avail_a, t, v)
            env_return = parent.recv()
            env_return = self.exp_to_tensor(idx, env_return)
            self.episodes[idx].append(env_return)

            self.last_obses[idx] = env_return[5]
            self.avail_actions[idx] = env_return[6]
            self.last_valids[idx] = env_return[8]

            # if episode is done, add it to memory buffer
            if env_return[-2] or self.step_count[idx] == self.env_terminate_step:
                n_episode_done += 1
                self.epi_count += 1
                if self.log:
                    # collect the return
                    parent.send(("get_return", None))
                    R = parent.recv()
                    self.writer.add_scalar('Return/train/', R, self.epi_count)
                self.memory.scenario_cache += self.episodes[idx]
                self.memory.flush_scenario_cache()

                # when episode is done, immediately start a new one
                parent.send(("reset", None))
                self.last_obses[idx], self.h_states[idx], self.last_valids[idx], self.avail_actions[idx] = parent.recv()
                self.last_obses[idx] = self.obs_to_tensor(self.last_obses[idx])
                self.avail_actions[idx] = self.avail_action_to_tensor(self.avail_actions[idx])
                self.episodes[idx] = []
                self.step_count[idx] = 0
                continue

        return n_episode_done

    def reset(self):
        # send cmd to reset envs
        for parent in self.parents:
            parent.send(("reset", None))

        self.last_obses, self.h_states, self.last_valids, self.avail_actions = [list(i) for i in zip(*[parent.recv() for parent in self.parents])]
        self.last_obses = [self.obs_to_tensor(obs) for obs in self.last_obses]
        self.avail_actions = [self.avail_action_to_tensor(avail_action) for avail_action in self.avail_actions]
        self.step_count = [0] * self.n_env

    def close(self):
        [parent.send(('close', None)) for parent in self.parents]
        [parent.close() for parent in self.parents]
        [env.terminate() for env in self.envs]
        [env.join() for env in self.envs]

    def obs_to_tensor(self, obs):
        return [torch.from_numpy(o).float() for o in obs]

    def avail_action_to_tensor(self, avail_action):
        return [torch.FloatTensor(a) for a in avail_action]

    def exp_to_tensor(self, env_idx, exp):
        last_obs = [torch.from_numpy(o).float() for o in exp[0]]
        last_avail_actions = [torch.FloatTensor(avail_action) for avail_action in self.avail_actions[env_idx]]
        a = [torch.tensor(a).view(1,-1) for a in exp[1]]
        r = [torch.tensor(r).float().view(1,-1) for r in exp[2]]
        gamma = [torch.tensor(g).float().view(1,-1) for g in exp[3]]
        obs = [torch.from_numpy(o).float() for o in exp[4]]
        avail_actions = [torch.FloatTensor(avail_action).view(1,-1) for avail_action in exp[5]]
        t = torch.tensor(exp[6]).float().view(1,-1)
        v = [torch.tensor(v, dtype=torch.bool).view(1,-1) for v in exp[7]]
        return (last_obs, last_avail_actions, a, r, gamma, obs, avail_actions, t, v)
