# Supplementary material
Source: ML conference proceedings conference paper supplement (https://proceedings.neurips.cc/paper_files/paper/2022/hash/1c153788756d35559c22d105d1182c30-Abstract.html)
Supplement: Supplementary file 1 [file 1c153788756d35559c22d105d1182c30-Supplemental-Conference.zip › Supplementary Material/Code/src/macro_marl/MA_hddrqn/utils/Agent.py]

class Agent:

    """A class of an agent"""

    def __init__(self):
        self.idx = None
        self.policy_net = None
        self.target_net = None
        self.optimizer = None
        self.loss = None
