# Supplementary material
Source: ML conference proceedings conference paper supplement (https://proceedings.neurips.cc/paper_files/paper/2022/hash/1c153788756d35559c22d105d1182c30-Abstract.html)
Supplement: Supplementary file 1 [file 1c153788756d35559c22d105d1182c30-Supplemental-Conference.zip › Supplementary Material/Code/src/macro_marl/MA_hddrqn/utils/utils.py]

import torch
import os
import numpy as np
import random
import pickle

from IPython.core.debugger import set_trace

class Linear_Decay(object):
    
    """A class for achieving value linear decay"""

    def __init__ (self, 
                  total_steps, 
                  init_value, 
                  end_value):
        """
        Parameters
        ----------
        total_steps : int
            Total decay steps.
        init_value : float
            Initial value.
        end_value : float
            Ending value
        """
        self.total_steps = total_steps
        self.init_value = init_value
        self.end_value = end_value

    def _get_value(self, step):
        frac = min(float(step) / self.total_steps, 1.0)
        return self.init_value + frac * (self.end_value-self.init_value)

def save_check_point(env,
                     Agents, 
                     cur_step, 
                     n_epi, 
                     cur_hysteretic, 
                     cur_eps, 
                     save_dir, 
                     mem, 
                     run_id, 
                     test_perform):

    """
    Parameters
    ----------
    Agents : Agent | List[..]
        A list of agent represented by an instance of Agent class.
    cur_step : int
        Current training step.
    n_epi : int
        Current training episode.
    cur_hysteretic : float
        Current hysteritic learning rate
    cur_eps : float
        Current epslion value.
    save_dir : str
        Directory name for saving ckpt
    mem : RepalyMemory 
        Replay buffer.
    run_id : int
        Index of current run.
    test_perform : float | List[..]
        A list of testing discounted return
    max_save : int
        How many recent ckpt to be kept there.
    """

    for idx, parent in enumerate(env.parents):
        parent.send(('get_rand_states', None))
    for idx, parent in enumerate(env.parents):
        PATH = "./performance/" + save_dir + "/check_point/" + str(run_id) + "_env_rand_state_" + str(idx) + "1.tar"
        rand_states = parent.recv()
        torch.save(rand_states, PATH)
    PATH = "./performance/" + save_dir + "/check_point/" + str(run_id) + "_trainInfo_" + "1.tar"
    torch.save({
                'cur_step': cur_step,
                'n_epi': n_epi,
                'cur_hysteretic':cur_hysteretic,
                'cur_eps':cur_eps,
                'TEST_PERFORM': test_perform,
                'mem_buf':mem.buf,
                'random_state':random.getstate(),
                'np_random_state': np.random.get_state(),
                'torch_random_state': torch.random.get_rng_state()
                }, PATH)
    for idx, agent in enumerate(Agents):
        PATH = "./performance/" + save_dir + "/check_point/" + str(run_id) + "_agent_" + str(idx) + "1.tar"
        torch.save({
                    'policy_net_state_dict':agent.policy_net.state_dict(),
                    'target_net_state_dict':agent.target_net.state_dict(),
                    'optimizer_state_dict':agent.optimizer.state_dict(),
                    }, PATH)

def get_masked_Q(Q, avail_action):
    masked_Q = Q.clone()
    return  masked_Q.masked_fill(avail_action==0.0, -float('inf'))
