# Supplementary material
Source: ML conference proceedings conference paper supplement (https://proceedings.neurips.cc/paper_files/paper/2022/hash/1c153788756d35559c22d105d1182c30-Abstract.html)
Supplement: Supplementary file 1 [file 1c153788756d35559c22d105d1182c30-Supplemental-Conference.zip › Supplementary Material/Code/src/macro_marl/MA_iac_rnn_V/memory.py]

import numpy as np
import torch

from collections import deque

class Memory:

    """Base class of a memory buffer"""

    def __init__(self, 
                 obs_dims, 
                 action_dims, 
                 obs_last_action=False, 
                 size=1):

        self.buf = deque(maxlen=size)

        self.n_agent = len(obs_dims)

        if not obs_last_action:
            self.ZERO_OBS = [torch.zeros(dim).view(1,-1) for dim in obs_dims]
        else:
            self.ZERO_OBS = [torch.zeros(o_dim+a_dim).view(1,-1) for o_dim, a_dim in zip(*[obs_dims, action_dims])]
        self.ZERO_ACT = [torch.tensor(0).view(1,-1)] * self.n_agent
        self.ZERO_REWARD = [torch.tensor(0.0).view(1,-1)] * self.n_agent
        self.ZERO_TERMINATE = torch.tensor(0.0).view(1,-1)
        self.ZERO_AVAIL_ACT = [torch.zeros(a_dim).view(1,-1) for a_dim in action_dims]
        self.ZERO_VALID = [torch.tensor(0, dtype=torch.bool).view(1,-1)] * self.n_agent
        self.ZERO_EXPV = [torch.tensor(0.0).view(1,-1)]*self.n_agent

        self.ZERO_PADDING = [(self.ZERO_OBS,
                              self.ZERO_AVAIL_ACT,
                              self.ZERO_ACT,
                              self.ZERO_REWARD,
                              self.ZERO_OBS,
                              self.ZERO_AVAIL_ACT,
                              self.ZERO_TERMINATE,
                              self.ZERO_VALID,
                              self.ZERO_EXPV)]

    def append(self, transition):
        self.scenario_cache.append(transition)

    def flush_buf_cache(self):
        raise NotImplementedError

    def sample(self):
        raise NotImplementedError
    
    def _scenario_cache_reset(self):
        raise NotImplementedError

class Memory_rand(Memory):

    def __init__(self, trace_len, *args, **kwargs):
        super(Memory_rand, self).__init__(*args, **kwargs)
        self.trace_len = trace_len
        self.buf = deque()
        self.scenario_cache_reset()

    def flush_buf_cache(self):
        for i in range(len(self.scenario_cache)):
            trace = self.scenario_cache[i:i+self.trace_len]
            # end-of-episode padding
            trace = trace + self.ZERO_PADDING * (self.trace_len - len(trace))
            self.buf.append(trace)
        self.scenario_cache_reset()

    def scenario_cache_reset(self):
        self.scenario_cache = self.ZERO_PADDING * (self.trace_len - 1)

    def sample(self):
        return list(self.buf), self.trace_len, None

class Memory_epi(Memory):
    
    def __init__(self, *args, **kwargs):
        super(Memory_epi, self).__init__(*args, **kwargs)
        self._scenario_cache_reset()

    def flush_buf_cache(self):
        self.buf.append(self.scenario_cache)
        self._scenario_cache_reset()
    
    def sample(self):
        batch = list(self.buf)
        return self._padding_batches(batch)

    def _scenario_cache_reset(self):
        self.scenario_cache = []

    def _padding_batches(self, batch):
        epi_len = [len(epi) for epi in batch] 
        max_len = max(epi_len)
        batch = [epi + self.ZERO_PADDING * (max_len - len(epi)) for epi in batch]
        return batch, max_len, epi_len
