# Supplementary material
Source: ML conference proceedings conference paper supplement (https://proceedings.neurips.cc/paper_files/paper/2022/hash/1c153788756d35559c22d105d1182c30-Abstract.html)
Supplement: Supplementary file 1 [file 1c153788756d35559c22d105d1182c30-Supplemental-Conference.zip › Supplementary Material/Code/src/macro_marl/MA_niacc_rnn_V/learner_1.py]

import torch
import copy
import numpy as np

from torch.optim import Adam
from torch.nn.utils import clip_grad_value_, clip_grad_norm_
from torch.nn.utils.rnn import pad_sequence

from itertools import chain
from .models import Critic

class Learner_1(object):
    
    def __init__(self, 
                 env, 
                 controller, 
                 memory, 
                 gamma, 
                 obs_last_action=False,
                 a_lr=1e-2, 
                 c_lr=1e-2, 
                 c_mlp_layer_size=64, 
                 c_rnn_layer_size=64,
                 c_train_iteration=1, 
                 c_target_update_freq=50, 
                 tau=0.01,
                 grad_clip_value=None, 
                 grad_clip_norm=None,
                 n_step_TD=0, 
                 TD_lambda=0.0,
                 device='cpu'):

        self.env = env
        self.n_agent = env.n_agent
        self.controller = controller
        self.memory = memory
        self.gamma = gamma

        self.a_lr = a_lr
        self.c_lr = c_lr
        self.c_mlp_layer_size = c_mlp_layer_size
        self.c_rnn_layer_size = c_rnn_layer_size
        self.c_train_iteration = c_train_iteration
        self.c_target_update_freq = c_target_update_freq
        self.obs_last_action = obs_last_action
        self.tau = tau
        self.grad_clip_value = grad_clip_value
        self.grad_clip_norm = grad_clip_norm
        self.n_step_TD = n_step_TD
        self.TD_lambda = TD_lambda
        self.device = device

        self._create_joint_critic()
        self._set_optimizer()

    def train(self, eps, c_hys_value, adv_hys_value, etrpy_w, critic_hys=False, adv_hys=False):

        batch, trace_len, epi_len = self.memory.sample()
        batch_size = len(batch)

        ############################# train centralized critic ###################################
        cen_batch = self._cat_joint_exps(batch)
        cen_batch, cen_trace_len, cen_epi_len = self._squeeze_cen_exp(cen_batch, 
                                                                      batch_size, 
                                                                      trace_len)

        jobs, reward, n_jobs, terminate, exp_valid = cen_batch

        if jobs.shape[1] == 0:
            return

        ##############################  calculate critic loss and optimize the critic_net ####################################

        for _ in range(self.c_train_iteration):
            if not self.TD_lambda:
                # NOTE WE SHOULD NOT BACKPROPAGATE CRITIC_NET BY N_STATE
                Gt = self._get_bootstrap_return(reward, 
                                                torch.cat([jobs[:,0].unsqueeze(1),
                                                           n_jobs],
                                                           dim=1),
                                                terminate, 
                                                cen_epi_len, 
                                                self.joint_critic_tgt_net)
            else:
                Gt = self._get_td_lambda_return(jobs.shape[0], 
                                                cen_trace_len, 
                                                cen_epi_len, 
                                                reward, 
                                                torch.cat([jobs[:,0].unsqueeze(1),
                                                           n_jobs],
                                                           dim=1),
                                                terminate, 
                                                self.joint_critic_tgt_net)

            TD = Gt - self.joint_critic_net(jobs)[0]
            if critic_hys:
                TD = torch.max(TD*c_hys_value, TD)
            joint_critic_loss = torch.sum(exp_valid * TD * TD) / exp_valid.sum()
            self.joint_critic_optimizer.zero_grad()
            joint_critic_loss.backward()
            if self.grad_clip_value:
                clip_grad_value_(self.joint_critic_net.parameters(), self.grad_clip_value)
            if self.grad_clip_norm:
                clip_grad_norm_(self.joint_critic_net.parameters(), self.grad_clip_norm)
            self.joint_critic_optimizer.step()

        bootstrap_values = self.joint_critic_tgt_net(torch.cat([jobs[:,0].unsqueeze(1),
                                                                n_jobs],
                                                                dim=1))[0].detach()[:,1:,:] 
        V_values = self.joint_critic_net(jobs)[0].detach()

        ##############################  calculate actor loss and optimize actors ####################################

        dec_batches = self._sep_joint_exps(batch)
        dec_batches, j_trace_lens, j_epi_lens, epi_lens = self._squeeze_dec_exp(dec_batches, 
                                                                                batch_size, 
                                                                                trace_len)

        for agent, batch, j_trace_len, j_epi_len, epi_len in zip(self.controller.agents, 
                                                                dec_batches, 
                                                                j_trace_lens, 
                                                                j_epi_lens,
                                                                epi_lens):

            (obs, 
             action, 
             reward, 
             j_reward,
             terminate,
             discount, 
             exp_valid,
             mac_st,
             mac_done) = batch

            if obs.shape[1] == 0:
                continue

            if not self.TD_lambda:
                Gt = self._get_local_bootstrap_return(reward, 
                                                      j_reward,
                                                      bootstrap_values,
                                                      terminate,
                                                      j_epi_len)
            else:
                Gt = self._get_local_td_lambda_return(j_reward,shape[0],
                                                      j_trace_len,
                                                      j_epi_len,
                                                      reward,
                                                      j_reward,
                                                      bootstrap_values,
                                                      terminate)
            
            Gt = torch.split_with_sizes(Gt[mac_done], list(epi_len))
            Gt = pad_sequence(Gt, padding_value=torch.tensor(0.0), batch_first=True).to(self.device)
            V_value = torch.split_with_sizes(V_values[mac_st], list(epi_len))
            V_value = pad_sequence(V_value, padding_value=torch.tensor(0.0), batch_first=True).to(self.device)
            adv = Gt - V_value

            action_logits = agent.actor_net(obs, eps=eps)[0]
            # log_pi(a|s) 
            log_pi_a = action_logits.gather(-1, action)
            # H(pi(.|s)) used as exploration bonus
            pi_entropy = torch.distributions.Categorical(logits=action_logits).entropy().view(obs.shape[0], 
                                                                                              obs.shape[1], 
                                                                                              1)
            # actor loss
            actor_loss = torch.sum(exp_valid * discount * (log_pi_a * adv + etrpy_w * pi_entropy), dim=1)
            agent.actor_loss = -1 * torch.sum(actor_loss) / exp_valid.sum()

            ############################# optimize each actor-net ########################################
            agent.actor_optimizer.zero_grad()
            agent.actor_loss.backward()
            if self.grad_clip_value:
                clip_grad_value_(agent.actor_net.parameters(), self.grad_clip_value)
            if self.grad_clip_norm:
                clip_grad_norm_(agent.actor_net.parameters(), self.grad_clip_norm)
            agent.actor_optimizer.step()

    def update_critic_target_net(self, soft=False):
        if not soft:
            self.joint_critic_tgt_net.load_state_dict(self.joint_critic_net.state_dict())
        else:
            with torch.no_grad():
                for q, q_targ in zip(self.joint_critic_net.parameters(), self.joint_critic_tgt_net.parameters()):
                    q_targ.data.mul_(1 - self.tau)
                    q_targ.data.add_(self.tau * q.data)

    def update_actor_target_net(self, soft=False):
        for agent in self.controller.agents:
            if not soft:
                agent.actor_tgt_net.load_state_dict(agent.actor_net.state_dict())
            else:
                with torch.no_grad():
                    for q, q_targ in zip(agent.actor_net.parameters(), agent.actor_tgt_net.parameters()):
                        q_targ.data.mul_(1 - self.tau)
                        q_targ.data.add_(self.tau * q.data)

    def _create_joint_critic(self):
        input_dim = self._get_input_shape()
        self.joint_critic_net = Critic(input_dim, 1, self.c_mlp_layer_size, self.c_rnn_layer_size)
        self.joint_critic_tgt_net = Critic(input_dim, 1, self.c_mlp_layer_size, self.c_rnn_layer_size)
        self.joint_critic_tgt_net.load_state_dict(self.joint_critic_net.state_dict())

    def _get_input_shape(self):
        if not self.obs_last_action:
            return sum(self.env.obs_size)
        else:
            return sum([o_dim + a_dim for o_dim, a_dim in zip(*[self.env.obs_size, self.env.n_action])])

    def _set_optimizer(self):
        for agent in self.controller.agents:
            agent.actor_optimizer = Adam(agent.actor_net.parameters(), lr=self.a_lr)
        self.joint_critic_optimizer = Adam(self.joint_critic_net.parameters(), lr=self.c_lr)

    def _sep_joint_exps(self, joint_exps):

        """
        seperate the joint experience for individual agents
        """

        exps = [[] for _ in range(self.n_agent)]
        for o, a_st, avail_a, a, r, j_r, n_o, n_avail_a, t, mac_v, j_mac_v, exp_v in chain(*joint_exps):
            for i in range(self.n_agent):
                exps[i].append([o[i], 
                                a_st[i],
                                max(a_st),
                                a[i], 
                                r[i], 
                                j_r,
                                t, 
                                mac_v[i], 
                                j_mac_v,
                                exp_v[i]])
        return exps

    def _cat_joint_exps(self, joint_exps):

        """
        seperate the joint experience for individual agents
        """

        exps = []
        for o, a_st, avail_a, a, r, j_r, n_o, n_avail_a, t, mac_v, j_mac_v, exp_v in chain(*joint_exps):
            exps.append([torch.cat(o, dim=1).view(1,-1), 
                         j_r, 
                         torch.cat(n_o, dim=1).view(1,-1), 
                         t, 
                         j_mac_v,
                         exp_v[0]])
        return exps

    def _squeeze_dec_exp(self, dec_batches, batch_size, trace_len):

        """
        squeeze experience for each agent and re-padding
        """

        squ_dec_batches = []
        squ_j_epi_lens = []
        squ_epi_lens = []
        squ_trace_lens = []

        for idx, batch in enumerate(dec_batches):
            # seperate elements in the batch
            (obs_b, 
             action_start_b,
             jaction_start_b,
             action_b, 
             reward_b, 
             j_reward_b,
             terminate_b, 
             mac_valid_b, 
             j_mac_valid_b,
             exp_valid_b) = zip(*batch)

            o_b = torch.cat(obs_b).view(batch_size, trace_len, -1)
            a_st_b = torch.cat(action_start_b).view(batch_size, trace_len)
            ja_st_b = torch.cat(jaction_start_b).view(batch_size, trace_len)
            a_b = torch.cat(action_b).view(batch_size, trace_len, -1)
            r_b = torch.cat(reward_b).view(batch_size, trace_len, -1)
            j_r_b = torch.cat(j_reward_b).view(batch_size, trace_len, -1)
            t_b = torch.cat(terminate_b).view(batch_size, trace_len, -1)
            mac_v_b = torch.cat(mac_valid_b).view(batch_size, trace_len)
            j_mac_v_b = torch.cat(j_mac_valid_b).view(batch_size, trace_len)
            exp_v_b = torch.cat(exp_valid_b).view(batch_size, trace_len, -1)

            if not (a_st_b.sum(1) == mac_v_b.sum(1)).all():
                self._mac_start_filter(a_st_b, mac_v_b)
            if not (ja_st_b.sum(1) == j_mac_v_b.sum(1)).all():
                self._mac_start_filter(ja_st_b, j_mac_v_b)
            assert all(a_st_b.sum(1) == mac_v_b.sum(1)), "mask for mac strat does not match with mask of mac done ..."
            assert all(ja_st_b.sum(1) == j_mac_v_b.sum(1)), "mask for joint mac strat does not match with mask of joint mac done ..."

            squ_j_epi_len = j_mac_v_b.sum(1)
            squ_r_b = torch.split_with_sizes(r_b[j_mac_v_b], list(squ_j_epi_len))
            squ_j_r_b = torch.split_with_sizes(j_r_b[j_mac_v_b], list(squ_j_epi_len))
            squ_t_b = torch.split_with_sizes(t_b[j_mac_v_b], list(squ_j_epi_len))
            squ_mac_v_b = torch.split_with_sizes(mac_v_b[j_mac_v_b], list(squ_j_epi_len))
            squ_r_b = pad_sequence(squ_r_b, padding_value=torch.tensor(0.0), batch_first=True).to(self.device)
            squ_j_r_b = pad_sequence(squ_j_r_b, padding_value=torch.tensor(0.0), batch_first=True).to(self.device)
            squ_t_b = pad_sequence(squ_t_b, padding_value=torch.tensor(1.0), batch_first=True).to(self.device)
            squ_mac_v_b = pad_sequence(squ_mac_v_b, padding_value=torch.tensor(0.0), batch_first=True).to(self.device)
            assert (squ_mac_v_b.sum(1) == mac_v_b.sum(1)).all(), "number of bootstrap_values will mismatch with local termination exp ... "
            squ_mac_st_b = torch.split_with_sizes(a_st_b[ja_st_b], list(squ_j_epi_len))
            squ_mac_st_b = pad_sequence(squ_mac_st_b, padding_value=torch.tensor(0.0), batch_first=True).to(self.device)
            assert (squ_mac_v_b.sum(1) == squ_mac_st_b.sum(1)).all(), "number of macro-action launched mismatch with number of macro-actions done"

            # squeeze process
            squ_epi_len = mac_v_b.sum(1)
            squ_o_b = torch.split_with_sizes(o_b[mac_v_b], list(squ_epi_len))
            squ_a_b = torch.split_with_sizes(a_b[mac_v_b], list(squ_epi_len))
            squ_exp_v_b = torch.split_with_sizes(exp_v_b[mac_v_b], list(squ_epi_len))

            # re-padding
            squ_o_b = pad_sequence(squ_o_b, padding_value=torch.tensor(0.0), batch_first=True).to(self.device)
            squ_a_b = pad_sequence(squ_a_b, padding_value=torch.tensor(0.0), batch_first=True).to(self.device)
            squ_gamma_b = torch.pow(torch.ones(squ_o_b.shape[0],1)*self.gamma, torch.arange(squ_o_b.shape[1])).unsqueeze(-1).to(self.device) 
            squ_exp_v_b = pad_sequence(squ_exp_v_b, padding_value=torch.tensor(0.0), batch_first=True).to(self.device)

            squ_dec_batches.append((squ_o_b,
                                    squ_a_b,
                                    squ_r_b,
                                    squ_j_r_b,
                                    squ_t_b,
                                    squ_gamma_b,
                                    squ_exp_v_b,
                                    squ_mac_st_b,
                                    squ_mac_v_b))

            squ_j_epi_lens.append(squ_j_epi_len)
            squ_epi_lens.append(squ_epi_len)
            squ_trace_lens.append(squ_r_b.shape[1])

        return squ_dec_batches, squ_trace_lens, squ_j_epi_lens, squ_epi_lens

    def _mac_start_filter(self, mac_start, mac_end):

        mask = mac_start.sum(1) != mac_end.sum(1)
        selected_items = mac_start[mask]
        indices = torch.cat([i[-1].view(-1,2) for i in torch.split_with_sizes(selected_items.nonzero(as_tuple=False), 
                                                                              list(selected_items.sum(1)))], 
                                                                              dim=0)
        selected_items.scatter_(-1, indices[:,1].view(-1,1), 0.0)
        mac_start[mask] = selected_items

    def _squeeze_cen_exp(self, cen_batch, batch_size, trace_len):

        """
        squeeze experience for each agent and re-padding
        """

        # seperate elements in the batch
        jobs_b, reward_b, next_jobs_b, terminate_b, j_mac_valid_b, exp_valid_b = zip(*cen_batch)
        assert len(jobs_b) == trace_len * batch_size, "number of states mismatch ..."
        assert len(next_jobs_b) == trace_len * batch_size, "number of next states mismatch ..."
        jo_b = torch.cat(jobs_b).view(batch_size, trace_len, -1)
        r_b = torch.cat(reward_b).view(batch_size, trace_len, -1)
        n_jo_b = torch.cat(next_jobs_b).view(batch_size, trace_len, -1)
        t_b = torch.cat(terminate_b).view(batch_size, trace_len, -1)
        j_mac_v_b = torch.cat(j_mac_valid_b).view(batch_size, trace_len)
        exp_v_b = torch.cat(exp_valid_b).view(batch_size, trace_len, -1)

        # squeeze process
        squ_epi_len = j_mac_v_b.sum(1)
        squ_jo_b = torch.split_with_sizes(jo_b[j_mac_v_b], list(squ_epi_len))
        squ_r_b = torch.split_with_sizes(r_b[j_mac_v_b], list(squ_epi_len))
        squ_n_jo_b = torch.split_with_sizes(n_jo_b[j_mac_v_b], list(squ_epi_len))
        squ_t_b = torch.split_with_sizes(t_b[j_mac_v_b], list(squ_epi_len))
        squ_exp_v_b = torch.split_with_sizes(exp_v_b[j_mac_v_b], list(squ_epi_len))

        # re-padding
        squ_jo_b = pad_sequence(squ_jo_b, padding_value=torch.tensor(0.0), batch_first=True).to(self.device)
        squ_r_b = pad_sequence(squ_r_b, padding_value=torch.tensor(0.0), batch_first=True).to(self.device)
        squ_n_jo_b = pad_sequence(squ_n_jo_b, padding_value=torch.tensor(0.0), batch_first=True).to(self.device)
        squ_t_b = pad_sequence(squ_t_b, padding_value=torch.tensor(1.0), batch_first=True).to(self.device)
        squ_exp_v_b = pad_sequence(squ_exp_v_b, padding_value=torch.tensor(0.0), batch_first=True).to(self.device)

        squ_cen_batch = (squ_jo_b,
                         squ_r_b,
                         squ_n_jo_b,
                         squ_t_b,
                         squ_exp_v_b)

        return squ_cen_batch, squ_jo_b.shape[1], squ_epi_len

    def _get_discounted_return(self, reward, n_state, terminate, epi_len, critic_net):
        Gt = copy.deepcopy(reward)
        for epi_idx, epi_r in enumerate(Gt):
            end_step_idx = epi_len[epi_idx]-1
            if not terminate[epi_idx][end_step_idx]:
                # implement last step bootstrap
                epi_r[end_step_idx] += self.gamma * critic_net(n_state[epi_idx].unsqueeze(0))[0].detach()[:,1:,:][0][end_step_idx]
            for idx in range(end_step_idx-1, -1, -1):
                epi_r[idx] = epi_r[idx] + self.gamma * epi_r[idx+1]
        return Gt

    def _get_bootstrap_return(self, reward, n_state, terminate, epi_len, critic_net):
        if self.n_step_TD and self.n_step_TD != 1:
            # implement n-step bootstrap
            bootstrap = critic_net(n_state)[0].detach()[:,1:,:]
            Gt = copy.deepcopy(reward)
            for epi_idx, epi_r in enumerate(Gt):
                end_step_idx = epi_len[epi_idx]-1
                if not terminate[epi_idx][end_step_idx]:
                    epi_r[end_step_idx] += self.gamma * bootstrap[epi_idx][end_step_idx]
                for idx in range(end_step_idx-1, -1, -1):
                    if idx > end_step_idx-self.n_step_TD:
                        epi_r[idx] = epi_r[idx] + self.gamma * epi_r[idx+1]
                    else:
                        epi_r[idx] = self._get_n_step_discounted_bootstrap_return(reward[epi_idx][idx:idx+self.n_step_TD], bootstrap[epi_idx][idx+self.n_step_TD-1])
        else:
            Gt = reward + self.gamma * critic_net(n_state)[0].detach()[:,1:,:] * (-terminate + 1)
        return Gt

    def _get_n_step_discounted_bootstrap_return(self, reward, bootstrap):
        discount = torch.pow(torch.ones(1, 1) * self.gamma, torch.arange(self.n_step_TD)).view(self.n_step_TD, 1)
        Gt = torch.sum(discount * reward) + self.gamma**self.n_step_TD * bootstrap
        return Gt

    def _get_td_lambda_return(self, batch_size, trace_len, epi_len, reward, n_state, terminate, critic_net):
        # calculate MC returns
        Gt = self._get_discounted_return(reward, n_state, terminate, epi_len, critic_net)
        # calculate n-step bootstrap returns
        self.n_step_TD = 0
        n_step_part = self._get_bootstrap_return(reward, n_state, terminate, epi_len, critic_net)
        for n in range(2, trace_len):
            self.n_step_TD=n
            next_n_step_part = self._get_bootstrap_return(reward, n_state, terminate, epi_len, critic_net)
            n_step_part = torch.cat([n_step_part, next_n_step_part], dim=-1)
        # calculate the lmda for n-step bootstrap part
        lmdas = torch.pow(torch.ones(1,1)*self.TD_lambda, torch.arange(trace_len-1)).repeat(trace_len, 1).unsqueeze(0).repeat(batch_size,1,1)
        mask = (torch.arange(trace_len).view(-1,1) + torch.arange(trace_len-1).view(1,-1)).squeeze(0).repeat(batch_size,1,1)
        mask = mask >= epi_len.view(batch_size, -1, 1)-1
        lmdas[mask] = 0.0
        # calculate the lmda for MC part
        MC_lmdas = torch.zeros_like(Gt)
        for epi_id, length in enumerate(epi_len):
            last_step_lmda = torch.pow(torch.ones(1,1)*self.TD_lambda, torch.arange(length-1,-1,-1)).view(-1,1)
            MC_lmdas[epi_id][0:length] += last_step_lmda
        # TD LAMBDA RETURN
        Gt = (1 - self.TD_lambda) * torch.sum(lmdas * n_step_part, dim=-1, keepdim=True) +  MC_lmdas * Gt
        return Gt

    def _get_local_bootstrap_return(self, reward, j_reward, bootstrap, terminate, epi_len):
        if self.n_step_TD and self.n_step_TD != 1:
            # implement n-step bootstrap
            Gt = copy.deepcopy(reward)
            jGt = copy.deepcopy(j_reward)
            for epi_idx, (epi_r, epi_jr) in enumerate(zip(Gt,jGt)):
                end_step_idx = epi_len[epi_idx]-1
                if not terminate[epi_idx][end_step_idx]:
                    epi_jr[end_step_idx] += self.gamma * bootstrap[epi_idx][end_step_idx]
                    epi_r[end_step_idx] += self.gamma * bootstrap[epi_idx][end_step_idx]
                for idx in range(end_step_idx-1, -1, -1):
                    if idx > end_step_idx-self.n_step_TD:
                        epi_jr[idx] = epi_jr[idx] + self.gamma * epi_jr[idx+1]
                        epi_r[idx] = epi_r[idx] + self.gamma * epi_jr[idx+1]
                    else:
                        epi_r[idx] = self._get_local_n_step_discounted_bootstrap_return(reward[epi_idx][idx],
                                                                                  j_reward[epi_idx][idx+1:idx+self.n_step_TD], 
                                                                                  bootstrap[epi_idx][idx+self.n_step_TD-1])
        else:
            Gt = reward + self.gamma * bootstrap * (-terminate + 1)

        return Gt

    def _get_local_n_step_discounted_bootstrap_return(self, reward, j_rewards, bootstrap):
        reward = torch.cat([reward.view(1, -1), j_rewards])
        discount = torch.pow(torch.ones(1, 1) * self.gamma, torch.arange(self.n_step_TD)).view(self.n_step_TD, 1)
        Gt = torch.sum(discount * reward) + self.gamma**self.n_step_TD * bootstrap
        return Gt

    def _get_local_td_lambda_return(self, batch_size, trace_len, epi_len, reward, j_reward, bootstrap, terminate):
        # calculate MC returns
        Gt = self._get_local_discounted_return(j_reward, bootstrap, terminate, epi_len)
        # calculate n-step bootstrap returns
        self.n_step_TD = 0
        n_step_part = self._get_local_bootstrap_return(reward, j_reward, bootstrap, terminate, epi_len)
        for n in range(2, trace_len):
            self.n_step_TD=n
            next_n_step_part = self._get_local_bootstrap_return(reward, j_reward, bootstrap, terminate, epi_len)
            n_step_part = torch.cat([n_step_part, next_n_step_part], dim=-1)
        # calculate the lmda for n-step bootstrap part
        lmdas = torch.pow(torch.ones(1,1)*self.TD_lambda, torch.arange(trace_len-1)).repeat(trace_len, 1).unsqueeze(0).repeat(batch_size,1,1)
        mask = (torch.arange(trace_len).view(-1,1) + torch.arange(trace_len-1).view(1,-1)).squeeze(0).repeat(batch_size,1,1)
        mask = mask >= epi_len.view(batch_size, -1, 1)-1
        lmdas[mask] = 0.0
        # calculate the lmda for MC part
        MC_lmdas = torch.zeros_like(Gt)
        for epi_id, length in enumerate(epi_len):
            last_step_lmda = torch.pow(torch.ones(1,1)*self.TD_lambda, torch.arange(length-1,-1,-1)).view(-1,1)
            MC_lmdas[epi_id][0:length] += last_step_lmda
        # TD LAMBDA RETURN
        Gt = (1 - self.TD_lambda) * torch.sum(lmdas * n_step_part, dim=-1, keepdim=True) +  MC_lmdas * Gt
        return Gt

    def _get_local_discounted_return(self, reward, bootstrap, terminate, epi_len):
        Gt = copy.deepcopy(reward)
        for epi_idx, epi_r in enumerate(Gt):
            end_step_idx = epi_len[epi_idx]-1
            if not terminate[epi_idx][end_step_idx]:
                # implement last step bootstrap
                epi_r[end_step_idx] += self.gamma * bootstrap[epi_idx][end_step_idx]
            for idx in range(end_step_idx-1, -1, -1):
                epi_r[idx] = epi_r[idx] + self.gamma * epi_r[idx+1]
        return Gt
