# Supplementary material
Source: ML conference proceedings conference paper supplement (https://proceedings.neurips.cc/paper_files/paper/2022/hash/1c153788756d35559c22d105d1182c30-Abstract.html)
Supplement: Supplementary file 1 [file 1c153788756d35559c22d105d1182c30-Supplemental-Conference.zip › Supplementary Material/Code/src/macro_marl/my_env/__init__.py]

#!/usr/bin/python

from gym.envs.registration import register
from .overcooked import * 

register(
    id='BP-v0',
    entry_point='macro_marl.my_env.box_pushing:BoxPushing',
)

register(
    id='BP-MA-v0',
    entry_point='macro_marl.my_env.box_pushing_MA:BoxPushing_harder',
)

register(
    id='OSD-S-v4',
    entry_point='macro_marl.my_env.osd_ma_single_room:ObjSearchDelivery_v4',
)

register(
    id='OSD-D-v7',
    entry_point='macro_marl.my_env.osd_ma_double_room:ObjSearchDelivery_v7',
)

# # the child class of v7 where turtlebot "Get Tool" will wait for the time cost by fetch pass tool.
# register(
#     id='OSD-D-v8',
#     entry_point='macro_marl.my_env.osd_ma_double_room:ObjSearchDelivery_v8',
# )


# the child class of v8 random sample positions of two humans (one fast one slow)
register(
    id='OSD-D-v8',
    entry_point='macro_marl.my_env.osd_ma_double_room:ObjSearchDelivery_v8',
)

register(
    id='OSD-T-v0',
    entry_point='macro_marl.my_env.osd_ma_tripple_room:ObjSearchDelivery_v0',
)

register(
    id='OSD-T-v1',
    entry_point='macro_marl.my_env.osd_ma_tripple_room:ObjSearchDelivery_v1',
)

register(
    id='OSD-F-v0',
    entry_point='macro_marl.my_env.osd_ma_four_room:ObjSearchDelivery_v0',
)
