# Supplementary material
Source: ML conference proceedings conference paper supplement (https://proceedings.neurips.cc/paper_files/paper/2022/hash/1c153788756d35559c22d105d1182c30-Abstract.html)
Supplement: Supplementary file 1 [file 1c153788756d35559c22d105d1182c30-Supplemental-Conference.zip › Supplementary Material/Code/src/macro_marl/my_env/osd_ma_tripple_room.py]

#!/usr/bin/python
import gym
import numpy as np
import IPython

from .core_tripple_room import AgentTurtlebot_v7, AgentFetch_v4, AgentFetch_v5, AgentHuman, BeliefWayPoint, MacroAction
from gym import spaces

class ObjSearchDelivery(gym.Env):

    metadata = {
            'render.modes': ['human', 'rgb_array'],
            'video.frames_per_second' : 50
            }

    def __init__(self, 
                 n_objs=3, 
                 terminate_step=150, 
                 human_speed_per_step=[[18,18,18,18], [18,18,18,18], [18,18,18,18]], 
                 TB_move_speed=0.6, 
                 TB_move_noisy=0.0, 
                 TB_move_cost=0.0,
                 fetch_pass_obj_tc=4, 
                 fetch_look_for_obj_tc=6, 
                 fetch_manip_noisy=0.0, 
                 fetch_drop_obj_penalty=-10.0, 
                 delay_delivery_penalty=0.0, 
                 obs_human_wait=False, 
                 render=False,
                 *args, 
                 **kwargs):

        self.n_agent = 3

        #-----------------basic settings for this domain
        self.n_objs = n_objs                             # define the number of different objects needs for each human to finish the whole task
                                                         # remeber change the corresponding argument when change this parameter
        self.n_each_obj = 3                              # total amount of each obj in the env
        self.n_steps_human_task = self.n_objs + 1        # define the number of steps for each human finishing the task 

        #-----------------def belief waypoints
        BWP0 = BeliefWayPoint('WorkArea0', 0, 6.0, 3.0)
        BWP1 = BeliefWayPoint('WorkArea1', 1, 8.0, 3.0)
        BWP2 = BeliefWayPoint('WorkArea2', 2, 8.0, 2.0)
        BWP3 = BeliefWayPoint('ToolRoomWait', 3, 3.0, 2.5)
        BWP4_T0 = BeliefWayPoint('ToolRoomTable', 4, 1.2, 3.7)
        BWP4_T1 = BeliefWayPoint('ToolRoomTable', 4, 1.2, 1.3)

        self.BWPs = [BWP0, BWP1, BWP2, BWP3, BWP4_T0, BWP4_T1]
        self.BWPs_T0 = [BWP0, BWP1, BWP2, BWP3, BWP4_T0]
        self.BWPs_T1 = [BWP0, BWP1, BWP2, BWP3, BWP4_T1]
        
        self.viewer = None
        self.terminate_step = terminate_step

        self.TB_move_speed = TB_move_speed
        self.TB_move_noisy = TB_move_noisy
        self.TB_move_cost = TB_move_cost
        self.fetch_pass_obj_tc = fetch_pass_obj_tc
        self.fetch_look_for_obj_tc = fetch_look_for_obj_tc
        self.fetch_manip_noisy = fetch_manip_noisy
        self.fetch_drop_obj_penalty = fetch_drop_obj_penalty
        self.human_speed = human_speed_per_step

        self.finish_serve_humans = []
        self.obs_human_wait = obs_human_wait

        self.delay_delivery_penalty = delay_delivery_penalty
        self.rendering=render

    @property
    def state_size(self):
        return len(self.get_state())

    @property
    def obs_size(self):
        return [self.observation_space_T.n] * (self.n_agent-1) + [self.observation_space_F.n]

    @property
    def n_action(self):
        return [a.n for a in self.action_spaces]

    def action_space_sample(self, i):
        return np.random.randint(self.action_spaces[i].n)

    @property
    def action_spaces(self):
        return [self.action_space_T] * (self.n_agent-1) + [self.action_space_F]

    def get_avail_actions(self):
        return [self.get_avail_agent_actions(i) for i in range(self.n_agent)]

    def get_avail_agent_actions(self, nth):
        return [1] * self.action_spaces[nth].n

    def get_state(self):
        raise NotImplementedError

    def create_turtlebot_actions(self):
        raise NotImplementedError

    def create_fetch_actions(self):
        raise NotImplementedError

    def createAgents(self):
        raise NotImplementedError

    def createHumans(self):

        #-----------------initialize Three Humans
        Human0 = AgentHuman(0, self.n_steps_human_task, self.human_speed[0], list(range(self.n_objs)))
        Human1 = AgentHuman(1, self.n_steps_human_task, self.human_speed[1], list(range(self.n_objs)))
        Human2 = AgentHuman(2, self.n_steps_human_task, self.human_speed[2], list(range(self.n_objs)))

        self.humans = [Human0, Human1, Human2]
        self.n_human = len(self.humans)
        self.n_human_finished = []   # recording the number of human who has finished his own task
        
    def step(self, actions):
        raise NotImplementedError

    def reset(self):
        
        # reset the agents in this env
        self.createAgents()

        # reset the humans in this env
        for human in self.humans:
            human.reset()
        self.n_human_finished = []
        self.finish_serve_humans = []
        
        self.t = 0   # indicates the beginning of one episode, check _getobs()
        self.count_step = 0

        if self.rendering:
            self.render()

        return self._getobs()

    def _getobs(self):
        raise NotImplementedError

    def render(self, mode='human'):

        mul = 2
        screen_width = 900 * mul
        screen_height = 500 * mul

        if self.viewer is None:
            from macro_marl.my_env import rendering
            self.viewer = rendering.Viewer(screen_width, screen_height)

            line = rendering.Line((0.0, 0.0), (0.0, screen_height))
            line.linewidth.stroke = 60
            line.set_color(0.0, 0.0, 0.0)
            self.viewer.add_geom(line)

            line = rendering.Line((0.0, 0.0), (screen_width, 0.0))
            line.linewidth.stroke = 60
            line.set_color(0.0, 0.0, 0.0)
            self.viewer.add_geom(line)

            line = rendering.Line((screen_width, 0.0), (screen_width, screen_height))
            line.linewidth.stroke = 60
            line.set_color(0.0, 0.0, 0.0)
            self.viewer.add_geom(line)

            line = rendering.Line((0.0, screen_height), (screen_width, screen_height))
            line.linewidth.stroke = 60
            line.set_color(0.0, 0.0, 0.0)
            self.viewer.add_geom(line)

            #--------------------------------draw rooms' boundaries

            for i in range(0,100,2):
                line_tool_room = rendering.Line((400*mul, i*5*mul), (400*mul, (i+1)*5*mul))
                line_tool_room.set_color(0,0,0)
                line_tool_room.linewidth.stroke = 2
                self.viewer.add_geom(line_tool_room)

            for i in range(0,80,2):
                line_WA = rendering.Line((700*mul+i*5*mul, 300*mul), (700*mul+(i+1)*5*mul, 300*mul))
                line_WA.linewidth.stroke = 2
                line_WA.set_color(0,0,0)
                self.viewer.add_geom(line_WA)

            for i in range(0,80,2):
                line_WA = rendering.Line((700*mul, 300*mul+i*5*mul), (700*mul, 300*mul+(i+1)*5*mul))
                line_WA.linewidth.stroke = 2
                line_WA.set_color(0,0,0)
                self.viewer.add_geom(line_WA)
                
            for i in range(0,40,2):
                line_WA = rendering.Line((500*mul+i*5*mul, 300*mul), (500*mul+(i+1)*5*mul, 300*mul))
                line_WA.linewidth.stroke = 2
                line_WA.set_color(0,0,0)
                self.viewer.add_geom(line_WA)

            for i in range(0,40,2):
                line_WA = rendering.Line((500*mul, 300*mul+i*5*mul), (500*mul, 300*mul+(i+1)*5*mul))
                line_WA.linewidth.stroke = 2
                line_WA.set_color(0,0,0)
                self.viewer.add_geom(line_WA)

            for i in range(0,40,2):
                line_WA = rendering.Line((700*mul+i*5*mul, 200*mul), (700*mul+(i+1)*5*mul, 200*mul))
                line_WA.linewidth.stroke = 2
                line_WA.set_color(0,0,0)
                self.viewer.add_geom(line_WA)

            for i in range(0,40,2):
                line_WA = rendering.Line((700*mul, 0+i*5*mul), (700*mul, 0+(i+1)*5*mul))
                line_WA.linewidth.stroke = 2
                line_WA.set_color(0,0,0)
                self.viewer.add_geom(line_WA)
 
            
            #---------------------------draw BW0
            for i in range(len(self.BWPs)):
                BWP = rendering.make_circle(radius=6*mul)
                BWP.set_color(178.0/255.0, 34.0/255.0, 34.0/255.0)
                BWPtrans = rendering.Transform(translation=(self.BWPs[i].xcoord*100*mul, self.BWPs[i].ycoord*100*mul))
                BWP.add_attr(BWPtrans)
                self.viewer.add_geom(BWP)

            #-------------------------------draw table
            tablewidth = 60.0*mul
            tableheight = 125.0*mul
            l,r,t,b = -tablewidth/2.0, tablewidth/2.0, tableheight/2.0, -tableheight/2.0
            table = rendering.FilledPolygon([(l,b), (l,t), (r,t), (r,b)])
            table.set_color(0.43,0.28,0.02)
            tabletrans = rendering.Transform(translation=(175*mul, 250*mul))
            table.add_attr(tabletrans)
            self.viewer.add_geom(table)

            tablewidth = 54.0*mul
            tableheight = 119.0*mul
            l,r,t,b = -tablewidth/2.0, tablewidth/2.0, tableheight/2.0, -tableheight/2.0
            table = rendering.FilledPolygon([(l,b), (l,t), (r,t), (r,b)])
            table.set_color(0.67,0.43,0.02)
            tabletrans = rendering.Transform(translation=(175*mul, 250*mul))
            table.add_attr(tabletrans)
            self.viewer.add_geom(table)

            #-----------------------------draw Fetch
            fetch = rendering.make_circle(radius=30*mul)
            fetch.set_color(*(0.0,0.0,0.0))
            self.fetchtrans = rendering.Transform(translation=(self.agents[2].xcoord*100*mul, self.agents[2].ycoord*100*mul))
            fetch.add_attr(self.fetchtrans)
            self.viewer.add_geom(fetch)

            #-----------------------------draw Fetch
            fetch_c = rendering.make_circle(radius=27*mul)
            fetch_c.set_color(*(0.5, 0.5,0.5))
            self.fetchtrans_c = rendering.Transform(translation=(self.agents[2].xcoord*100*mul, self.agents[2].ycoord*100*mul))
            fetch_c.add_attr(self.fetchtrans_c)
            self.viewer.add_geom(fetch_c)

            #-----------------------------draw Fetch arms
            self.arm2 = rendering.FilledPolygon([(-5.0*mul,-24.0*mul), (-5.0*mul, 24.0*mul), (5.0*mul, 24.0*mul), (5.0*mul, -24.0*mul)])
            self.arm2.set_color(0.0, 0.0, 0.0)
            self.arm2trans = rendering.Transform(translation=(self.agents[2].xcoord*10000*mul+55*mul, self.agents[2].ycoord*100*mul), rotation = -90/180*np.pi)
            self.arm2.add_attr(self.arm2trans)
            self.viewer.add_geom(self.arm2)

            self.arm2_c = rendering.FilledPolygon([(-3.0*mul,-22.0*mul), (-3.0*mul, 22.0*mul), (3.0*mul, 22.0*mul), (3.0*mul, -22.0*mul)])
            self.arm2_c.set_color(0.5, 0.5, 0.5)
            self.arm2trans_c = rendering.Transform(translation=(self.agents[2].xcoord*10000*mul+55*mul, self.agents[2].ycoord*100*mul), rotation = -90/180*np.pi)
            self.arm2_c.add_attr(self.arm2trans_c)
            self.viewer.add_geom(self.arm2_c)

            self.arm1 = rendering.FilledPolygon([(-5.0*mul,-36.0*mul), (-5.0*mul, 36.0*mul), (5.0*mul, 36.0*mul), (5.0*mul, -36.0*mul)])
            self.arm1.set_color(1.0, 1.0, 1.0)
            arm1trans = rendering.Transform(translation=(108*mul, 187*mul), rotation = 15/180*np.pi)
            self.arm1.add_attr(arm1trans)
            self.viewer.add_geom(self.arm1)

            self.arm1_c = rendering.FilledPolygon([(-3.0*mul,-34.0*mul), (-3.0*mul, 34.0*mul), (3.0*mul, 34.0*mul), (3.0*mul, -34.0*mul)])
            self.arm1_c.set_color(1.0, 1.0, 1.0)
            arm1trans = rendering.Transform(translation=(108*mul, 187*mul), rotation = 15/180*np.pi)
            self.arm1_c.add_attr(arm1trans)
            self.viewer.add_geom(self.arm1_c)
            
            self.arm0 = rendering.FilledPolygon([(-5.0*mul,-36.0*mul), (-5.0*mul, 36.0*mul), (5.0*mul, 36.0*mul), (5.0*mul, -36.0*mul)])
            self.arm0.set_color(1.0, 1.0, 1.0)
            arm0trans = rendering.Transform(translation=(108*mul, 313*mul), rotation = -15/180*np.pi)
            self.arm0.add_attr(arm0trans)
            self.viewer.add_geom(self.arm0)

            self.arm0_c = rendering.FilledPolygon([(-3.0*mul,-34.0*mul), (-3.0*mul, 34.0*mul), (3.0*mul, 34.0*mul), (3.0*mul, -34.0*mul)])
            self.arm0_c.set_color(1.0, 1.0, 1.0)
            arm1trans = rendering.Transform(translation=(108*mul, 313*mul), rotation = -15/180*np.pi)
            self.arm0_c.add_attr(arm1trans)
            self.viewer.add_geom(self.arm0_c)

            #----------------------------draw Turtlebot_1
            turtlebot_1 = rendering.make_circle(radius=18.0*mul)
            turtlebot_1.set_color(*(0.15,0.65,0.15))
            self.turtlebot_1trans = rendering.Transform(translation=(self.agents[0].xcoord*100*mul, self.agents[0].ycoord*100*mul))
            turtlebot_1.add_attr(self.turtlebot_1trans)
            self.viewer.add_geom(turtlebot_1)

            turtlebot_1_c = rendering.make_circle(radius=16.0*mul)
            turtlebot_1_c.set_color(*(0.0,0.8,0.4))
            self.turtlebot_1trans_c = rendering.Transform(translation=(self.agents[0].xcoord*100*mul, self.agents[0].ycoord*100*mul))
            turtlebot_1_c.add_attr(self.turtlebot_1trans_c)
            self.viewer.add_geom(turtlebot_1_c)
            
            #----------------------------draw Turtlebot_2
            turtlebot_2 = rendering.make_circle(radius=18.0*mul)
            turtlebot_2.set_color(*(0.15,0.15,0.65))
            self.turtlebot_2trans = rendering.Transform(translation=(self.agents[1].xcoord*100, self.agents[1].ycoord*100*mul))
            turtlebot_2.add_attr(self.turtlebot_2trans)
            self.viewer.add_geom(turtlebot_2)

            turtlebot_2_c = rendering.make_circle(radius=16.0*mul)
            turtlebot_2_c.set_color(*(0.0,0.4,0.8))
            self.turtlebot_2trans_c = rendering.Transform(translation=(self.agents[1].xcoord*100, self.agents[1].ycoord*100*mul))
            turtlebot_2_c.add_attr(self.turtlebot_2trans_c)
            self.viewer.add_geom(turtlebot_2_c)

            #----------------------------draw human_0's status
            self.human0_progress_bar = []
            total_steps = self.humans[0].task_total_steps
            for i in range(total_steps):
                progress_bar = rendering.FilledPolygon([(-10*mul,-10*mul), (-10*mul,10*mul), (10*mul,10*mul), (10*mul,-10*mul)])
                progress_bar.set_color(0.8, 0.8, 0.8)
                progress_bartrans = rendering.Transform(translation=(520*mul+i*26*mul,480*mul))
                progress_bar.add_attr(progress_bartrans)
                self.viewer.add_geom(progress_bar)
                self.human0_progress_bar.append(progress_bar)
            
            #----------------------------draw human_1's status
            self.human1_progress_bar = []
            total_steps = self.humans[1].task_total_steps
            for i in range(total_steps):
                progress_bar = rendering.FilledPolygon([(-10*mul,-10*mul), (-10*mul,10*mul), (10*mul,10*mul), (10*mul,-10*mul)])
                progress_bar.set_color(0.8, 0.8, 0.8)
                progress_bartrans = rendering.Transform(translation=(720*mul+i*26*mul,480*mul))
                progress_bar.add_attr(progress_bartrans)
                self.viewer.add_geom(progress_bar)
                self.human1_progress_bar.append(progress_bar)

            #----------------------------draw human_2's status
            self.human2_progress_bar = []
            total_steps = self.humans[2].task_total_steps
            for i in range(total_steps):
                progress_bar = rendering.FilledPolygon([(-10*mul,-10*mul), (-10*mul,10*mul), (10*mul,10*mul), (10*mul,-10*mul)])
                progress_bar.set_color(0.8, 0.8, 0.8)
                progress_bartrans = rendering.Transform(translation=(720*mul+i*26*mul,20*mul))
                progress_bar.add_attr(progress_bartrans)
                self.viewer.add_geom(progress_bar)
                self.human2_progress_bar.append(progress_bar)

        # draw each robot's status
        self.turtlebot_1trans.set_translation(self.agents[0].xcoord*100*mul, self.agents[0].ycoord*100*mul)
        self.turtlebot_1trans_c.set_translation(self.agents[0].xcoord*100*mul, self.agents[0].ycoord*100*mul)
        self.turtlebot_2trans.set_translation(self.agents[1].xcoord*100*mul, self.agents[1].ycoord*100*mul)
        self.turtlebot_2trans_c.set_translation(self.agents[1].xcoord*100*mul, self.agents[1].ycoord*100*mul)
        self.fetchtrans.set_translation(self.agents[2].xcoord*100*mul, self.agents[2].ycoord*100*mul)

        # # reset human's progress bar
        for idx, bar in enumerate(self.human0_progress_bar):
            bar.set_color(0.8,0.8,0.8)
        for idx, bar in enumerate(self.human1_progress_bar):
            bar.set_color(0.8,0.8,0.8)
        for idx, bar in enumerate(self.human2_progress_bar):
            bar.set_color(0.8,0.8,0.8)

        # draw each human's status
        if self.humans[0].cur_step_time_left > 0:
            for idx, bar in enumerate(self.human0_progress_bar):
                if idx < self.humans[0].cur_step:
                    bar.set_color(0.0,0.0,0.0)
                if idx == self.humans[0].cur_step:
                    bar.set_color(*self.human_bar_colors[0])
                    break
        else:
            for idx, bar in enumerate(self.human0_progress_bar):
                if idx <= self.humans[0].cur_step:
                    bar.set_color(0.0,0.0,0.0)
        
        # draw each human's status
        if self.humans[1].cur_step_time_left > 0:
            for idx, bar in enumerate(self.human1_progress_bar):
                if idx < self.humans[1].cur_step:
                    bar.set_color(0.0,0.0,0.0)
                if idx == self.humans[1].cur_step:
                    bar.set_color(*self.human_bar_colors[1])
                    break
        else:
            for idx, bar in enumerate(self.human1_progress_bar):
                if idx <= self.humans[1].cur_step:
                    bar.set_color(0.0,0.0,0.0)

        # draw each human's status
        if self.humans[2].cur_step_time_left > 0:
            for idx, bar in enumerate(self.human2_progress_bar):
                if idx < self.humans[2].cur_step:
                    bar.set_color(0.0,0.0,0.0)
                if idx == self.humans[2].cur_step:
                    bar.set_color(*self.human_bar_colors[2])
                    break
        else:
            for idx, bar in enumerate(self.human2_progress_bar):
                if idx <= self.humans[2].cur_step:
                    bar.set_color(0.0,0.0,0.0)
        
        # reset fetch arm
        self.arm0.set_color(1.0, 1.0, 1.0)
        self.arm0_c.set_color(1.0, 1.0, 1.0)
        self.arm1.set_color(1.0, 1.0, 1.0)
        self.arm1_c.set_color(1.0, 1.0, 1.0)

        self.arm2trans_c.set_translation(self.agents[2].xcoord*10000*mul+55*mul, self.agents[2].ycoord*100*mul)
        self.arm2trans.set_translation(self.agents[2].xcoord*10000*mul+55*mul, self.agents[2].ycoord*100*mul)


        self.pass_objs = 0

        if self.agents[2].cur_action is not None and \
                self.agents[2].cur_action.idx == 1 and \
                self.agents[2].cur_action_time_left <= 0.0 and \
                not self.agents[2].serving_failed and self.pass_objs < self.n_objs:
                    self.pass_objs += 1
                    self.arm0.set_color(0.0, 0.0, 0.0)
                    self.arm0_c.set_color(0.5,0.5,0.5)

        elif self.agents[2].cur_action is not None and \
                self.agents[2].cur_action.idx == 2 and \
                self.agents[2].cur_action_time_left <= 0.0 and \
                not self.agents[2].serving_failed and self.pass_objs < self.n_objs:
                    self.pass_objs += 1
                    self.arm1.set_color(0.0, 0.0, 0.0)
                    self.arm1_c.set_color(0.5, 0.5, 0.5)

        elif self.agents[2].cur_action is not None and \
                self.agents[2].cur_action.idx > 2 and \
                np.sum(self.agents[2].count_found_obj) < self.n_objs*self.n_each_obj:
                    self.arm2trans_c.set_translation(self.agents[2].xcoord*100*mul+55*mul, self.agents[2].ycoord*100*mul)
                    self.arm2trans.set_translation(self.agents[2].xcoord*100*mul+55*mul, self.agents[2].ycoord*100*mul)

        return self.viewer.render(return_rgb_array = mode=='rgb_array')


class ObjSearchDelivery_v0(ObjSearchDelivery):

    "Three rooms and two turtlebots, where one fast human and two slow human"

    metadata = {
            'render.modes': ['human', 'rgb_array'],
            'video.frames_per_second' : 50
            }

    def __init__(self, *args, **kwargs):

        super(ObjSearchDelivery_v0, self).__init__(*args, **kwargs)

        self.createHumans()
        self.create_turtlebot_actions()
        self.create_fetch_actions()
        self.createAgents()

        if self.human_speed[0] == self.human_speed[1] == self.human_speed[2]:
            self.human_bar_colors = [(0.0, 1.0, 0.0), (0.0, 1.0, 0.0), (0.0, 1.0, 0.0)]
        else:
            self.human_bar_colors = [(1.0, 0.5, 0.0), (0.0, 1.0, 0.0), (0.0, 1.0, 0.0)]

    def create_turtlebot_actions(self):

        self.action_space_T = spaces.Discrete(5)

        if not self.obs_human_wait:
            # Descrete location areas: 3 
            # human's working step
            # which object in the basket: n_objs
            # which turtlebot's object is ready: 2
            self.observation_space_T = spaces.MultiBinary(6+self.n_steps_human_task*self.n_human+self.n_objs+2)
        else:
            self.observation_space_T = spaces.MultiBinary(6+self.n_steps_human_task*self.n_human+self.n_objs+2+self.n_human)
        #-----------------def single step macro-actions for Turtlebot 
        T_MA0 = MacroAction('Go_WA0', 0, expected_t_cost = None, ma_bwpterm = 0)
        T_MA1 = MacroAction('Go_WA1', 1, expected_t_cost = None, ma_bwpterm = 1)
        T_MA2 = MacroAction('Go_WA2', 2, expected_t_cost = None, ma_bwpterm = 2)
        T_MA3 = MacroAction('Go_Tool_Room', 3, expected_t_cost = None, ma_bwpterm = 3)
        T_MA4 = MacroAction('Get_Tool', 4, expected_t_cost = None, ma_bwpterm = 4)

        self.T_MAs = [T_MA0, T_MA1, T_MA2, T_MA3, T_MA4]

    def create_fetch_actions(self):
        self.action_space_F = spaces.Discrete(3+self.n_objs)
        if not self.obs_human_wait:
            # which object is on the waiting spot
            # which turtlebot is beside the table: 2
            self.observation_space_F = spaces.MultiBinary(self.n_objs+2) 
        else:
            self.observation_space_F = spaces.MultiBinary(self.n_objs+2)
           
        #-----------------def single step macro-actions for Fetch Robot
        F_MA0 = MacroAction('Wait_Request', 0, expected_t_cost = 1)
        F_MA1 = MacroAction('Pass_Obj_T0', 1, expected_t_cost = self.fetch_pass_obj_tc)
        F_MA2 = MacroAction('Pass_Obj_T1', 2, expected_t_cost = self.fetch_pass_obj_tc)
        self.F_MAs = [F_MA0, F_MA1, F_MA2]
        for i in range(self.n_objs):
            F_MA = MacroAction('Look_For_obj'+str(i), i+3, expected_t_cost=self.fetch_look_for_obj_tc)
            self.F_MAs.append(F_MA)

    def createAgents(self):

        #-----------------initialize Two Turtlebot agents
        Turtlebot1 = AgentTurtlebot_v7(0, 
                                       3.0, 
                                       3.5, 
                                       self.BWPs_T0, 
                                       self.T_MAs, 
                                       self.n_objs, 
                                       speed=self.TB_move_speed, 
                                       move_noisy=self.TB_move_noisy, 
                                       move_cost=self.TB_move_cost, 
                                       get_tool_wait=self.fetch_pass_obj_tc+self.fetch_look_for_obj_tc, 
                                       delay_delivery_penalty=self.delay_delivery_penalty)

        Turtlebot2 = AgentTurtlebot_v7(1, 
                                       3.0, 
                                       1.5, 
                                       self.BWPs_T1, 
                                       self.T_MAs, 
                                       self.n_objs, 
                                       speed=self.TB_move_speed, 
                                       move_noisy=self.TB_move_noisy, 
                                       move_cost=self.TB_move_cost, 
                                       get_tool_wait=self.fetch_pass_obj_tc+self.fetch_look_for_obj_tc, 
                                       delay_delivery_penalty=self.delay_delivery_penalty)

        #-----------------initialize One Fetch Robot agent
        Fetch_robot = AgentFetch_v4(2, 
                                    0.9, 
                                    2.5, 
                                    self.F_MAs, 
                                    self.n_objs, 
                                    self.n_each_obj, 
                                    self.fetch_manip_noisy, 
                                    self.fetch_drop_obj_penalty)

        self.agents = [Turtlebot1, Turtlebot2, Fetch_robot]

    def step(self, actions):

        """
        Parameters
        ----------
        actions : int | List[..]
           The discrete macro-action index for one or more agents. 

        Returns
        -------
        observations : ndarry | List[..]
            A list of  each agent's macor-observation.
        rewards : float | List[..]
            A global shared reward for each agent.
        done : bool
            Whether the current episode is over or not.
        info: dict{}
            "mac_done": binary(1/0) | List[..]
                whether the current macro_action is done or not.
            "cur_mac": int | list[..]
                "The current macro-action's indices"
        """

        rewards = -1.0
        terminate = 0
        cur_actions= []
        cur_actions_done= []

        self.count_step += 1

        # Each Turtlebot executes one step
        for idx, turtlebot in enumerate(self.agents[0:2]):
            # when the previous macro-action has not been finished, and return the previous action id
            if not turtlebot.cur_action_done:
                reward = turtlebot.step(turtlebot.cur_action.idx, self.humans)
                cur_actions.append(turtlebot.cur_action.idx)
            else:
                reward = turtlebot.step(actions[idx], self.humans)
                cur_actions.append(actions[idx])
            rewards += reward

        # Fetch executes one step
        if not self.agents[2].cur_action_done:
            reward = self.agents[2].step(self.agents[2].cur_action.idx, self.agents)
            cur_actions.append(self.agents[2].cur_action.idx)
        else:
            reward = self.agents[2].step(actions[2], self.agents)
            cur_actions.append(actions[2])
        rewards += reward

        # collect the info about the cur_actions and if they are finished
        for idx, agent in enumerate(self.agents):
            cur_actions_done.append(1 if agent.cur_action_done else 0)

        # episode terminates condition
        for idx, human in enumerate(self.humans):
            if idx not in self.finish_serve_humans and \
               (human.cur_step == self.n_steps_human_task-2) and \
               human.next_requested_obj_obtained:
                self.finish_serve_humans.append(idx)

        # each human executes one step
        for idx, human in enumerate(self.humans):
            if idx in self.n_human_finished:
                continue
            human.cur_step_time_left -= 1.0

            if human.cur_step_time_left <= 0.0 and human.next_requested_obj_obtained:
                human.step()
            
            if human.whole_task_finished:
                self.n_human_finished.append(idx)

        if self.rendering:
            self.render()
            print(" ")
            print("Actions list:")
            print("Turtlebot0 \t action \t\t{}".format(self.agents[0].cur_action.name))
            print("           \t action_t_left \t\t{}".format(self.agents[0].cur_action_time_left))
            print("           \t action_done \t\t{}".format(self.agents[0].cur_action_done))
            print("Turtlebot1 \t action \t\t{}".format(self.agents[1].cur_action.name))
            print("           \t action_t_left \t\t{}".format(self.agents[1].cur_action_time_left))
            print("           \t action_done \t\t{}".format(self.agents[1].cur_action_done))
            print("Fetchrobot \t action \t\t{}".format(self.agents[2].cur_action.name))
            print("           \t action_t_left \t\t{}".format(self.agents[2].cur_action_time_left))
            print("           \t action_done \t\t{}".format(self.agents[2].cur_action_done))
            print("           \t is_serving \t\t{}".format(self.agents[2].serving))
            print("           \t serving_failed \t{}".format(self.agents[2].serving_failed))

        observations = self._getobs()

        # reset Turtlebot request.
        self.agents[0].request_objs = np.zeros(self.n_objs)
        self.agents[1].request_objs = np.zeros(self.n_objs)

        if self.rendering:
            print("")
            print("Humans status:")
            for idx, human in enumerate(self.humans):
                print("Human" + str(idx) + " \t\t cur_step  \t\t\t{}".format(human.cur_step))
                print("      " + " \t\t cur_step_t_left  \t\t{}".format(human.cur_step_time_left))
                print("      " + " \t\t next_request_obj  \t\t{}".format(human.next_request_obj_idx))
                print("      " + " \t\t requested_obj_obtain  \t\t{}".format(human.next_requested_obj_obtained))
                print("      " + " \t\t whole_task_finished  \t\t{}".format(human.whole_task_finished))
                print(" ")

        return observations, [rewards]*self.n_agent, len(self.finish_serve_humans) == 3, {'cur_mac': cur_actions, 'mac_done': cur_actions_done}

    def _getobs(self):

        #--------------------get observations at the beginning of each episode
        if self.t == 0:
            # get initial observation for turtlebot0
            T_obs_0 = np.zeros(self.observation_space_T.n)
            T_obs_0[len(self.BWPs_T0)] = 1.0

            # get initial observation for turtlebot1
            T_obs_1 = np.zeros(self.observation_space_T.n)
            T_obs_1[len(self.BWPs_T1)] = 1.0

            # get initial observaion for fetch robot
            F_obs = np.zeros(self.observation_space_F.n) 

            observations = [T_obs_0, T_obs_1, F_obs]
            self.t = 1
            self.old_observations = observations

            return observations

        #---------------------get observations for the two turtlebots
        if self.rendering:
            print("")
            print("observations list:")

        observations = []
        for idx, agent in enumerate(self.agents[0:2]):

            # won't get new obs until current macro-action finished
            if not agent.cur_action_done:
                observations.append(self.old_observations[idx])
                if self.rendering:
                    print("turtlebot" + str(idx) + " \t loc  \t\t\t{}".format(self.old_observations[idx][0:(len(self.BWPs_T0)+1)]))
                    print("          " + " \t hm0_cur_step \t\t{}".format(self.old_observations[idx][(len(self.BWPs_T0)+1):
                                                                          (len(self.BWPs_T0)+1)+self.n_steps_human_task]))
                    print("          " + " \t hm1_cur_step \t\t{}".format(self.old_observations[idx][(len(self.BWPs_T0)+1)+self.n_steps_human_task:
                                                                          (len(self.BWPs_T0)+1)+self.n_steps_human_task*2]))
                    print("          " + " \t hm2_cur_step \t\t{}".format(self.old_observations[idx][(len(self.BWPs_T0)+1)+self.n_steps_human_task*2:
                                                                          (len(self.BWPs_T0)+1)+self.n_steps_human_task*self.n_human]))
                    print("          " + " \t basket_objs \t\t{}".format(self.old_observations[idx][(len(self.BWPs_T0)+1)+self.n_steps_human_task*self.n_human:
                                                                          (len(self.BWPs_T0)+1)+self.n_steps_human_task*self.n_human+self.n_objs]))
                    if not self.obs_human_wait:
                        print("          " + " \t obj_ready \t\t{}".format(self.old_observations[idx][-2:]))
                    else:
                        print("          " + " \t obj_ready \t\t{}".format(self.old_observations[idx][-(self.n_human+2):-self.n_human]))
                        print("          " + " \t human_wait \t\t{}".format(self.old_observations[idx][-self.n_human:]))
                    print("")

                continue

            # get observation about location
            T_obs_0 = np.zeros(len(self.BWPs_T0)+1)
            if agent.cur_BWP is not None:
                T_obs_0[agent.cur_BWP.idx] = 1.0
            else:
                T_obs_0[-1] = 1.0
            BWP =agent.cur_BWP

            if self.rendering:
                print("Turtlebot" + str(idx) + " \t loc  \t\t\t{}".format(T_obs_0))

            # get observation about the human's current working step
            T_obs_1 = np.zeros(self.n_steps_human_task*self.n_human)
            if BWP is not None and BWP.idx < self.n_human:               #tweak depends on number of humans
                T_obs_1[self.humans[BWP.idx].cur_step + BWP.idx*self.n_steps_human_task] = 1.0

            if self.rendering:
                print("          " + " \t Hm0_cur_step \t\t{}".format(T_obs_1[0:self.n_steps_human_task]))
                print("          " + " \t Hm1_cur_step \t\t{}".format(T_obs_1[self.n_steps_human_task:self.n_steps_human_task*2]))
                print("          " + " \t Hm2_cur_step \t\t{}".format(T_obs_1[-self.n_steps_human_task:]))

            T_obs_3 = agent.objs_in_basket

            if self.rendering:
                print("          " + " \t Basket_objs \t\t{}".format(T_obs_3))

            # get observation about which turtlebot's tool is ready (This message only can be received in Tool Room)
            if BWP is None or BWP.idx >= len(self.BWPs_T0) - 2:
                T_obs_4 = self.agents[2].ready_objs
            else:
                T_obs_4 = np.zeros(2)

            if self.rendering:
                print("          " + " \t Obj_ready \t\t{}".format(T_obs_4))
                print("")

            # observe human waiting
            if self.obs_human_wait:
                T_obs_5 = np.zeros(self.n_human)
                if BWP is not None and BWP.idx < self.n_human:               #tweak depends on number of humans
                    if self.humans[BWP.idx].cur_step_time_left < 0.0:
                        T_obs_5[BWP.idx] = 1
                if self.rendering:
                    print("          " + " \t human_wait \t\t{}".format(T_obs_5))


            # collect obs to be an array with shape (self.observation_space_T.n, )
            if not self.obs_human_wait:
                T_obs = np.hstack((T_obs_0, T_obs_1, T_obs_3, T_obs_4))
            else:
                T_obs = np.hstack((T_obs_0, T_obs_1, T_obs_3, T_obs_4, T_obs_5))
            assert len(T_obs) == self.observation_space_T.n

            observations.append(T_obs)
            self.old_observations[idx] = T_obs

        #--------------------get observations for Fetch robot
        if not self.agents[2].cur_action_done:
            observations.append(self.old_observations[2])
            if self.rendering:
                print("Fetchrobot" + " \t which_obj_ready  \t{}".format(self.old_observations[2][0:3]))
                print("          " + " \t T#_beside_table  \t{}".format(self.old_observations[2][3:5]))
                # if self.obs_human_wait:
                #     print("          " + " \t human_wait \t\t{}".format(self.old_observations[2][-self.n_human:]))
                print(" ")
                print("          " + " \t Found_objs  \t{}".format(self.agents[2].found_objs))
        else:
            # get observation about which objects are ready
            F_obs_0 = np.zeros(self.n_objs)
            for obj_idx in self.agents[2].found_objs:
                F_obs_0[obj_idx] += 1
            
            if self.rendering:
                print("Fetchrobot" + " \t which_obj_ready  \t{}".format(F_obs_0))

            # get observation about which turtlebot is beside the table
            F_obs_1 = np.zeros(2)
            for idx, agent in enumerate(self.agents[0:2]):
                if agent.xcoord == agent.BWPs[-1].xcoord and agent.ycoord == agent.BWPs[-1].ycoord:
                    F_obs_1[idx] = 1.0
            
            if self.rendering:
                print("          " + " \t T#_beside_table  \t{}".format(F_obs_1))

            # get observation about human waiting status
            # if self.obs_human_wait:
            #     F_obs_2 = np.zeros(self.n_human)
            #     for idx, human in enumerate(self.humans):
            #         if human.cur_step_time_left < 0.0:
            #             F_obs_2[idx] = 1
            #     print("          " + " \t human_wait \t\t{}".format(F_obs_2))

            if self.rendering:
                print("          " + " \t Found_objs  \t{}".format(self.agents[2].found_objs))

            # collect obs to be an array with shape (self.observation_space_F.n, )
            if not self.obs_human_wait:
                F_obs = np.hstack((F_obs_0, F_obs_1))
            else:
                F_obs = np.hstack((F_obs_0, F_obs_1))

            assert len(F_obs) == self.observation_space_F.n
            self.old_observations[2] = F_obs
            observations.append(F_obs)

        return observations

    def get_state(self):

        state = []
        # each agent's position
        for ag in self.agents:
            state.append(ag.xcoord / 7.0)
            state.append(ag.ycoord / 5.0)

        # objects in basket
        state += self.agents[0].objs_in_basket.tolist()
        state += self.agents[1].objs_in_basket.tolist()

        # which obj is in the staging area
        objs = np.zeros(self.n_objs)
        for obj_idx in self.agents[2].found_objs:
            objs[obj_idx] += 1
        state += objs.tolist()

        # whether fetch is passing any object
        obj_inhand = np.zeros(self.n_objs)
        if self.agents[2].cur_action is not None:
            if self.agents[2].cur_action.idx in [1,2] and \
                    not self.agents[2].cur_action_done and \
                    len(self.agents[2].found_objs) > 0:
                        obj_inhand[self.agents[2].found_objs[0]] = 1.0
        assert obj_inhand.sum() <= 1, "More than one object in fetch's hand ..."
        state += obj_inhand.tolist()

        # fetch's action status
        if self.agents[2].cur_action is not None:
            state.append(self.agents[2].cur_action_time_left / self.agents[2].cur_action.t_cost)
        else:
            state.append(0.0)

        # human status
        for human in self.humans:
            human_status = np.zeros(self.n_steps_human_task)
            human_status[human.cur_step] = 1.0
            state += human_status.tolist()
            if human.cur_step_time_left >= 0.0:
                state.append(1 - human.cur_step_time_left / \
                        human.expected_timecost_per_task_step[human.cur_step])
            else:
                state.append(-1.0)

        if self.rendering:
            print(f"Turtlebot1 pos {state[0]*7.0, state[1]*5.0}")
            print(f"Turtlebot2 pos {state[2]*7.0, state[3]*5.0}")
            print(f"Fetch pos {state[4]*7.0, state[5]*5.0}")
            print(f"Objs in Turtlebot1 basket {state[6:9]}")
            print(f"Objs in Turtlebot2 basket {state[9:12]}")
            print(f"Objs in staging area {state[12:15]}")
            print(f"Obj in hand {state[15:18]}")
            print(f"Fetch action status {state[18]}")
            print(f"Human_0 status {state[19:23]}")
            print(f"Human_0 current process {state[23]}")
            print(f"Human_1 status {state[24:28]}")
            print(f"Human_1 current process {state[28]}")

        return np.array(state)


class ObjSearchDelivery_v1(ObjSearchDelivery):

    metadata = {
            'render.modes': ['human', 'rgb_array'],
            'video.frames_per_second' : 50
            }

    def __init__(self, *args, **kwargs):

        super(ObjSearchDelivery_v1, self).__init__(*args, **kwargs)

        self.n_agent = 4

        #-----------------def belief waypoints
        BWP0 = BeliefWayPoint('WorkArea0', 0, 6.0, 3.0)
        BWP1 = BeliefWayPoint('WorkArea1', 1, 8.0, 3.0)
        BWP2 = BeliefWayPoint('WorkArea2', 2, 8.0, 2.0)
        BWP3 = BeliefWayPoint('ToolRoomWait', 3, 3.0, 2.5)
        BWP4_T0 = BeliefWayPoint('ToolRoomTable', 4, 0.8, 3.7)
        BWP4_T1 = BeliefWayPoint('ToolRoomTable', 4, 1.2, 3.7)
        BWP4_T2 = BeliefWayPoint('ToolRoomTable', 4, 1.2, 1.3)

        self.BWPs = [BWP0, BWP1, BWP2, BWP3, BWP4_T0, BWP4_T1, BWP4_T2]
        self.BWPs_T0 = [BWP0, BWP1, BWP2, BWP3, BWP4_T0]
        self.BWPs_T1 = [BWP0, BWP1, BWP2, BWP3, BWP4_T1]
        self.BWPs_T2 = [BWP0, BWP1, BWP2, BWP3, BWP4_T2]

        self.createHumans()
        self.create_turtlebot_actions()
        self.create_fetch_actions()
        self.createAgents()

        if self.human_speed[0] == self.human_speed[1] == self.human_speed[2]:
            self.human_bar_colors = [(0.0, 1.0, 0.0), (0.0, 1.0, 0.0), (0.0, 1.0, 0.0)]
        else:
            self.human_bar_colors = [(0.0, 1.0, 0.0), (0.0, 1.0, 0.0), (1.0, 0.5, 0.0)]

    def create_turtlebot_actions(self):

        self.action_space_T = spaces.Discrete(5)

        if not self.obs_human_wait:
            # Descrete location areas: 3 
            # human's working step
            # which object in the basket: n_objs
            # which turtlebot's object is ready: 2
            self.observation_space_T = spaces.MultiBinary(6+self.n_steps_human_task*self.n_human+self.n_objs+2)
        else:
            self.observation_space_T = spaces.MultiBinary(6+self.n_steps_human_task*self.n_human+self.n_objs+2+self.n_human)
        #-----------------def single step macro-actions for Turtlebot 
        T_MA0 = MacroAction('Go_WA0', 0, expected_t_cost = None, ma_bwpterm = 0)
        T_MA1 = MacroAction('Go_WA1', 1, expected_t_cost = None, ma_bwpterm = 1)
        T_MA2 = MacroAction('Go_WA2', 2, expected_t_cost = None, ma_bwpterm = 2)
        T_MA3 = MacroAction('Go_Tool_Room', 3, expected_t_cost = None, ma_bwpterm = 3)
        T_MA4 = MacroAction('Get_Tool', 4, expected_t_cost = None, ma_bwpterm = 4)

        self.T_MAs = [T_MA0, T_MA1, T_MA2, T_MA3, T_MA4]

    def create_fetch_actions(self):
        self.action_space_F = spaces.Discrete(4+self.n_objs)
        if not self.obs_human_wait:
            # which object is on the waiting spot
            # which turtlebot is beside the table: 3
            self.observation_space_F = spaces.MultiBinary(self.n_objs+3) 
        else:
            self.observation_space_F = spaces.MultiBinary(self.n_objs+3)
           
        #-----------------def single step macro-actions for Fetch Robot
        F_MA0 = MacroAction('Wait_Request', 0, expected_t_cost = 1)
        F_MA1 = MacroAction('Pass_Obj_T0', 1, expected_t_cost = self.fetch_pass_obj_tc)
        F_MA2 = MacroAction('Pass_Obj_T1', 2, expected_t_cost = self.fetch_pass_obj_tc)
        F_MA3 = MacroAction('Pass_Obj_T2', 3, expected_t_cost = self.fetch_pass_obj_tc)
        self.F_MAs = [F_MA0, F_MA1, F_MA2, F_MA3]
        for i in range(self.n_objs):
            F_MA = MacroAction('Look_For_obj'+str(i), i+4, expected_t_cost=self.fetch_look_for_obj_tc)
            self.F_MAs.append(F_MA)

    def createAgents(self):

        #-----------------initialize Two Turtlebot agents
        Turtlebot1 = AgentTurtlebot_v7(0, 
                                       3.0, 
                                       4.0, 
                                       self.BWPs_T0, 
                                       self.T_MAs, 
                                       self.n_objs, 
                                       speed=self.TB_move_speed, 
                                       move_noisy=self.TB_move_noisy, 
                                       move_cost=self.TB_move_cost, 
                                       get_tool_wait=self.fetch_pass_obj_tc+self.fetch_look_for_obj_tc, 
                                       delay_delivery_penalty=self.delay_delivery_penalty)

        Turtlebot2 = AgentTurtlebot_v7(1, 
                                       3.0, 
                                       2.5, 
                                       self.BWPs_T1, 
                                       self.T_MAs, 
                                       self.n_objs, 
                                       speed=self.TB_move_speed, 
                                       move_noisy=self.TB_move_noisy, 
                                       move_cost=self.TB_move_cost, 
                                       get_tool_wait=self.fetch_pass_obj_tc+self.fetch_look_for_obj_tc, 
                                       delay_delivery_penalty=self.delay_delivery_penalty)

        Turtlebot3 = AgentTurtlebot_v7(2, 
                                       3.0, 
                                       1.0, 
                                       self.BWPs_T2, 
                                       self.T_MAs, 
                                       self.n_objs, 
                                       speed=self.TB_move_speed, 
                                       move_noisy=self.TB_move_noisy, 
                                       move_cost=self.TB_move_cost, 
                                       get_tool_wait=self.fetch_pass_obj_tc+self.fetch_look_for_obj_tc, 
                                       delay_delivery_penalty=self.delay_delivery_penalty)


        #-----------------initialize One Fetch Robot agent
        Fetch_robot = AgentFetch_v5(3, 
                                    0.9, 
                                    2.5, 
                                    self.F_MAs, 
                                    self.n_objs, 
                                    self.n_each_obj, 
                                    self.fetch_manip_noisy, 
                                    self.fetch_drop_obj_penalty)

        self.agents = [Turtlebot1, Turtlebot2, Turtlebot3, Fetch_robot]

    def step(self, actions):

        """
        Parameters
        ----------
        actions : int | List[..]
           The discrete macro-action index for one or more agents. 

        Returns
        -------
        observations : ndarry | List[..]
            A list of  each agent's macor-observation.
        rewards : float | List[..]
            A global shared reward for each agent.
        done : bool
            Whether the current episode is over or not.
        info: dict{}
            "mac_done": binary(1/0) | List[..]
                whether the current macro_action is done or not.
            "cur_mac": int | list[..]
                "The current macro-action's indices"
        """

        rewards = -1.0
        terminate = 0
        cur_actions= []
        cur_actions_done= []

        self.count_step += 1

        # Each Turtlebot executes one step
        for idx, turtlebot in enumerate(self.agents[0:3]):
            # when the previous macro-action has not been finished, and return the previous action id
            if not turtlebot.cur_action_done:
                reward = turtlebot.step(turtlebot.cur_action.idx, self.humans)
                cur_actions.append(turtlebot.cur_action.idx)
            else:
                reward = turtlebot.step(actions[idx], self.humans)
                cur_actions.append(actions[idx])
            rewards += reward

        # Fetch executes one step
        if not self.agents[3].cur_action_done:
            reward = self.agents[3].step(self.agents[3].cur_action.idx, self.agents)
            cur_actions.append(self.agents[3].cur_action.idx)
        else:
            reward = self.agents[3].step(actions[3], self.agents)
            cur_actions.append(actions[3])
        rewards += reward

        # collect the info about the cur_actions and if they are finished
        for idx, agent in enumerate(self.agents):
            cur_actions_done.append(1 if agent.cur_action_done else 0)

        # episode terminates condition
        for idx, human in enumerate(self.humans):
            if idx not in self.finish_serve_humans and \
               (human.cur_step == self.n_steps_human_task-2) and \
               human.next_requested_obj_obtained:
                self.finish_serve_humans.append(idx)

        # each human executes one step
        for idx, human in enumerate(self.humans):
            if idx in self.n_human_finished:
                continue
            human.cur_step_time_left -= 1.0

            if human.cur_step_time_left <= 0.0 and human.next_requested_obj_obtained:
                human.step()
            
            if human.whole_task_finished:
                self.n_human_finished.append(idx)

        if self.rendering:
            self.render()
            print(" ")
            print("Actions list:")
            print("Turtlebot0 \t action \t\t{}".format(self.agents[0].cur_action.name))
            print("           \t action_t_left \t\t{}".format(self.agents[0].cur_action_time_left))
            print("           \t action_done \t\t{}".format(self.agents[0].cur_action_done))
            print("Turtlebot1 \t action \t\t{}".format(self.agents[1].cur_action.name))
            print("           \t action_t_left \t\t{}".format(self.agents[1].cur_action_time_left))
            print("           \t action_done \t\t{}".format(self.agents[1].cur_action_done))
            print("Turtlebot2 \t action \t\t{}".format(self.agents[2].cur_action.name))
            print("           \t action_t_left \t\t{}".format(self.agents[2].cur_action_time_left))
            print("           \t action_done \t\t{}".format(self.agents[2].cur_action_done))
            print("Fetchrobot \t action \t\t{}".format(self.agents[3].cur_action.name))
            print("           \t action_t_left \t\t{}".format(self.agents[3].cur_action_time_left))
            print("           \t action_done \t\t{}".format(self.agents[3].cur_action_done))
            print("           \t is_serving \t\t{}".format(self.agents[3].serving))
            print("           \t serving_failed \t{}".format(self.agents[3].serving_failed))

        observations = self._getobs()

        # reset Turtlebot request.
        self.agents[0].request_objs = np.zeros(self.n_objs)
        self.agents[1].request_objs = np.zeros(self.n_objs)
        self.agents[2].request_objs = np.zeros(self.n_objs)

        if self.rendering:
            print("")
            print("Humans status:")
            for idx, human in enumerate(self.humans):
                print("Human" + str(idx) + " \t\t cur_step  \t\t\t{}".format(human.cur_step))
                print("      " + " \t\t cur_step_t_left  \t\t{}".format(human.cur_step_time_left))
                print("      " + " \t\t next_request_obj  \t\t{}".format(human.next_request_obj_idx))
                print("      " + " \t\t requested_obj_obtain  \t\t{}".format(human.next_requested_obj_obtained))
                print("      " + " \t\t whole_task_finished  \t\t{}".format(human.whole_task_finished))
                print(" ")

        return observations, [rewards]*self.n_agent, len(self.finish_serve_humans) == 3, {'cur_mac': cur_actions, 'mac_done': cur_actions_done}

    def _getobs(self):

        #--------------------get observations at the beginning of each episode
        if self.t == 0:
            # get initial observation for turtlebot0
            T_obs_0 = np.zeros(self.observation_space_T.n)
            T_obs_0[len(self.BWPs_T0)] = 1.0

            # get initial observation for turtlebot1
            T_obs_1 = np.zeros(self.observation_space_T.n)
            T_obs_1[len(self.BWPs_T1)] = 1.0

            # get initial observation for turtlebot2
            T_obs_2 = np.zeros(self.observation_space_T.n)
            T_obs_2[len(self.BWPs_T1)] = 1.0

            # get initial observaion for fetch robot
            F_obs = np.zeros(self.observation_space_F.n) 

            observations = [T_obs_0, T_obs_1, T_obs_2, F_obs]
            self.t = 1
            self.old_observations = observations

            return observations

        #---------------------get observations for the two turtlebots
        if self.rendering:
            print("")
            print("observations list:")

        observations = []
        for idx, agent in enumerate(self.agents[0:3]):

            # won't get new obs until current macro-action finished
            if not agent.cur_action_done:
                observations.append(self.old_observations[idx])
                if self.rendering:
                    print("turtlebot" + str(idx) + " \t loc  \t\t\t{}".format(self.old_observations[idx][0:(len(self.BWPs_T0)+1)]))
                    print("          " + " \t hm0_cur_step \t\t{}".format(self.old_observations[idx][(len(self.BWPs_T0)+1):
                                                                          (len(self.BWPs_T0)+1)+self.n_steps_human_task]))
                    print("          " + " \t hm1_cur_step \t\t{}".format(self.old_observations[idx][(len(self.BWPs_T0)+1)+self.n_steps_human_task:
                                                                          (len(self.BWPs_T0)+1)+self.n_steps_human_task*2]))
                    print("          " + " \t hm2_cur_step \t\t{}".format(self.old_observations[idx][(len(self.BWPs_T0)+1)+self.n_steps_human_task*2:
                                                                          (len(self.BWPs_T0)+1)+self.n_steps_human_task*self.n_human]))
                    print("          " + " \t basket_objs \t\t{}".format(self.old_observations[idx][(len(self.BWPs_T0)+1)+self.n_steps_human_task*self.n_human:
                                                                          (len(self.BWPs_T0)+1)+self.n_steps_human_task*self.n_human+self.n_objs]))
                    if not self.obs_human_wait:
                        print("          " + " \t obj_ready \t\t{}".format(self.old_observations[idx][-2:]))
                    else:
                        print("          " + " \t obj_ready \t\t{}".format(self.old_observations[idx][-(self.n_human+2):-self.n_human]))
                        print("          " + " \t human_wait \t\t{}".format(self.old_observations[idx][-self.n_human:]))
                    print("")

                continue

            # get observation about location
            T_obs_0 = np.zeros(len(self.BWPs_T0)+1)
            if agent.cur_BWP is not None:
                T_obs_0[agent.cur_BWP.idx] = 1.0
            else:
                T_obs_0[-1] = 1.0
            BWP =agent.cur_BWP

            if self.rendering:
                print("Turtlebot" + str(idx) + " \t loc  \t\t\t{}".format(T_obs_0))

            # get observation about the human's current working step
            T_obs_1 = np.zeros(self.n_steps_human_task*self.n_human)
            if BWP is not None and BWP.idx < self.n_human:               #tweak depends on number of humans
                T_obs_1[self.humans[BWP.idx].cur_step + BWP.idx*self.n_steps_human_task] = 1.0

            if self.rendering:
                print("          " + " \t Hm0_cur_step \t\t{}".format(T_obs_1[0:self.n_steps_human_task]))
                print("          " + " \t Hm1_cur_step \t\t{}".format(T_obs_1[self.n_steps_human_task:self.n_steps_human_task*2]))
                print("          " + " \t Hm2_cur_step \t\t{}".format(T_obs_1[-self.n_steps_human_task:]))

            T_obs_3 = agent.objs_in_basket

            if self.rendering:
                print("          " + " \t Basket_objs \t\t{}".format(T_obs_3))

            # get observation about which turtlebot's tool is ready (This message only can be received in Tool Room)
            if BWP is None or BWP.idx >= len(self.BWPs_T0) - 2:
                T_obs_4 = self.agents[3].ready_objs
            else:
                T_obs_4 = np.zeros(2)

            if self.rendering:
                print("          " + " \t Obj_ready \t\t{}".format(T_obs_4))
                print("")

            # observe human waiting
            if self.obs_human_wait:
                T_obs_5 = np.zeros(self.n_human)
                if BWP is not None and BWP.idx < self.n_human:               #tweak depends on number of humans
                    if self.humans[BWP.idx].cur_step_time_left < 0.0:
                        T_obs_5[BWP.idx] = 1
                if self.rendering:
                    print("          " + " \t human_wait \t\t{}".format(T_obs_5))


            # collect obs to be an array with shape (self.observation_space_T.n, )
            if not self.obs_human_wait:
                T_obs = np.hstack((T_obs_0, T_obs_1, T_obs_3, T_obs_4))
            else:
                T_obs = np.hstack((T_obs_0, T_obs_1, T_obs_3, T_obs_4, T_obs_5))
            assert len(T_obs) == self.observation_space_T.n

            observations.append(T_obs)
            self.old_observations[idx] = T_obs

        #--------------------get observations for Fetch robot
        if not self.agents[3].cur_action_done:
            observations.append(self.old_observations[3])
            if self.rendering:
                print("Fetchrobot" + " \t which_obj_ready  \t{}".format(self.old_observations[3][0:3]))
                print("          " + " \t T#_beside_table  \t{}".format(self.old_observations[3][3:5]))
                # if self.obs_human_wait:
                #     print("          " + " \t human_wait \t\t{}".format(self.old_observations[3][-self.n_human:]))
                print(" ")
                print("          " + " \t Found_objs  \t{}".format(self.agents[3].found_objs))
        else:
            # get observation about which objects are ready
            F_obs_0 = np.zeros(self.n_objs)
            for obj_idx in self.agents[3].found_objs:
                F_obs_0[obj_idx] += 1
            
            if self.rendering:
                print("Fetchrobot" + " \t which_obj_ready  \t{}".format(F_obs_0))

            # get observation about which turtlebot is beside the table
            F_obs_1 = np.zeros(3)
            for idx, agent in enumerate(self.agents[0:3]):
                if agent.xcoord == agent.BWPs[-1].xcoord and agent.ycoord == agent.BWPs[-1].ycoord:
                    F_obs_1[idx] = 1.0
            
            if self.rendering:
                print("          " + " \t T#_beside_table  \t{}".format(F_obs_1))

            # get observation about human waiting status
            # if self.obs_human_wait:
            #     F_obs_2 = np.zeros(self.n_human)
            #     for idx, human in enumerate(self.humans):
            #         if human.cur_step_time_left < 0.0:
            #             F_obs_2[idx] = 1
            #     print("          " + " \t human_wait \t\t{}".format(F_obs_2))

            if self.rendering:
                print("          " + " \t Found_objs  \t{}".format(self.agents[3].found_objs))

            # collect obs to be an array with shape (self.observation_space_F.n, )
            if not self.obs_human_wait:
                F_obs = np.hstack((F_obs_0, F_obs_1))
            else:
                F_obs = np.hstack((F_obs_0, F_obs_1))

            assert len(F_obs) == self.observation_space_F.n
            self.old_observations[3] = F_obs
            observations.append(F_obs)

        return observations

    def render(self, mode='human'):

        mul = 2
        screen_width = 900 * mul
        screen_height = 500 * mul

        if self.viewer is None:
            from macro_marl.my_env import rendering
            self.viewer = rendering.Viewer(screen_width, screen_height)

            line = rendering.Line((0.0, 0.0), (0.0, screen_height))
            line.linewidth.stroke = 60
            line.set_color(0.0, 0.0, 0.0)
            self.viewer.add_geom(line)

            line = rendering.Line((0.0, 0.0), (screen_width, 0.0))
            line.linewidth.stroke = 60
            line.set_color(0.0, 0.0, 0.0)
            self.viewer.add_geom(line)

            line = rendering.Line((screen_width, 0.0), (screen_width, screen_height))
            line.linewidth.stroke = 60
            line.set_color(0.0, 0.0, 0.0)
            self.viewer.add_geom(line)

            line = rendering.Line((0.0, screen_height), (screen_width, screen_height))
            line.linewidth.stroke = 60
            line.set_color(0.0, 0.0, 0.0)
            self.viewer.add_geom(line)

            #--------------------------------draw rooms' boundaries

            for i in range(0,100,2):
                line_tool_room = rendering.Line((400*mul, i*5*mul), (400*mul, (i+1)*5*mul))
                line_tool_room.set_color(0,0,0)
                line_tool_room.linewidth.stroke = 2
                self.viewer.add_geom(line_tool_room)

            for i in range(0,80,2):
                line_WA = rendering.Line((700*mul+i*5*mul, 300*mul), (700*mul+(i+1)*5*mul, 300*mul))
                line_WA.linewidth.stroke = 2
                line_WA.set_color(0,0,0)
                self.viewer.add_geom(line_WA)

            for i in range(0,80,2):
                line_WA = rendering.Line((700*mul, 300*mul+i*5*mul), (700*mul, 300*mul+(i+1)*5*mul))
                line_WA.linewidth.stroke = 2
                line_WA.set_color(0,0,0)
                self.viewer.add_geom(line_WA)
                
            for i in range(0,40,2):
                line_WA = rendering.Line((500*mul+i*5*mul, 300*mul), (500*mul+(i+1)*5*mul, 300*mul))
                line_WA.linewidth.stroke = 2
                line_WA.set_color(0,0,0)
                self.viewer.add_geom(line_WA)

            for i in range(0,40,2):
                line_WA = rendering.Line((500*mul, 300*mul+i*5*mul), (500*mul, 300*mul+(i+1)*5*mul))
                line_WA.linewidth.stroke = 2
                line_WA.set_color(0,0,0)
                self.viewer.add_geom(line_WA)

            for i in range(0,40,2):
                line_WA = rendering.Line((700*mul+i*5*mul, 200*mul), (700*mul+(i+1)*5*mul, 200*mul))
                line_WA.linewidth.stroke = 2
                line_WA.set_color(0,0,0)
                self.viewer.add_geom(line_WA)

            for i in range(0,40,2):
                line_WA = rendering.Line((700*mul, 0+i*5*mul), (700*mul, 0+(i+1)*5*mul))
                line_WA.linewidth.stroke = 2
                line_WA.set_color(0,0,0)
                self.viewer.add_geom(line_WA)
 
            
            #---------------------------draw BW0
            for i in range(len(self.BWPs)):
                BWP = rendering.make_circle(radius=6*mul)
                BWP.set_color(178.0/255.0, 34.0/255.0, 34.0/255.0)
                BWPtrans = rendering.Transform(translation=(self.BWPs[i].xcoord*100*mul, self.BWPs[i].ycoord*100*mul))
                BWP.add_attr(BWPtrans)
                self.viewer.add_geom(BWP)

            #-------------------------------draw table
            tablewidth = 60.0*mul
            tableheight = 125.0*mul
            l,r,t,b = -tablewidth/2.0, tablewidth/2.0, tableheight/2.0, -tableheight/2.0
            table = rendering.FilledPolygon([(l,b), (l,t), (r,t), (r,b)])
            table.set_color(0.43,0.28,0.02)
            tabletrans = rendering.Transform(translation=(175*mul, 250*mul))
            table.add_attr(tabletrans)
            self.viewer.add_geom(table)

            tablewidth = 54.0*mul
            tableheight = 119.0*mul
            l,r,t,b = -tablewidth/2.0, tablewidth/2.0, tableheight/2.0, -tableheight/2.0
            table = rendering.FilledPolygon([(l,b), (l,t), (r,t), (r,b)])
            table.set_color(0.67,0.43,0.02)
            tabletrans = rendering.Transform(translation=(175*mul, 250*mul))
            table.add_attr(tabletrans)
            self.viewer.add_geom(table)

            #-----------------------------draw Fetch
            fetch = rendering.make_circle(radius=30*mul)
            fetch.set_color(*(0.0,0.0,0.0))
            self.fetchtrans = rendering.Transform(translation=(self.agents[3].xcoord*100*mul, self.agents[3].ycoord*100*mul))
            fetch.add_attr(self.fetchtrans)
            self.viewer.add_geom(fetch)

            #-----------------------------draw Fetch
            fetch_c = rendering.make_circle(radius=27*mul)
            fetch_c.set_color(*(0.5, 0.5,0.5))
            self.fetchtrans_c = rendering.Transform(translation=(self.agents[3].xcoord*100*mul, self.agents[3].ycoord*100*mul))
            fetch_c.add_attr(self.fetchtrans_c)
            self.viewer.add_geom(fetch_c)

            #-----------------------------draw Fetch arms
            self.arm3 = rendering.FilledPolygon([(-5.0*mul,-24.0*mul), (-5.0*mul, 24.0*mul), (5.0*mul, 24.0*mul), (5.0*mul, -24.0*mul)])
            self.arm3.set_color(0.0, 0.0, 0.0)
            self.arm3trans = rendering.Transform(translation=(self.agents[3].xcoord*10000*mul+55*mul, self.agents[3].ycoord*100*mul), rotation = -90/180*np.pi)
            self.arm3.add_attr(self.arm3trans)
            self.viewer.add_geom(self.arm3)

            self.arm3_c = rendering.FilledPolygon([(-3.0*mul,-22.0*mul), (-3.0*mul, 22.0*mul), (3.0*mul, 22.0*mul), (3.0*mul, -22.0*mul)])
            self.arm3_c.set_color(0.5, 0.5, 0.5)
            self.arm3trans_c = rendering.Transform(translation=(self.agents[3].xcoord*10000*mul+55*mul, self.agents[3].ycoord*100*mul), rotation = -90/180*np.pi)
            self.arm3_c.add_attr(self.arm3trans_c)
            self.viewer.add_geom(self.arm3_c)

            self.arm2 = rendering.FilledPolygon([(-5.0*mul,-36.0*mul), (-5.0*mul, 36.0*mul), (5.0*mul, 36.0*mul), (5.0*mul, -36.0*mul)])
            self.arm2.set_color(1.0, 1.0, 1.0)
            arm2trans = rendering.Transform(translation=(108*mul, 187*mul), rotation = 15/180*np.pi)
            self.arm2.add_attr(arm2trans)
            self.viewer.add_geom(self.arm2)

            self.arm2_c = rendering.FilledPolygon([(-3.0*mul,-34.0*mul), (-3.0*mul, 34.0*mul), (3.0*mul, 34.0*mul), (3.0*mul, -34.0*mul)])
            self.arm2_c.set_color(1.0, 1.0, 1.0)
            arm2trans = rendering.Transform(translation=(108*mul, 187*mul), rotation = 15/180*np.pi)
            self.arm2_c.add_attr(arm2trans)
            self.viewer.add_geom(self.arm2_c)

            self.arm1 = rendering.FilledPolygon([(-5.0*mul,-36.0*mul), (-5.0*mul, 36.0*mul), (5.0*mul, 36.0*mul), (5.0*mul, -36.0*mul)])
            self.arm1.set_color(1.0, 1.0, 1.0)
            arm1trans = rendering.Transform(translation=(108*mul, 313*mul), rotation = -15/180*np.pi)
            self.arm1.add_attr(arm1trans)
            self.viewer.add_geom(self.arm1)

            self.arm1_c = rendering.FilledPolygon([(-3.0*mul,-34.0*mul), (-3.0*mul, 34.0*mul), (3.0*mul, 34.0*mul), (3.0*mul, -34.0*mul)])
            self.arm1_c.set_color(1.0, 1.0, 1.0)
            arm1trans = rendering.Transform(translation=(108*mul, 313*mul), rotation = -15/180*np.pi)
            self.arm1_c.add_attr(arm1trans)
            self.viewer.add_geom(self.arm1_c)

            self.arm0 = rendering.FilledPolygon([(-5.0*mul,-34.0*mul), (-5.0*mul, 34.0*mul), (5.0*mul, 34.0*mul), (5.0*mul, -34.0*mul)])
            self.arm0.set_color(1.0, 1.0, 1.0)
            arm0trans = rendering.Transform(translation=(82*mul, 313*mul), rotation = 5/180*np.pi)
            self.arm0.add_attr(arm0trans)
            self.viewer.add_geom(self.arm0)

            self.arm0_c = rendering.FilledPolygon([(-3.0*mul,-32.0*mul), (-3.0*mul, 32.0*mul), (3.0*mul, 32.0*mul), (3.0*mul, -32.0*mul)])
            self.arm0_c.set_color(1.0, 1.0, 1.0)
            arm0trans = rendering.Transform(translation=(82*mul, 313*mul), rotation = 5/180*np.pi)
            self.arm0_c.add_attr(arm0trans)
            self.viewer.add_geom(self.arm0_c)

            #----------------------------draw Turtlebot_1
            turtlebot_1 = rendering.make_circle(radius=18.0*mul)
            turtlebot_1.set_color(*(0.15,0.65,0.15))
            self.turtlebot_1trans = rendering.Transform(translation=(self.agents[0].xcoord*100*mul, self.agents[0].ycoord*100*mul))
            turtlebot_1.add_attr(self.turtlebot_1trans)
            self.viewer.add_geom(turtlebot_1)

            turtlebot_1_c = rendering.make_circle(radius=16.0*mul)
            turtlebot_1_c.set_color(*(0.0,0.8,0.4))
            self.turtlebot_1trans_c = rendering.Transform(translation=(self.agents[0].xcoord*100*mul, self.agents[0].ycoord*100*mul))
            turtlebot_1_c.add_attr(self.turtlebot_1trans_c)
            self.viewer.add_geom(turtlebot_1_c)
            
            #----------------------------draw Turtlebot_2
            turtlebot_2 = rendering.make_circle(radius=18.0*mul)
            turtlebot_2.set_color(*(0.15,0.15,0.65))
            self.turtlebot_2trans = rendering.Transform(translation=(self.agents[1].xcoord*100*mul, self.agents[1].ycoord*100*mul))
            turtlebot_2.add_attr(self.turtlebot_2trans)
            self.viewer.add_geom(turtlebot_2)

            turtlebot_2_c = rendering.make_circle(radius=16.0*mul)
            turtlebot_2_c.set_color(*(0.0,0.4,0.8))
            self.turtlebot_2trans_c = rendering.Transform(translation=(self.agents[1].xcoord*100*mul, self.agents[1].ycoord*100*mul))
            turtlebot_2_c.add_attr(self.turtlebot_2trans_c)
            self.viewer.add_geom(turtlebot_2_c)

            #----------------------------draw Turtlebot_3
            turtlebot_3 = rendering.make_circle(radius=18.0*mul)
            turtlebot_3.set_color(*(0.6,0.6,0.0))
            self.turtlebot_3trans = rendering.Transform(translation=(self.agents[2].xcoord*100*mul, self.agents[2].ycoord*100*mul))
            turtlebot_3.add_attr(self.turtlebot_3trans)
            self.viewer.add_geom(turtlebot_3)

            turtlebot_3_c = rendering.make_circle(radius=16.0*mul)
            turtlebot_3_c.set_color(*(0.9,0.9,0.0))
            self.turtlebot_3trans_c = rendering.Transform(translation=(self.agents[2].xcoord*100*mul, self.agents[2].ycoord*100*mul))
            turtlebot_3_c.add_attr(self.turtlebot_3trans_c)
            self.viewer.add_geom(turtlebot_3_c)


            #----------------------------draw human_0's status
            self.human0_progress_bar = []
            total_steps = self.humans[0].task_total_steps
            for i in range(total_steps):
                progress_bar = rendering.FilledPolygon([(-10*mul,-10*mul), (-10*mul,10*mul), (10*mul,10*mul), (10*mul,-10*mul)])
                progress_bar.set_color(0.8, 0.8, 0.8)
                progress_bartrans = rendering.Transform(translation=(520*mul+i*26*mul,480*mul))
                progress_bar.add_attr(progress_bartrans)
                self.viewer.add_geom(progress_bar)
                self.human0_progress_bar.append(progress_bar)
            
            #----------------------------draw human_1's status
            self.human1_progress_bar = []
            total_steps = self.humans[1].task_total_steps
            for i in range(total_steps):
                progress_bar = rendering.FilledPolygon([(-10*mul,-10*mul), (-10*mul,10*mul), (10*mul,10*mul), (10*mul,-10*mul)])
                progress_bar.set_color(0.8, 0.8, 0.8)
                progress_bartrans = rendering.Transform(translation=(720*mul+i*26*mul,480*mul))
                progress_bar.add_attr(progress_bartrans)
                self.viewer.add_geom(progress_bar)
                self.human1_progress_bar.append(progress_bar)

            #----------------------------draw human_2's status
            self.human2_progress_bar = []
            total_steps = self.humans[2].task_total_steps
            for i in range(total_steps):
                progress_bar = rendering.FilledPolygon([(-10*mul,-10*mul), (-10*mul,10*mul), (10*mul,10*mul), (10*mul,-10*mul)])
                progress_bar.set_color(0.8, 0.8, 0.8)
                progress_bartrans = rendering.Transform(translation=(720*mul+i*26*mul,20*mul))
                progress_bar.add_attr(progress_bartrans)
                self.viewer.add_geom(progress_bar)
                self.human2_progress_bar.append(progress_bar)

        # draw each robot's status
        self.turtlebot_1trans.set_translation(self.agents[0].xcoord*100*mul, self.agents[0].ycoord*100*mul)
        self.turtlebot_1trans_c.set_translation(self.agents[0].xcoord*100*mul, self.agents[0].ycoord*100*mul)
        self.turtlebot_2trans.set_translation(self.agents[1].xcoord*100*mul, self.agents[1].ycoord*100*mul)
        self.turtlebot_2trans_c.set_translation(self.agents[1].xcoord*100*mul, self.agents[1].ycoord*100*mul)
        self.turtlebot_3trans.set_translation(self.agents[2].xcoord*100*mul, self.agents[2].ycoord*100*mul)
        self.turtlebot_3trans_c.set_translation(self.agents[2].xcoord*100*mul, self.agents[2].ycoord*100*mul)
        self.fetchtrans.set_translation(self.agents[3].xcoord*100*mul, self.agents[3].ycoord*100*mul)

        # # reset human's progress bar
        for idx, bar in enumerate(self.human0_progress_bar):
            bar.set_color(0.8,0.8,0.8)
        for idx, bar in enumerate(self.human1_progress_bar):
            bar.set_color(0.8,0.8,0.8)
        for idx, bar in enumerate(self.human2_progress_bar):
            bar.set_color(0.8,0.8,0.8)

        # draw each human's status
        if self.humans[0].cur_step_time_left > 0:
            for idx, bar in enumerate(self.human0_progress_bar):
                if idx < self.humans[0].cur_step:
                    bar.set_color(0.0,0.0,0.0)
                if idx == self.humans[0].cur_step:
                    bar.set_color(*self.human_bar_colors[0])
                    break
        else:
            for idx, bar in enumerate(self.human0_progress_bar):
                if idx <= self.humans[0].cur_step:
                    bar.set_color(0.0,0.0,0.0)
        
        # draw each human's status
        if self.humans[1].cur_step_time_left > 0:
            for idx, bar in enumerate(self.human1_progress_bar):
                if idx < self.humans[1].cur_step:
                    bar.set_color(0.0,0.0,0.0)
                if idx == self.humans[1].cur_step:
                    bar.set_color(*self.human_bar_colors[1])
                    break
        else:
            for idx, bar in enumerate(self.human1_progress_bar):
                if idx <= self.humans[1].cur_step:
                    bar.set_color(0.0,0.0,0.0)

        # draw each human's status
        if self.humans[2].cur_step_time_left > 0:
            for idx, bar in enumerate(self.human2_progress_bar):
                if idx < self.humans[2].cur_step:
                    bar.set_color(0.0,0.0,0.0)
                if idx == self.humans[2].cur_step:
                    bar.set_color(*self.human_bar_colors[2])
                    break
        else:
            for idx, bar in enumerate(self.human2_progress_bar):
                if idx <= self.humans[2].cur_step:
                    bar.set_color(0.0,0.0,0.0)
        
        # reset fetch arm
        self.arm0.set_color(1.0, 1.0, 1.0)
        self.arm0_c.set_color(1.0, 1.0, 1.0)
        self.arm1.set_color(1.0, 1.0, 1.0)
        self.arm1_c.set_color(1.0, 1.0, 1.0)
        self.arm2.set_color(1.0, 1.0, 1.0)
        self.arm2_c.set_color(1.0, 1.0, 1.0)

        self.arm3trans_c.set_translation(self.agents[3].xcoord*10000*mul+55*mul, self.agents[3].ycoord*100*mul)
        self.arm3trans.set_translation(self.agents[3].xcoord*10000*mul+55*mul, self.agents[3].ycoord*100*mul)


        self.pass_objs = 0

        if self.agents[3].cur_action is not None and \
                self.agents[3].cur_action.idx == 1 and \
                self.agents[3].cur_action_time_left <= 0.0 and \
                not self.agents[3].serving_failed and self.pass_objs < self.n_objs:
                    self.pass_objs += 1
                    self.arm0.set_color(0.0, 0.0, 0.0)
                    self.arm0_c.set_color(0.5,0.5,0.5)
        elif self.agents[3].cur_action is not None and \
                self.agents[3].cur_action.idx == 2 and \
                self.agents[3].cur_action_time_left <= 0.0 and \
                not self.agents[3].serving_failed and self.pass_objs < self.n_objs:
                    self.pass_objs += 1
                    self.arm1.set_color(0.0, 0.0, 0.0)
                    self.arm1_c.set_color(0.5, 0.5, 0.5)
        elif self.agents[3].cur_action is not None and \
                self.agents[3].cur_action.idx == 3 and \
                self.agents[3].cur_action_time_left <= 0.0 and \
                not self.agents[3].serving_failed and self.pass_objs < self.n_objs:
                    self.pass_objs += 1
                    self.arm2.set_color(0.0, 0.0, 0.0)
                    self.arm2_c.set_color(0.5, 0.5, 0.5)
        elif self.agents[3].cur_action is not None and \
                self.agents[3].cur_action.idx > 3 and \
                np.sum(self.agents[3].count_found_obj) < self.n_objs*self.n_each_obj:
                    self.arm3trans_c.set_translation(self.agents[3].xcoord*100*mul+55*mul, self.agents[3].ycoord*100*mul)
                    self.arm3trans.set_translation(self.agents[3].xcoord*100*mul+55*mul, self.agents[3].ycoord*100*mul)

        return self.viewer.render(return_rgb_array = mode=='rgb_array')
