# Supplementary material
Source: ML conference proceedings conference paper supplement (https://proceedings.neurips.cc/paper_files/paper/2022/hash/1c153788756d35559c22d105d1182c30-Abstract.html)
Supplement: Supplementary file 1 [file 1c153788756d35559c22d105d1182c30-Supplemental-Conference.zip › Supplementary Material/Code/src/macro_marl/my_env/overcooked/__init__.py]

from gym.envs.registration import register

register(
    id='Overcooked-v0',
    entry_point='macro_marl.my_env.overcooked.overcooked:Overcooked',
)

register(
    id='Overcooked-PO-v1',
    entry_point='macro_marl.my_env.overcooked.overcooked_PO_V1:POOvercooked_V1',
)

register(
    id='Overcooked-PO-MA-v1',
    entry_point='macro_marl.my_env.overcooked.overcooked_PO_MA_V1:POOvercooked_MA_V1',
)

register(
    id='Overcooked-mapBC-PO-MA-v1',
    entry_point='macro_marl.my_env.overcooked.overcooked_PO_MA_mapBC_V1:POOvercooked_MA_mapBC_V1',
)
