# Supplementary material
Source: ML conference proceedings conference paper supplement (https://proceedings.neurips.cc/paper_files/paper/2022/hash/1c153788756d35559c22d105d1182c30-Abstract.html)
Supplement: Supplementary file 1 [file 1c153788756d35559c22d105d1182c30-Supplemental-Conference.zip › Supplementary Material/Code/src/macro_marl/my_env/overcooked/mac_agent.py]

class MacAgent(object):
	def __init__(self):
		self.cur_macro_action = None
		self.cur_macro_action_done = True
		self.cur_chop_times = 0
		self.cur_macro_obs = None

	def reset(self):
		self.cur_macro_action = None
		self.cur_macro_action_done = True
		self.cur_chop_times = 0
		self.cur_macro_obs = None
	
	def get_low_level_action():
		raise

	def get_macro_action_done(self):
		raise
