# Supplementary material
Source: ML conference proceedings conference paper supplement (https://proceedings.neurips.cc/paper_files/paper/2022/hash/1c153788756d35559c22d105d1182c30-Abstract.html)
Supplement: Supplementary file 1 [file 1c153788756d35559c22d105d1182c30-Supplemental-Conference.zip › Supplementary Material/Code/src/macro_marl/my_env/overcooked/macActEnvWrapper.py]

from gym import Wrapper
class MacEnvWrapper(Wrapper):
    def __init__(self, env):
        super(MacEnvWrapper, self).__init__(env)

    @property
    def n_agent(self): 
        return self.env.n_agent

    @property
    def obs_size(self):
        return self.env.obs_size

    @property
    def n_action(self):
        return self.env.n_action

    @property
    def action_spaces(self):
        return self.env.action_spaces

    def reset(self): 
        return self.env.reset()

    def step(self, macro_actions):
    
        obs, reward, done, info = self.env.run(macro_actions)
          
        return obs, reward, done, info

    def action_space_sample(self):
        return self.env.macro_action_sample() 

    def get_avail_actions(self):
        return self.env.get_avail_actions()
