# Supplementary material
Source: ML conference proceedings conference paper supplement (https://proceedings.neurips.cc/paper_files/paper/2022/hash/1c153788756d35559c22d105d1182c30-Abstract.html)
Supplement: Supplementary file 1 [file 1c153788756d35559c22d105d1182c30-Supplemental-Conference.zip › Supplementary Material/Code/src/macro_marl/my_env/overcooked/overcooked.py]

import gym
import numpy as np
from .render.game import Game
from gym import spaces
from .items import Tomato, Lettuce, Plate, Knife, Delivery, Agent, Food

import copy

DIRECTION = [(0,1), (1,0), (0,-1), (-1,0)]
ITEMNAME = ["space", "counter", "agent", "tomato", "lettuce", "plate", "knife", "delivery"]
ITEMIDX= {"space": 0, "counter": 1, "agent": 2, "tomato": 3, "lettuce": 4, "plate": 5, "knife": 6, "delivery": 7}
AGENTCOLOR = ["blue", "magenta", "green", "yellow"]
TASKLIST = ["tomato salad", "lettuce salad", "tomato-lettuce salad"]


class Overcooked(gym.Env):
    metadata = {
        'render.modes': ['human', 'rgb_array'],
        'video.frames_per_second' : 50
        }

    def __init__(self, grid_dim, map, task, rewardList, debug = False):


        self.xlen, self.ylen = grid_dim
        if debug:
        	self.game = Game(self)
        self.initMap = map
        self.map = copy.deepcopy(self.initMap)
        self.task = task
        self.rewardList = rewardList
        self.debug = debug

        self.oneHotTask = []
        for t in TASKLIST:
            if t == self.task:
                self.oneHotTask.append(1)
            else:
                self.oneHotTask.append(0)

        self._createItems()
        self.n_agent = len(self.agent)

        #action: move(up, down, left, right), stay
        self.action_space = spaces.Discrete(5)

        #Observation: agent(pos[x,y]) dim = 2
        #    knife(pos[x,y]) dim = 2
        #    delivery (pos[x,y]) dim = 2
        #    plate(pos[x,y]) dim = 2
        #    food(pos[x,y]/status) dim = 3
        self.observation_space = spaces.Box(low=0, high=1, shape=(len(self._getObs()[0]),), dtype=np.float32)

    def _createItems(self):
        self.agent = []
        self.knife = []
        self.delivery = []
        self.tomato = []
        self.lettuce = []
        self.plate = []
        self.itemList = []
        agent_idx = 0
        for x in range(self.xlen):
            for y in range(self.ylen):
                if self.map[x][y] == ITEMIDX["agent"]:
                    self.agent.append(Agent(x, y, color = AGENTCOLOR[agent_idx]))
                    agent_idx += 1
                elif self.map[x][y] == ITEMIDX["knife"]:
                    self.knife.append(Knife(x, y))
                elif self.map[x][y] == ITEMIDX["delivery"]:
                    self.delivery.append(Delivery(x, y))                    
                elif self.map[x][y] == ITEMIDX["tomato"]:
                    self.tomato.append(Tomato(x, y))
                elif self.map[x][y] == ITEMIDX["lettuce"]:
                    self.lettuce.append(Lettuce(x, y))
                elif self.map[x][y] == ITEMIDX["plate"]:
                    self.plate.append(Plate(x, y))
        
        self.itemDic = {"agent": self.agent, "tomato": self.tomato, "lettuce": self.lettuce, "plate": self.plate, "knife": self.knife, "delivery": self.delivery}
        for key in self.itemDic:
            self.itemList += self.itemDic[key]


    def _getObs(self):
        obs = []
        for item in self.itemList:
            obs.append(item.x / self.xlen)
            obs.append(item.y / self.ylen)
            if isinstance(item, Food):
                obs.append(item.cur_chopped_times / item.required_chopped_times)
        obs += self.oneHotTask 

        obs = [np.array(obs)] * self.n_agent
        return obs
    
    def _findItem(self, x, y, itemName):
        for item in self.itemDic[itemName]:
            if item.x == x and item.y == y:
                return item


    @property
    def obs_size(self):
        return [self.observation_space.shape[0]] * self.n_agent

    @property
    def n_action(self):
        return [a.n for a in self.action_spaces]

    @property
    def action_spaces(self):
        return [self.action_space] * self.n_agent

    def get_avail_actions(self):
        return [self.get_avail_agent_actions(i) for i in range(self.n_agent)]

    def get_avail_agent_actions(self, nth):
        return [1] * self.action_spaces[nth].n

    
    def action_space_sample(self, i):
        return np.random.randint(self.action_spaces[i].n)
    

    def reset(self):
        self.map = copy.deepcopy(self.initMap)
        self._createItems()
        return self._getObs()
    
    def step(self, action):
        reward = 0
        done = False
        info = {}
        info['cur_mac'] = action
        info['mac_done'] = [True] * self.n_agent

        all_action_done = False

        for agent in self.agent:
            agent.moved = False

        if self.debug:
            print("in overcooked primitive actions:", action)

        if action[0] < 4 and action[1] < 4:
            new_agent0_x = self.agent[0].x + DIRECTION[action[0]][0]
            new_agent0_y =  self.agent[0].y + DIRECTION[action[0]][1] 

            new_agent1_x =  self.agent[1].x + DIRECTION[action[1]][0]
            new_agent1_y =  self.agent[1].y + DIRECTION[action[1]][1]    

            if new_agent0_x == self.agent[1].x and new_agent0_y == self.agent[1].y\
            and new_agent1_x == self.agent[0].x and new_agent1_y == self.agent[0].y:
                self.agent[0].move(new_agent0_x, new_agent0_y)
                self.agent[1].move(new_agent1_x, new_agent1_y)
                if self.debug:
                    print("swap")
                return self._getObs(), [reward] * self.n_agent, done, info

        while not all_action_done:
            for idx, agent in enumerate(self.agent):
                agent_action = action[idx]
                agent.moved = True

                if agent_action < 4:
                    target_x = agent.x + DIRECTION[agent_action][0]
                    target_y = agent.y + DIRECTION[agent_action][1]
                    target_name = ITEMNAME[self.map[target_x][target_y]]

                    if target_name == "agent":
                        target_agent = self._findItem(target_x, target_y, target_name)
                        if not target_agent.moved:
                            agent.moved = False
                    elif  target_name == "space":
                        self.map[agent.x][agent.y] = ITEMIDX["space"]
                        agent.move(target_x, target_y)
                        self.map[target_x][target_y] = ITEMIDX["agent"]
                    #pickup and chop
                    elif not agent.holding:
                        if target_name == "tomato" or target_name == "lettuce" or target_name == "plate":
                            item = self._findItem(target_x, target_y, target_name)
                            agent.pickup(item)
                            self.map[target_x][target_y] = ITEMIDX["counter"]
                        elif target_name == "knife":
                            knife = self._findItem(target_x, target_y, target_name)
                            if isinstance(knife.holding, Plate):
                                item = knife.holding
                                knife.release()
                                agent.pickup(item)
                            elif isinstance(knife.holding, Food):
                                if knife.holding.chopped:
                                    item = knife.holding
                                    knife.release()
                                    agent.pickup(item)
                                else:
                                    knife.holding.chop()
                                    if knife.holding.chopped:
                                        if self.task == "tomato-lettuce salad"\
                                        or (self.task == "tomato salad" and isinstance(knife.holding, Tomato)) \
                                        or (self.task == "lettuce salad" and isinstance(knife.holding, Lettuce)):
                                            reward += self.rewardList["subtask finished"]
                    #put down
                    elif agent.holding:
                        if target_name == "counter":
                            if isinstance(agent.holding, Tomato):
                                self.map[target_x][target_y] = ITEMIDX["tomato"]
                            elif isinstance(agent.holding, Lettuce):
                                self.map[target_x][target_y] = ITEMIDX["lettuce"]
                            elif isinstance(agent.holding, Plate):
                                self.map[target_x][target_y] = ITEMIDX["plate"]
                            agent.putdown(target_x, target_y)
                        elif target_name == "plate":
                            if isinstance(agent.holding, Food):
                                if agent.holding.chopped:
                                    plate = self._findItem(target_x, target_y, target_name)
                                    item = agent.holding
                                    agent.putdown(target_x, target_y)
                                    plate.contain(item)
                                    
                        elif target_name == "knife":
                            knife = self._findItem(target_x, target_y, target_name)
                            if not knife.holding:
                                item = agent.holding
                                agent.putdown(target_x, target_y)
                                knife.hold(item)
                            elif isinstance(knife.holding, Food) and isinstance(agent.holding, Plate):
                                item = knife.holding
                                if item.chopped:
                                    knife.release()
                                    agent.holding.contain(item)
                            elif isinstance(knife.holding, Plate) and isinstance(agent.holding, Food):
                                plate_item = knife.holding
                                food_item = agent.holding
                                if food_item.chopped:
                                    knife.release()
                                    agent.pickup(plate_item)
                                    agent.holding.contain(food_item)
                        elif target_name == "delivery":
                            if isinstance(agent.holding, Plate):
                                if agent.holding.containing:
                                    if len(agent.holding.containing) > 1 and self.task == "tomato-lettuce salad":
                                        reward += self.rewardList["correct delivery"]
                                        done = True
                                    elif len(agent.holding.containing) == 1 and \
                                        ((agent.holding.containing[0].rawName == "tomato" and self.task == "tomato salad") \
                                        or (agent.holding.containing[0].rawName == "lettuce" and self.task == "lettuce salad")):
                                        reward += self.rewardList["correct delivery"]
                                        done = True
                                    else:
                                        reward += self.rewardList["wrong delivery"]
                                        item = agent.holding
                                        agent.putdown(target_x, target_y)
                                        food = item.containing
                                        item.release()
                                        item.refresh()
                                        self.map[item.x][item.y] = ITEMIDX[item.name]
                                        for f in food:
                                            f.refresh()
                                            self.map[f.x][f.y] = ITEMIDX[f.rawName]


                        elif target_name == "tomato" or target_name == "lettuce":
                            item = self._findItem(target_x, target_y, target_name)
                            if item.chopped and isinstance(agent.holding, Plate):
                                agent.holding.contain(item)
                                self.map[target_x][target_y] = ITEMIDX["counter"]

            any_agent_moved = False
            for agent in self.agent:
                if agent.moved == True:
                    any_agent_moved == True
            if not any_agent_moved:
                break
        
        if done and self.debug:
            self.game.on_cleanup()
        return self._getObs(), [reward] * self.n_agent, done, info

    def render(self, mode='human'):
        return self.game.on_render()

    
