# Supplementary material
Source: ML conference proceedings conference paper supplement (https://proceedings.neurips.cc/paper_files/paper/2022/hash/1c153788756d35559c22d105d1182c30-Abstract.html)
Supplement: Supplementary file 1 [file 1c153788756d35559c22d105d1182c30-Supplemental-Conference.zip › Supplementary Material/Code/src/macro_marl/my_env/overcooked/render/utils.py]

import pygame


class Color:
    BLACK = (0, 0, 0)
    FLOOR = (245, 230, 210)  # light gray
    COUNTER = (220, 170, 110)   # tan/gray
    COUNTER_BORDER = (114, 93, 51)  # darker tan
    DELIVERY = (96, 96, 96)  # grey

KeyToTuple = {
    pygame.K_UP    : ( 0, -1),  #273
    pygame.K_DOWN  : ( 0,  1),  #274
    pygame.K_RIGHT : ( 1,  0),  #275
    pygame.K_LEFT  : (-1,  0),  #276
}
