# Supplementary material
Source: ML conference proceedings conference paper supplement (https://proceedings.neurips.cc/paper_files/paper/2022/hash/1c153788756d35559c22d105d1182c30-Abstract.html)
Supplement: Supplementary file 1 [file 1c153788756d35559c22d105d1182c30-Supplemental-Conference.zip › Supplementary Material/Code/visualization/test_bp_ma.py]

import argparse
import gym
import numpy as np
import torch
import os
import sys
sys.path.append("..")
import time
import IPython

from macro_marl.my_env.box_pushing_MA import BoxPushing_harder as BP_MA

from macro_marl.MA_iaicc_rnn_V.utils import Agent
from IPython.core.debugger import set_trace

ACTIONS = ["GT_SB0", "GT_SB1", "GT_BB0", "GT_BB1", "PUSH", "T_L", "T_R", "STAY"]

ENVIRONMENTS = {
        'BP_MA': BP_MA}

def get_actions_and_h_states(env, agents, last_valid, joint_obs, joint_h_states):
    with torch.no_grad():
        actions = []
        h_states = []
        for idx,agent in enumerate(agents):
            if last_valid[agent.idx]:
                Q, h = agent.policy_net(joint_obs[agent.idx].view(1,1,env.obs_size[agent.idx]), joint_h_states[agent.idx])
                a = Q.squeeze(1).max(1)[1].item()
                actions.append(a)
                h_states.append(h)
            else:
                actions.append(env.agents[agent.idx].cur_action.idx)
                h_states.append(joint_h_states[agent.idx])

    return actions, joint_h_states

def get_init_inputs(env,n_agent):
    return [torch.from_numpy(i).float() for i in env.reset()], [None]*n_agent

def test(env_id, env_terminate_step, grid_dim, n_agent, n_episode, scenario, p_id):
    env_params = {'grid_dim': grid_dim,
                  'n_agent': n_agent,
                  'penalty': -10,
                  'big_box_reward': 300,
                  'small_box_reward': 20,
                  'random_init': False,
                  'render': True,
                  }

 
    env = gym.make(env_id, **env_params)

    agents = []
    
    for i in range(n_agent):
        agent = Agent()
        agent.idx = i
        agent.policy_net = torch.load("./policy_nns/BP_MA/" + scenario + "/" + str(p_id) + "_agent_" + str(i) + ".pt")
        agent.policy_net.eval()
        agents.append(agent)

    R = 0
    discount=0.95
    step = 0.0

    for e in range(n_episode):
        t = 0
        last_obs, h_states = get_init_inputs(env, n_agent)
        last_valid = [1.0] * n_agent
        while not t:
            a, h_states = get_actions_and_h_states(env, agents, last_valid, last_obs, h_states)
            time.sleep(0.2)
            last_obs, r, t, info = env.step(a)
            last_obs = [torch.from_numpy(o).float() for o in last_obs]
            last_valid = info['mac_done'] 
            R += discount**step*r[0]
            step += 1.0
        time.sleep(0.2)

    time.sleep(1)

def main():
    parser = argparse.ArgumentParser()
    parser.add_argument('--env_id', action='store', type=str, default='BP-MA-v0')
    parser.add_argument('--p_id', action='store', type=int, default=0)
    parser.add_argument('--scenario', action='store', type=str, default='8x8')
    parser.add_argument('--env_terminate_step', action='store', type=int, default=100)
    parser.add_argument('--grid_dim', action='store', type=int, nargs=2, default=[10,10])
    parser.add_argument('--n_agent', action='store', type=int, default=2)
    parser.add_argument('--n_episode', action='store', type=int, default=1)

    test(**vars(parser.parse_args()))

if __name__ == '__main__':
    main()
