# Supplementary material
Source: ML conference proceedings conference paper supplement (https://proceedings.neurips.cc/paper_files/paper/2022/hash/1c153788756d35559c22d105d1182c30-Abstract.html)

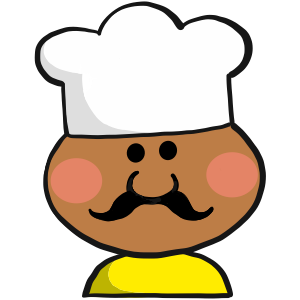

Supplement: Supplementary file 1 [file 1c153788756d35559c22d105d1182c30-Supplemental-Conference.zip › Supplementary Material/Code/src/macro_marl/my_env/overcooked/render/graphics/agent-yellow.png]

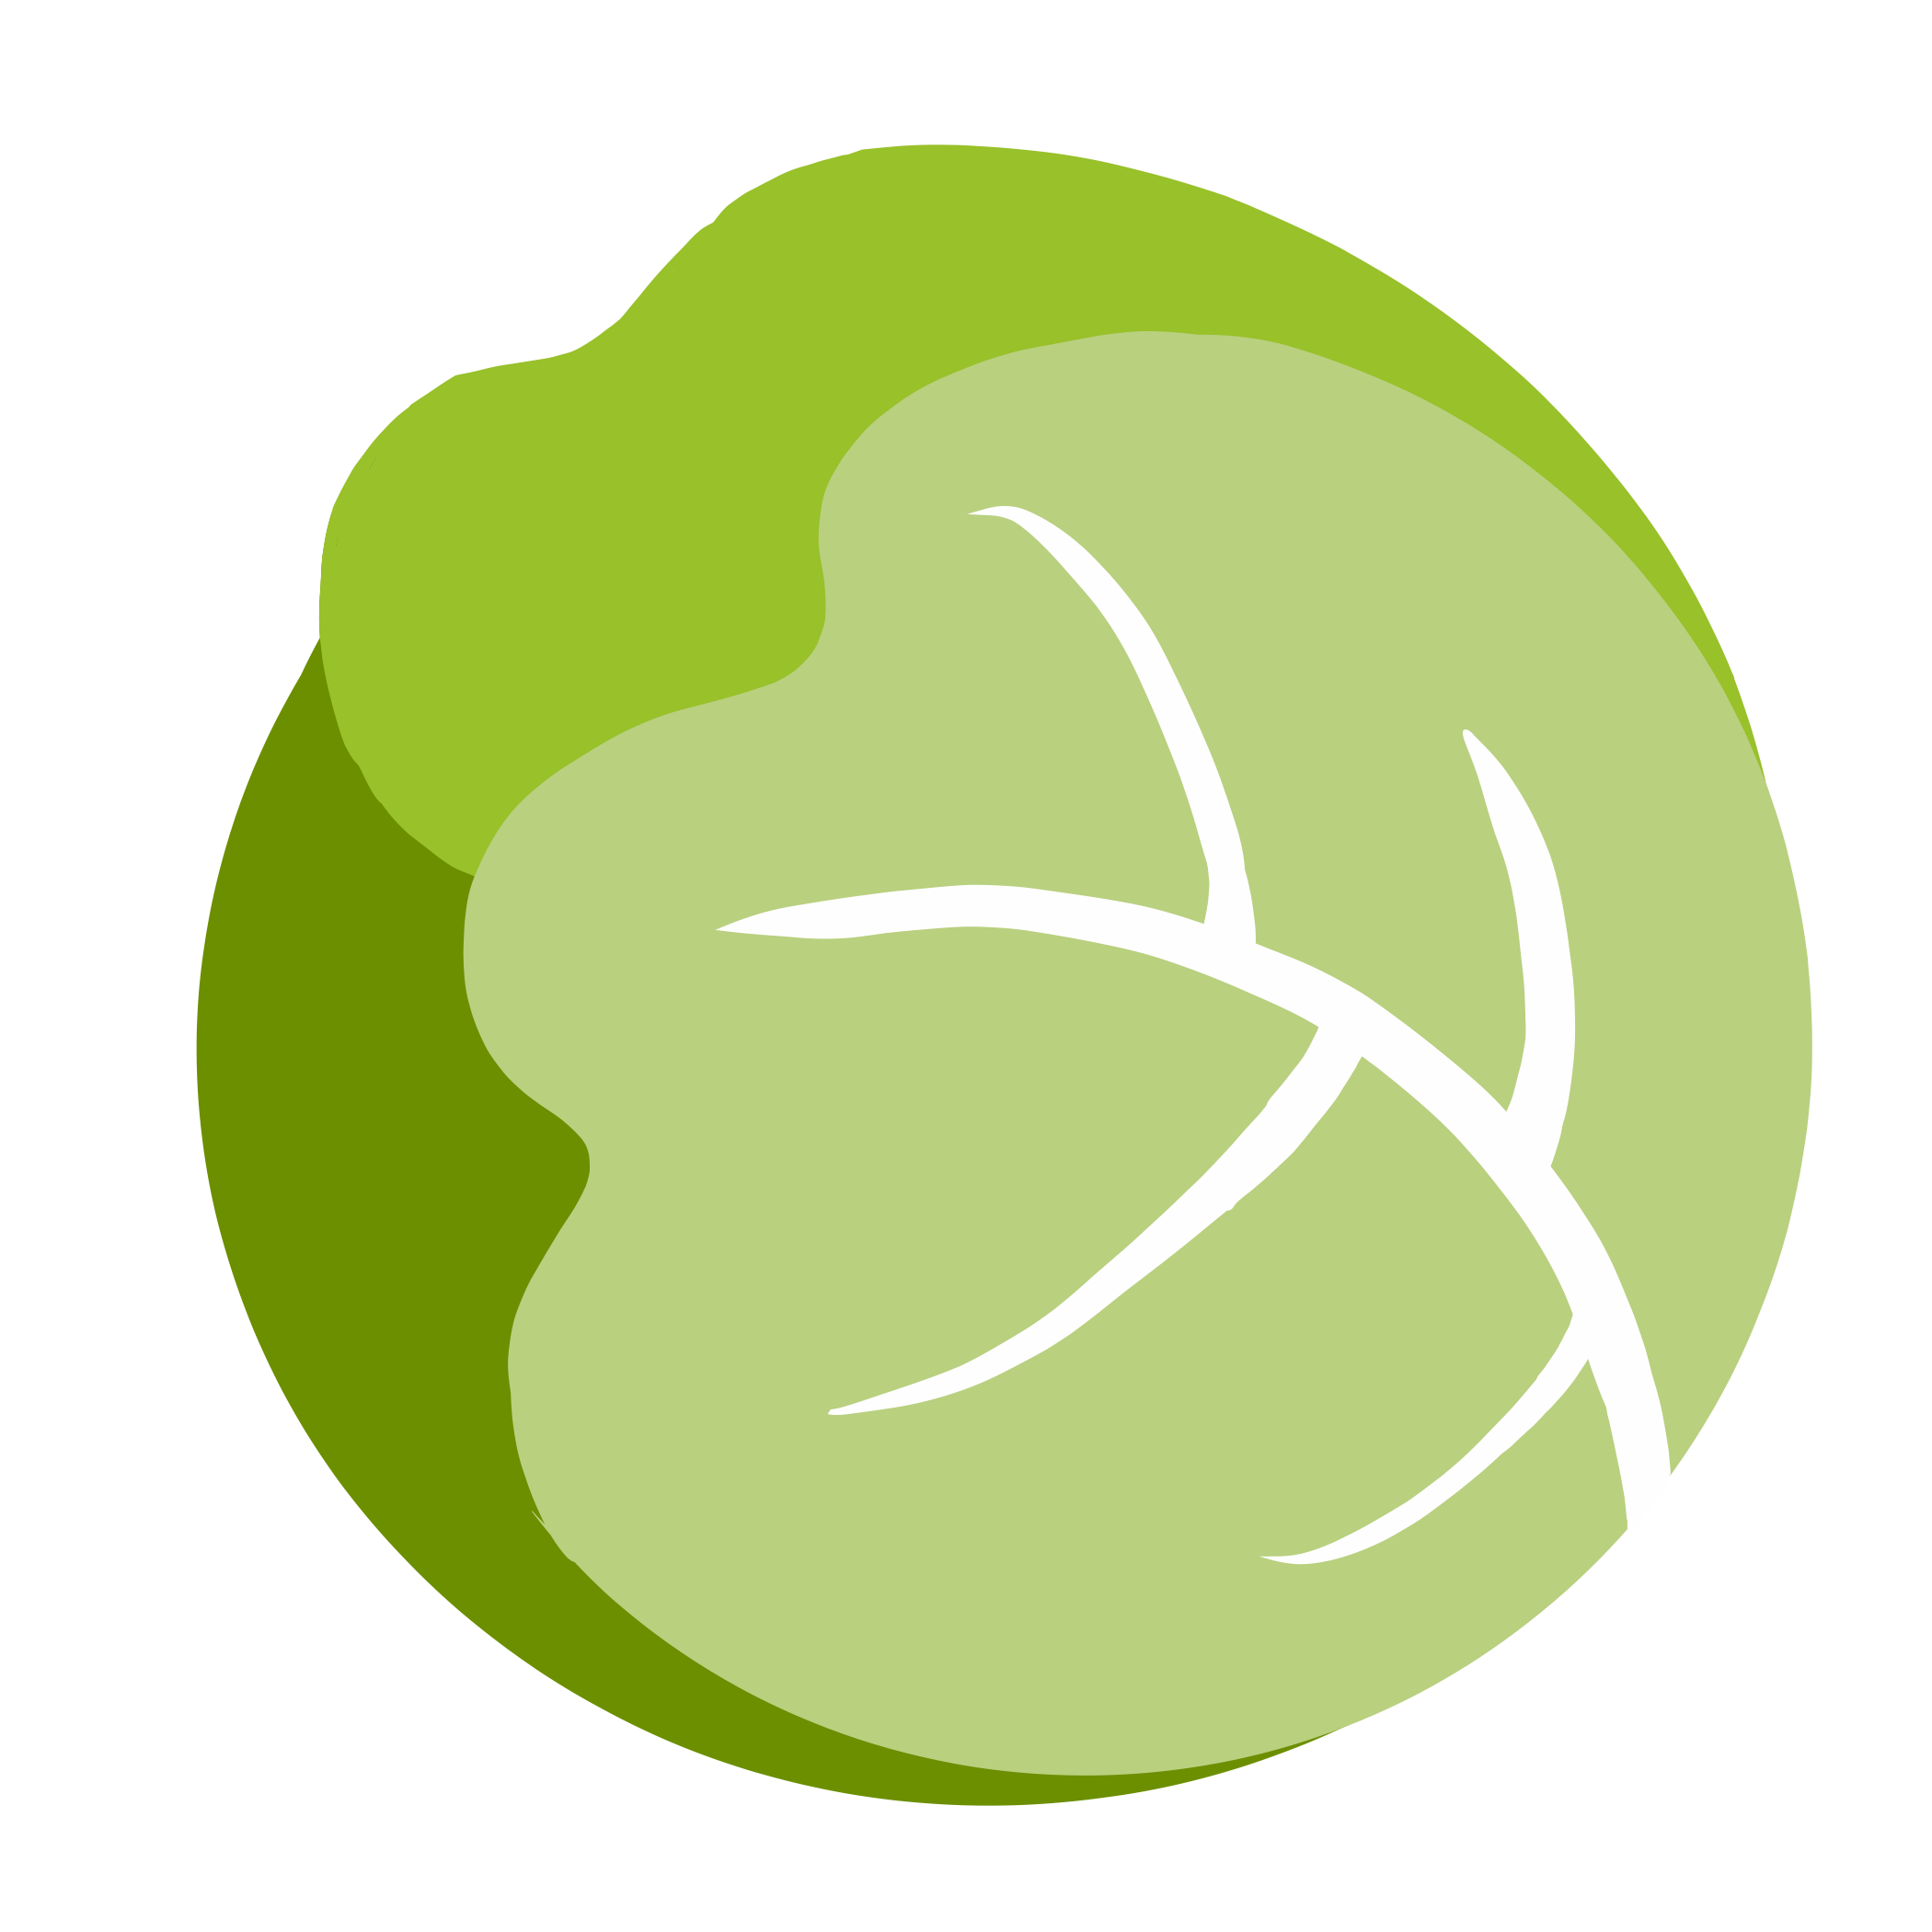

Supplement: Supplementary file 1 [file 1c153788756d35559c22d105d1182c30-Supplemental-Conference.zip › Supplementary Material/Code/src/macro_marl/my_env/overcooked/render/graphics/FreshLettuce.png]

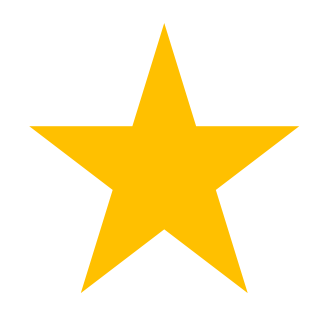

Supplement: Supplementary file 1 [file 1c153788756d35559c22d105d1182c30-Supplemental-Conference.zip › Supplementary Material/Code/src/macro_marl/my_env/overcooked/render/graphics/delivery.png]

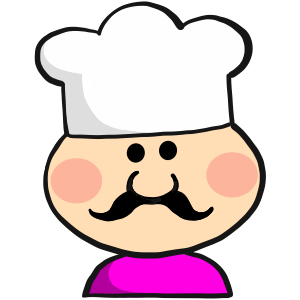

Supplement: Supplementary file 1 [file 1c153788756d35559c22d105d1182c30-Supplemental-Conference.zip › Supplementary Material/Code/src/macro_marl/my_env/overcooked/render/graphics/agent-magenta.png]

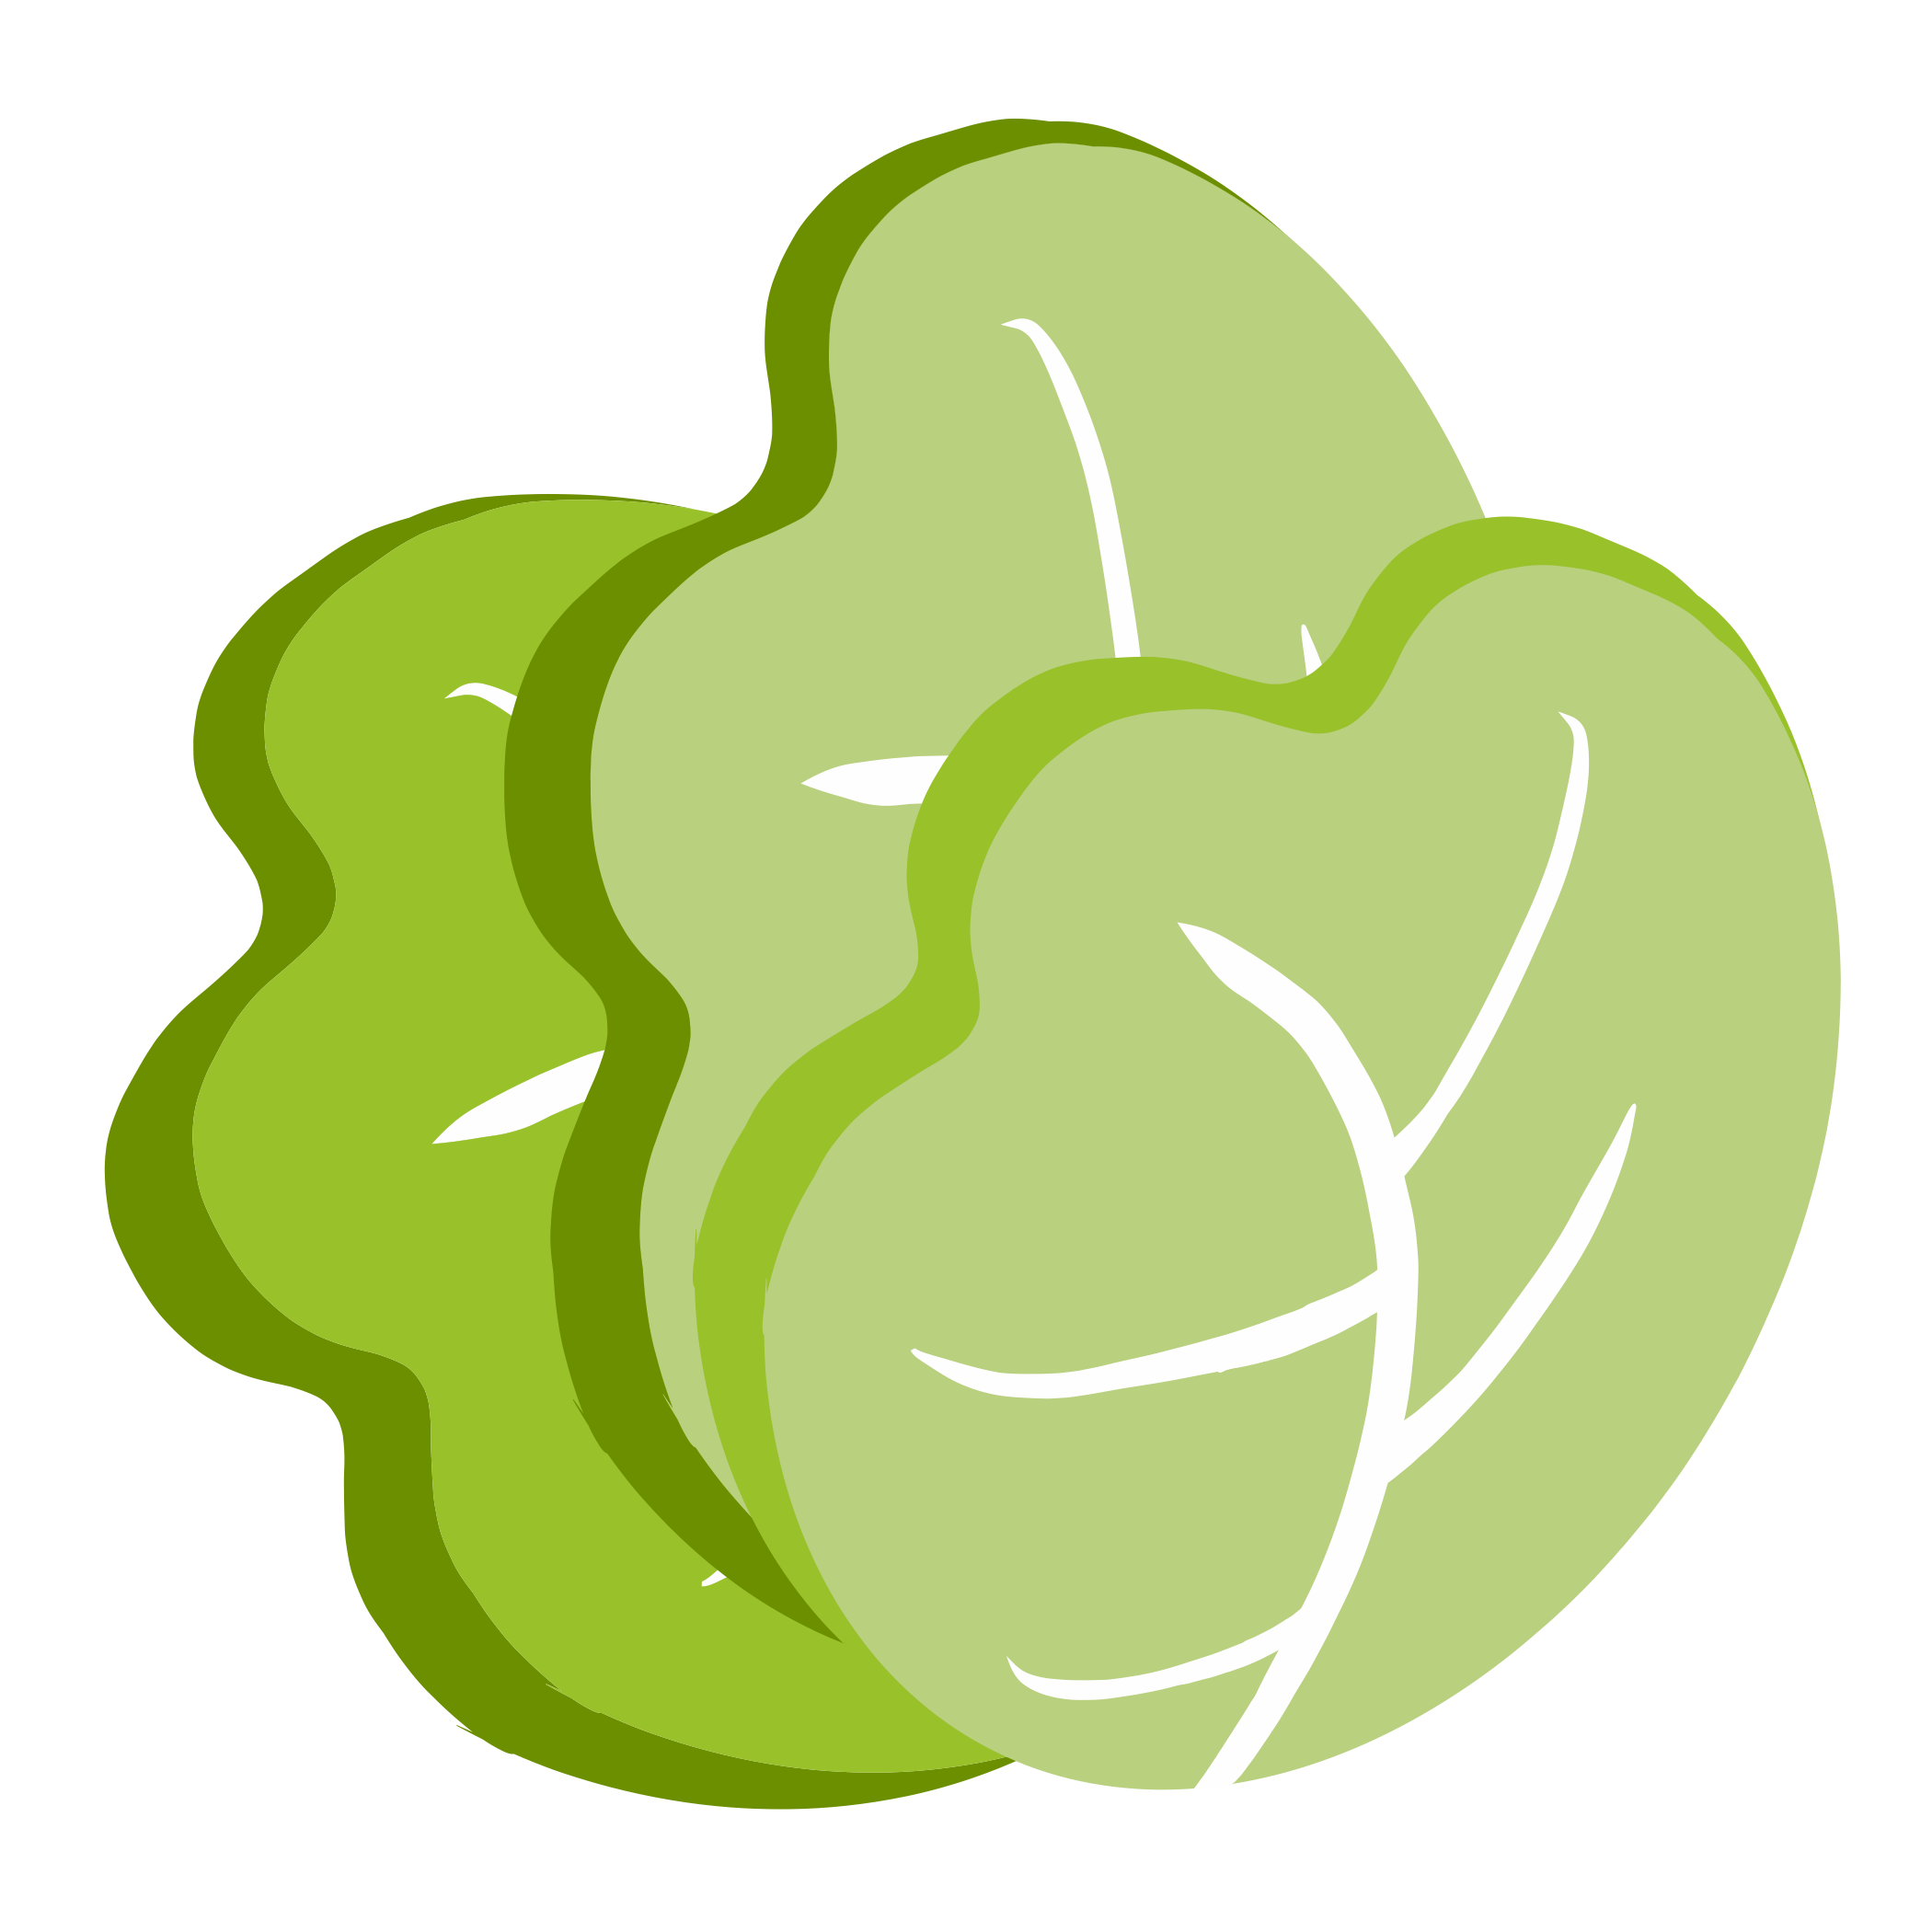

Supplement: Supplementary file 1 [file 1c153788756d35559c22d105d1182c30-Supplemental-Conference.zip › Supplementary Material/Code/src/macro_marl/my_env/overcooked/render/graphics/ChoppedLettuce.png]

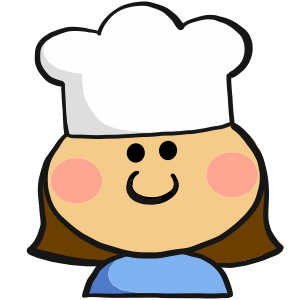

Supplement: Supplementary file 1 [file 1c153788756d35559c22d105d1182c30-Supplemental-Conference.zip › Supplementary Material/Code/src/macro_marl/my_env/overcooked/render/graphics/agent-blue.png]

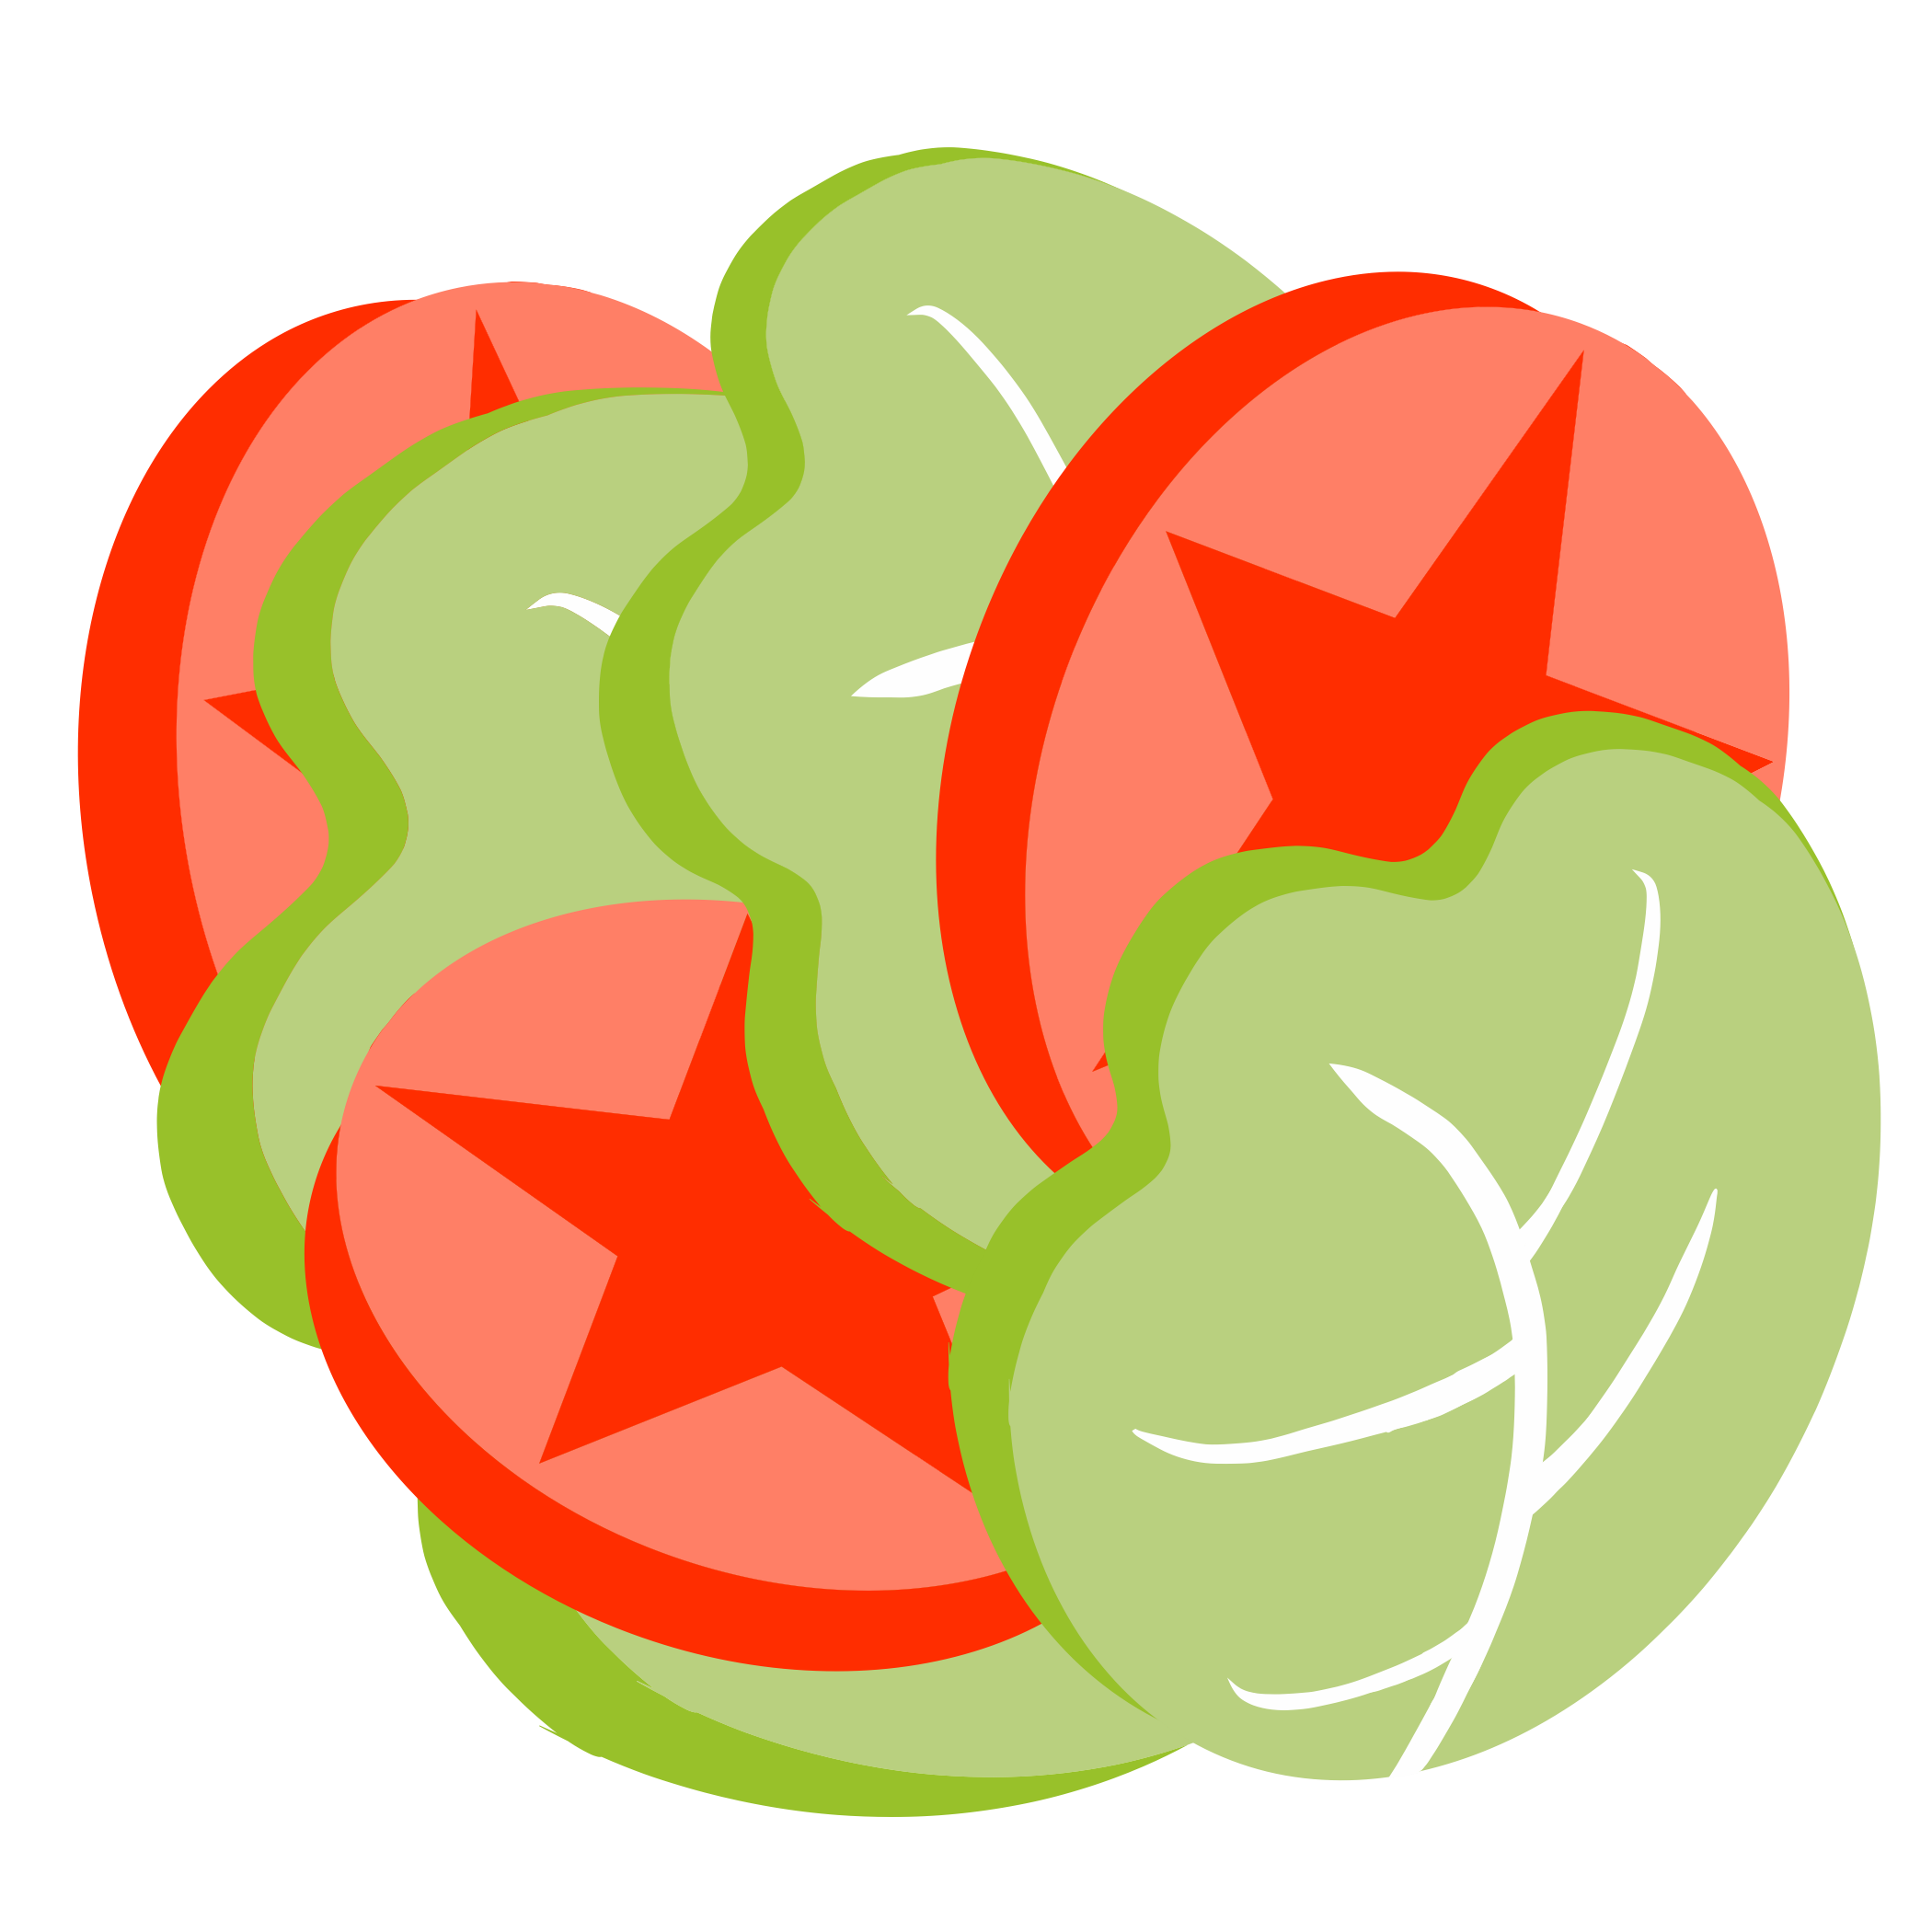

Supplement: Supplementary file 1 [file 1c153788756d35559c22d105d1182c30-Supplemental-Conference.zip › Supplementary Material/Code/src/macro_marl/my_env/overcooked/render/graphics/ChoppedLettuce-ChoppedTomato.png]

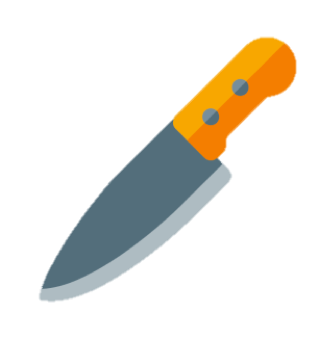

Supplement: Supplementary file 1 [file 1c153788756d35559c22d105d1182c30-Supplemental-Conference.zip › Supplementary Material/Code/src/macro_marl/my_env/overcooked/render/graphics/cutboard.png]

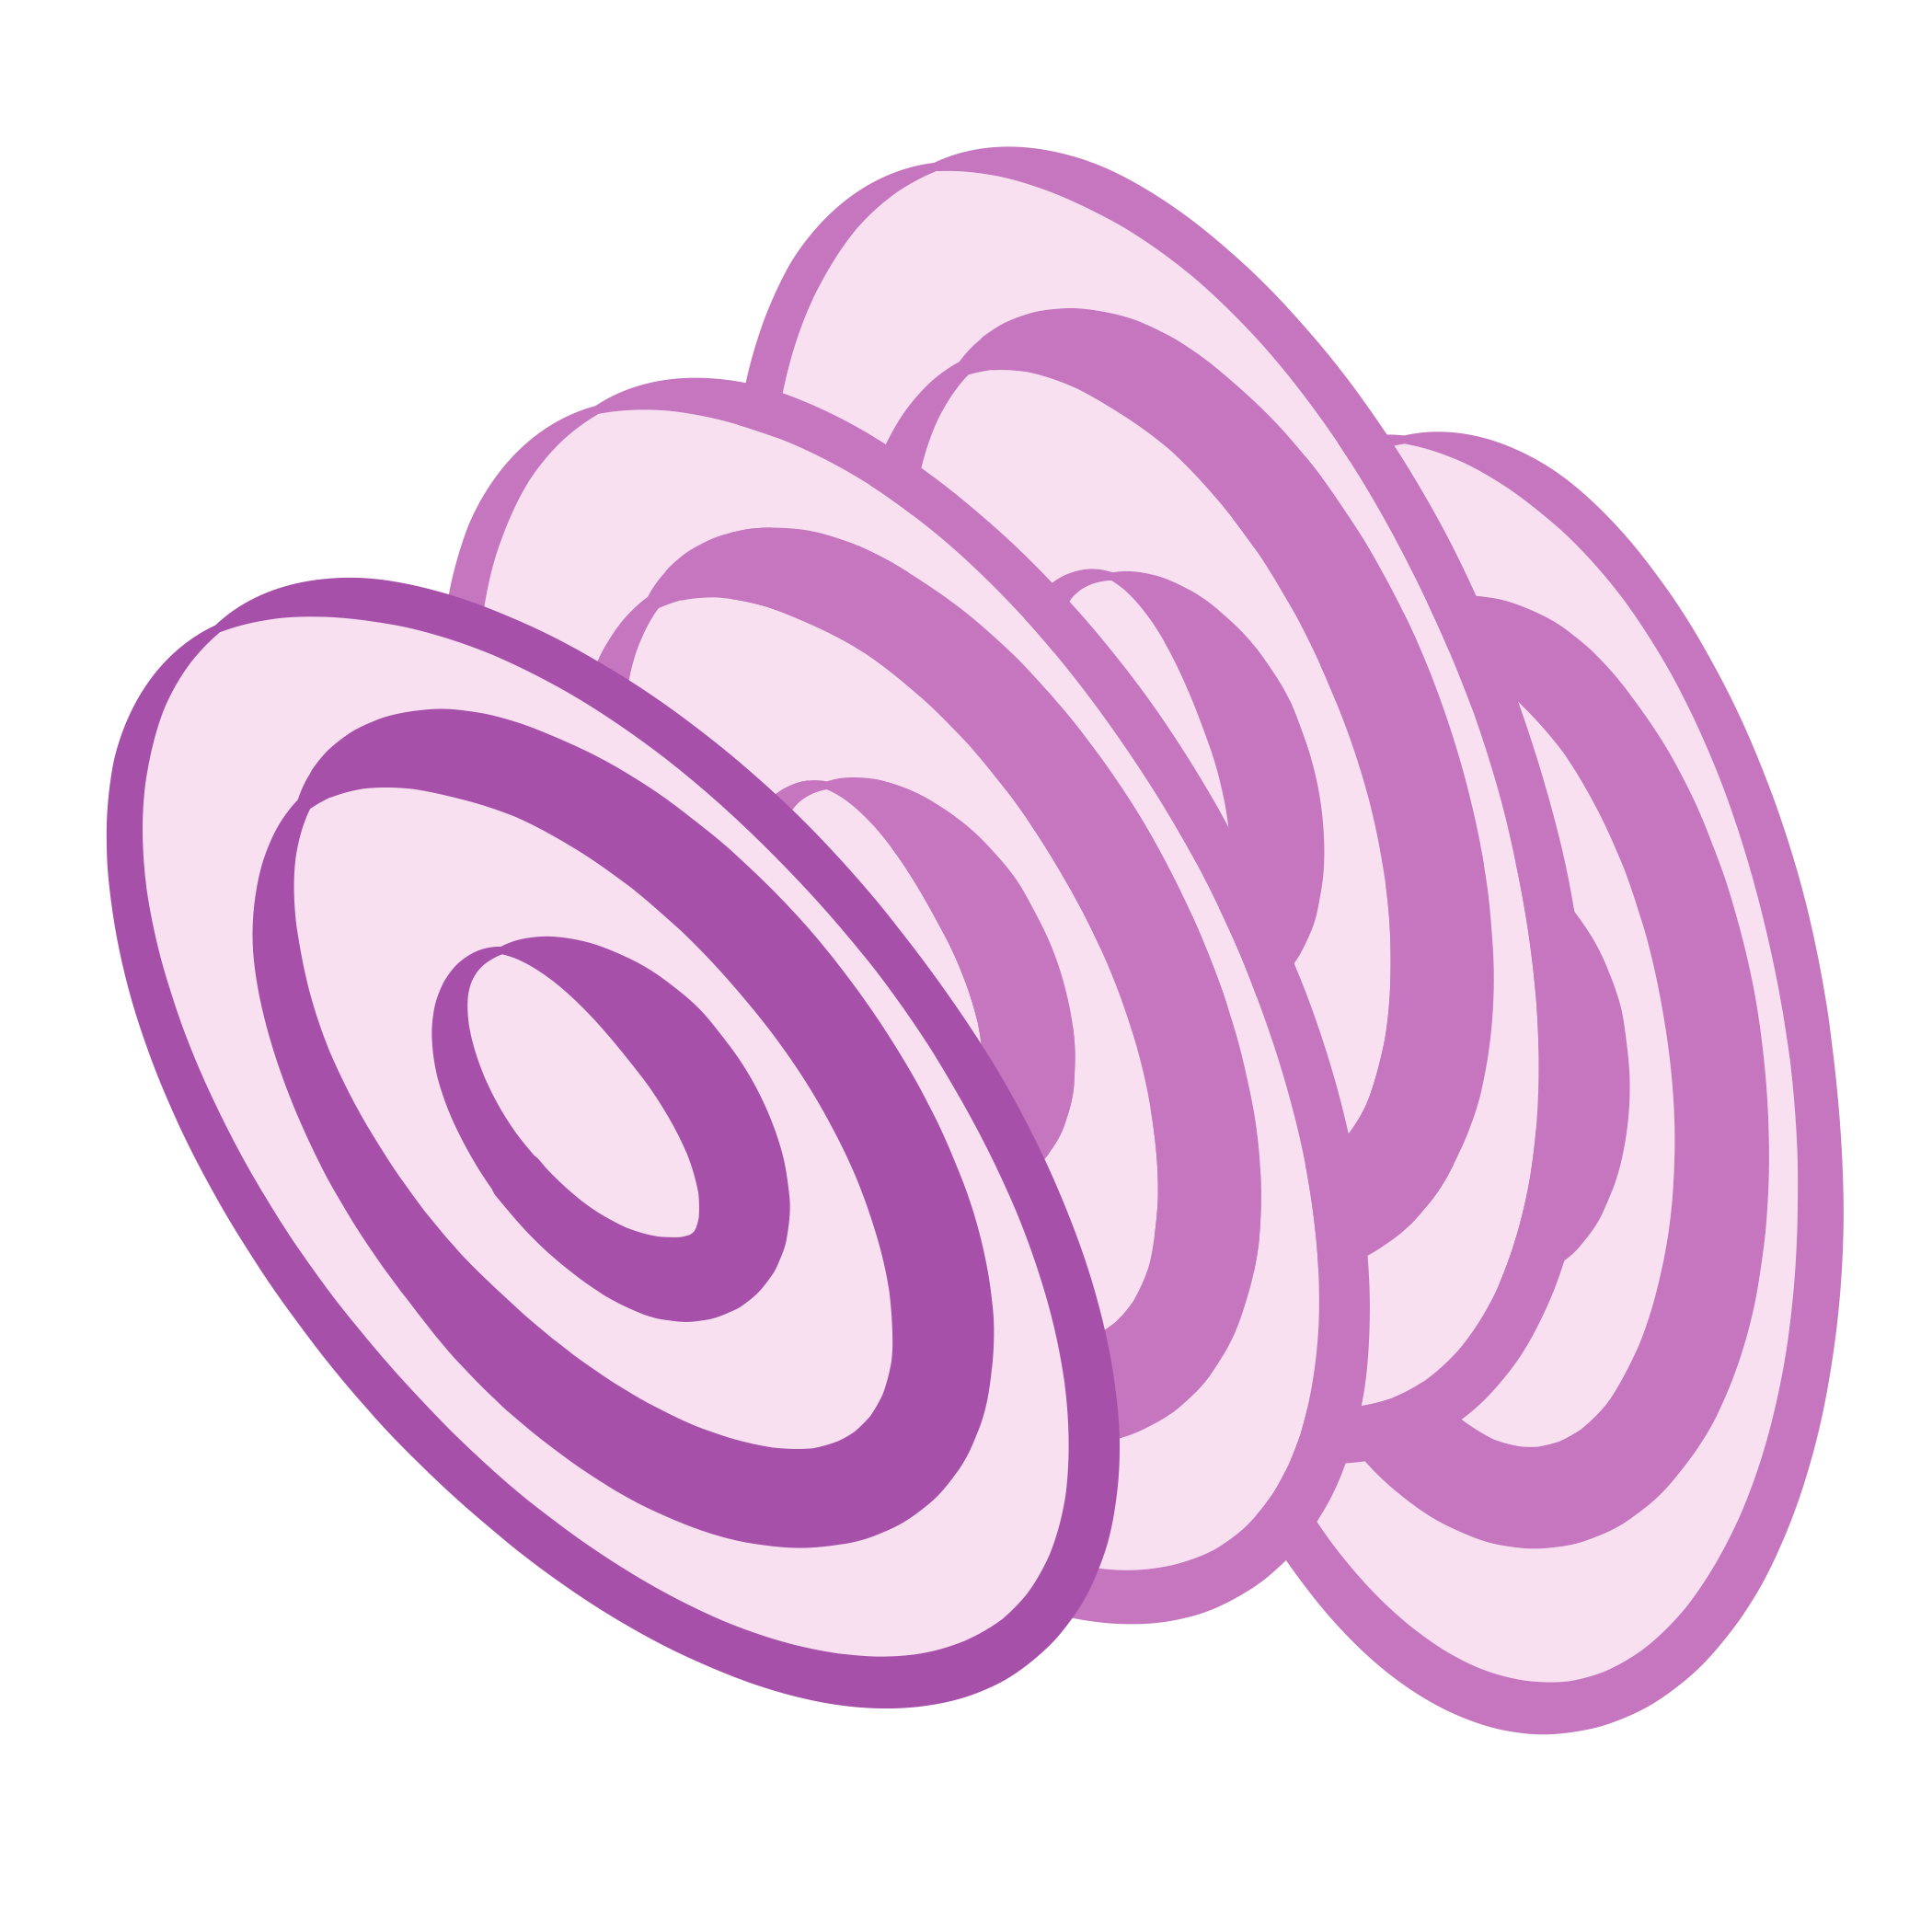

Supplement: Supplementary file 1 [file 1c153788756d35559c22d105d1182c30-Supplemental-Conference.zip › Supplementary Material/Code/src/macro_marl/my_env/overcooked/render/graphics/ChoppedOnion.png]

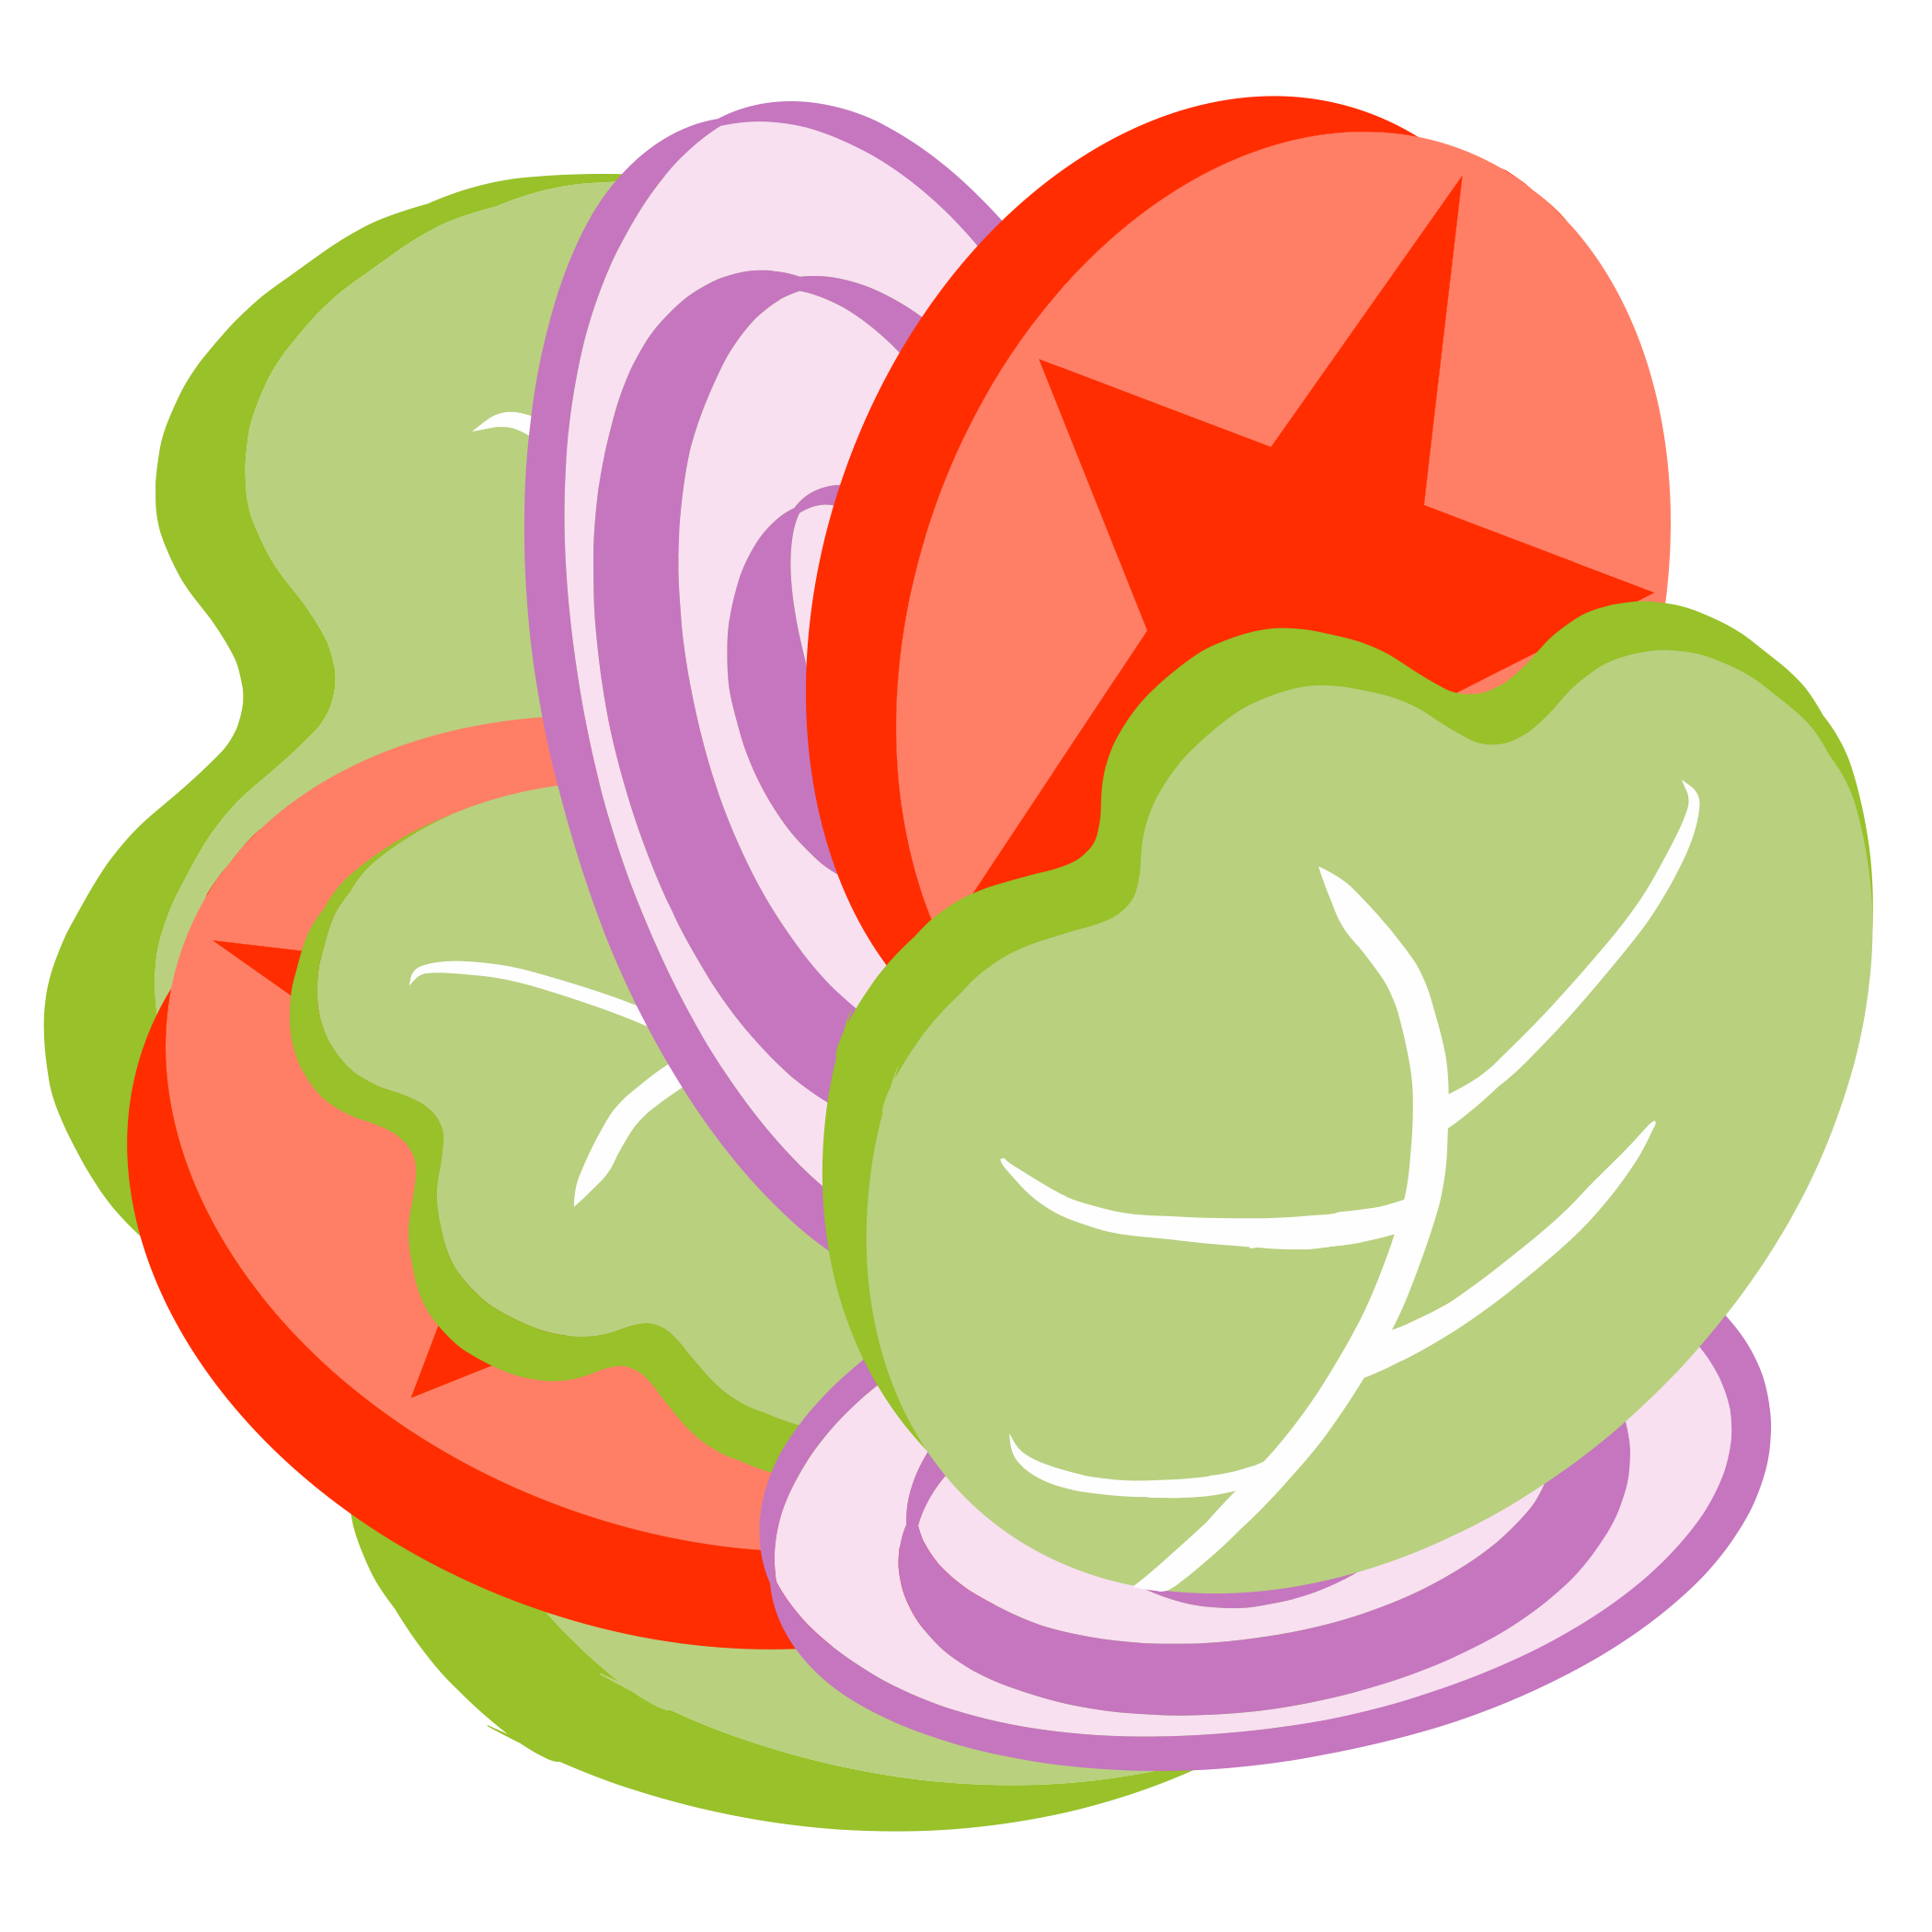

Supplement: Supplementary file 1 [file 1c153788756d35559c22d105d1182c30-Supplemental-Conference.zip › Supplementary Material/Code/src/macro_marl/my_env/overcooked/render/graphics/ChoppedLettuce-ChoppedOnion-ChoppedTomato.png]

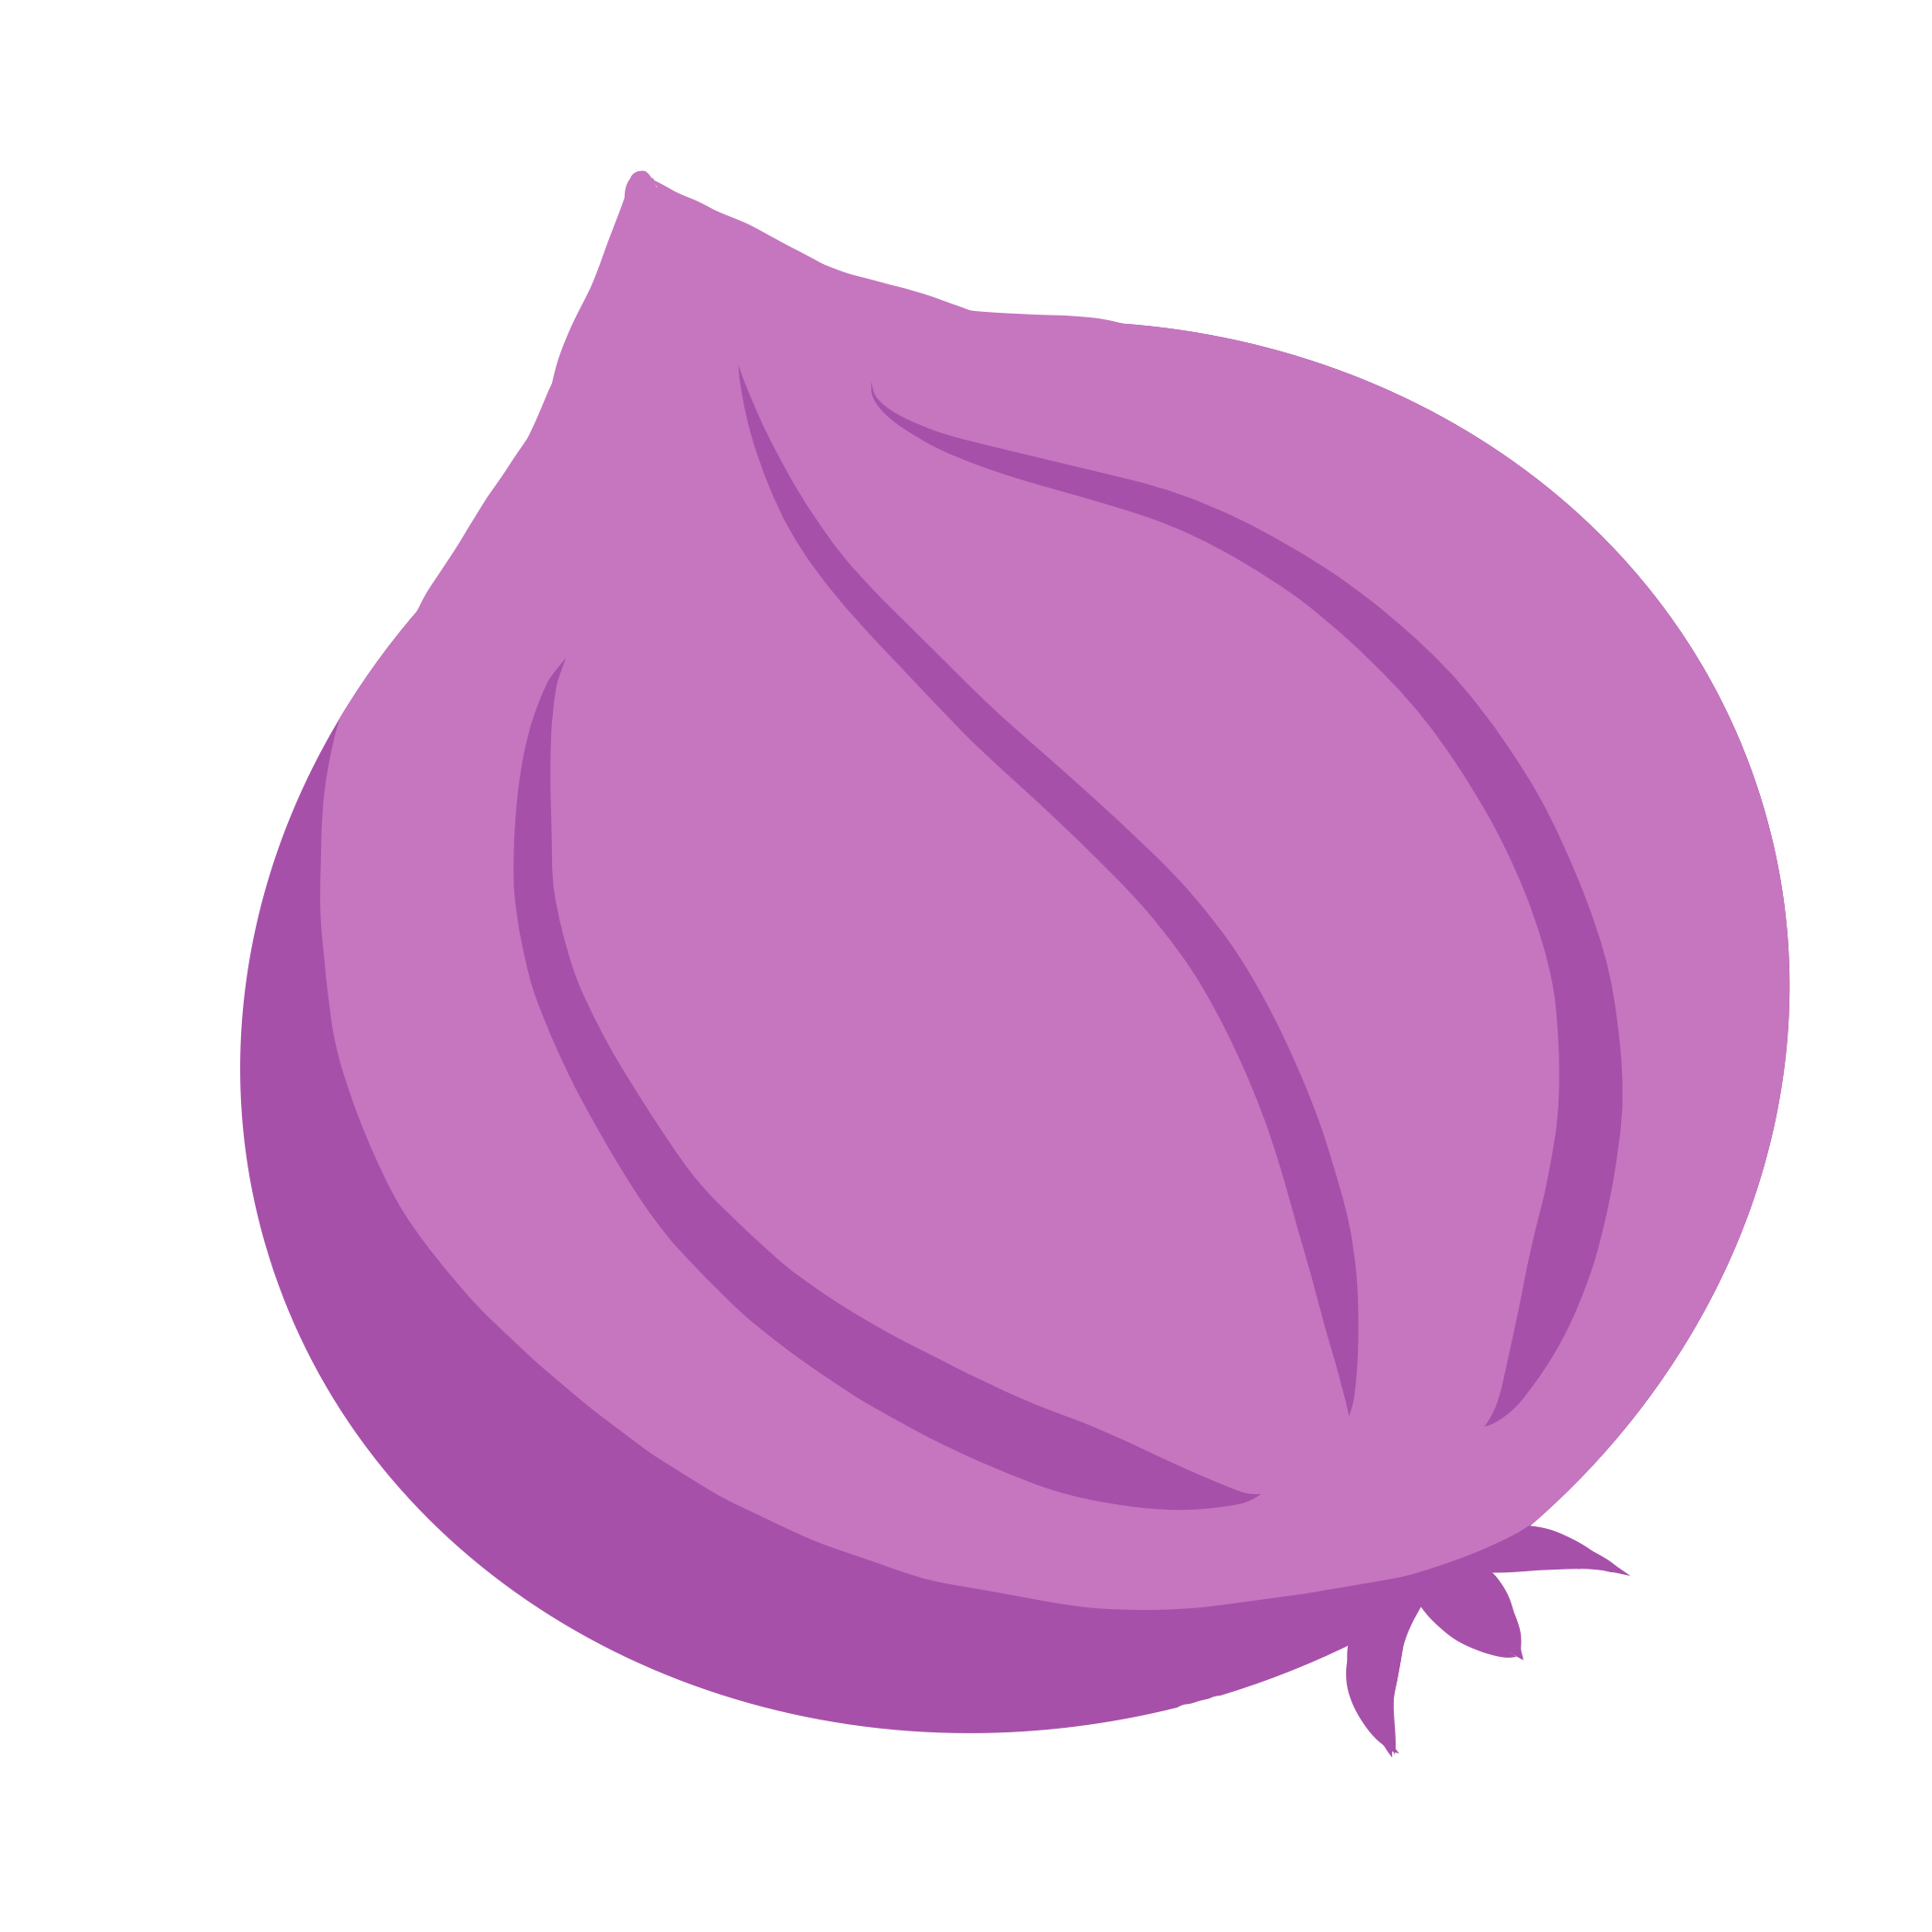

Supplement: Supplementary file 1 [file 1c153788756d35559c22d105d1182c30-Supplemental-Conference.zip › Supplementary Material/Code/src/macro_marl/my_env/overcooked/render/graphics/FreshOnion.png]

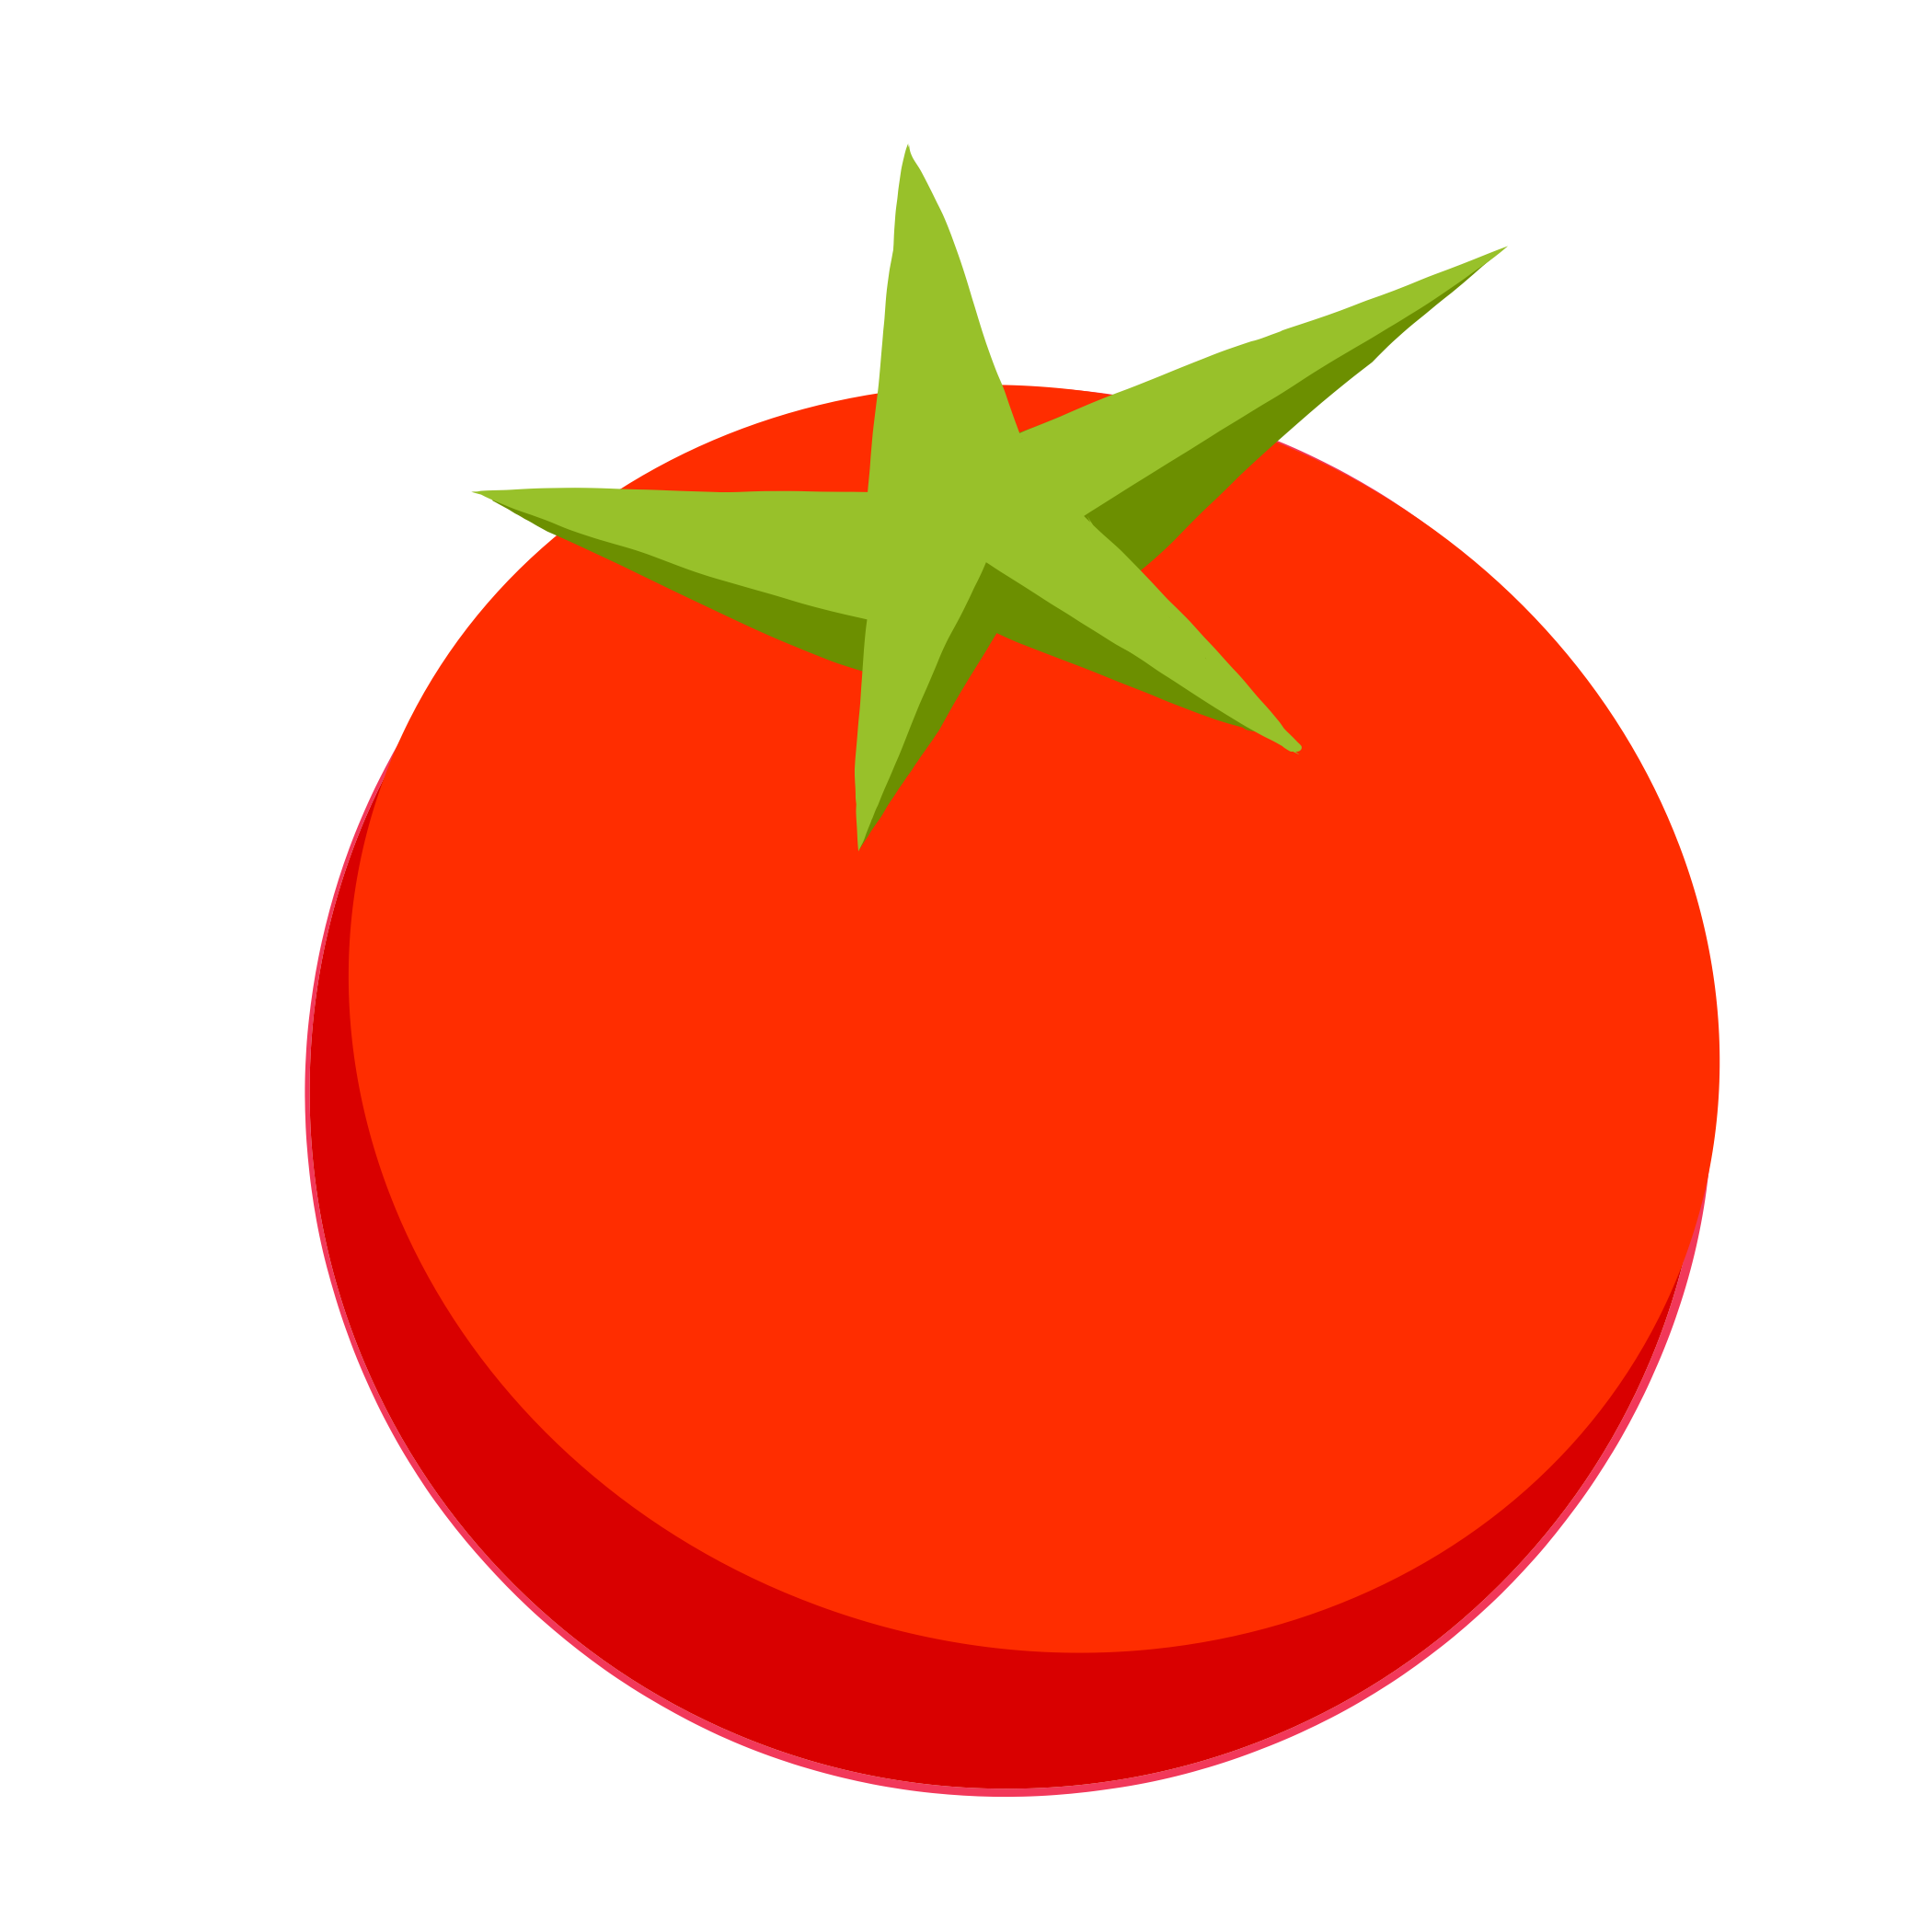

Supplement: Supplementary file 1 [file 1c153788756d35559c22d105d1182c30-Supplemental-Conference.zip › Supplementary Material/Code/src/macro_marl/my_env/overcooked/render/graphics/FreshTomato.png]

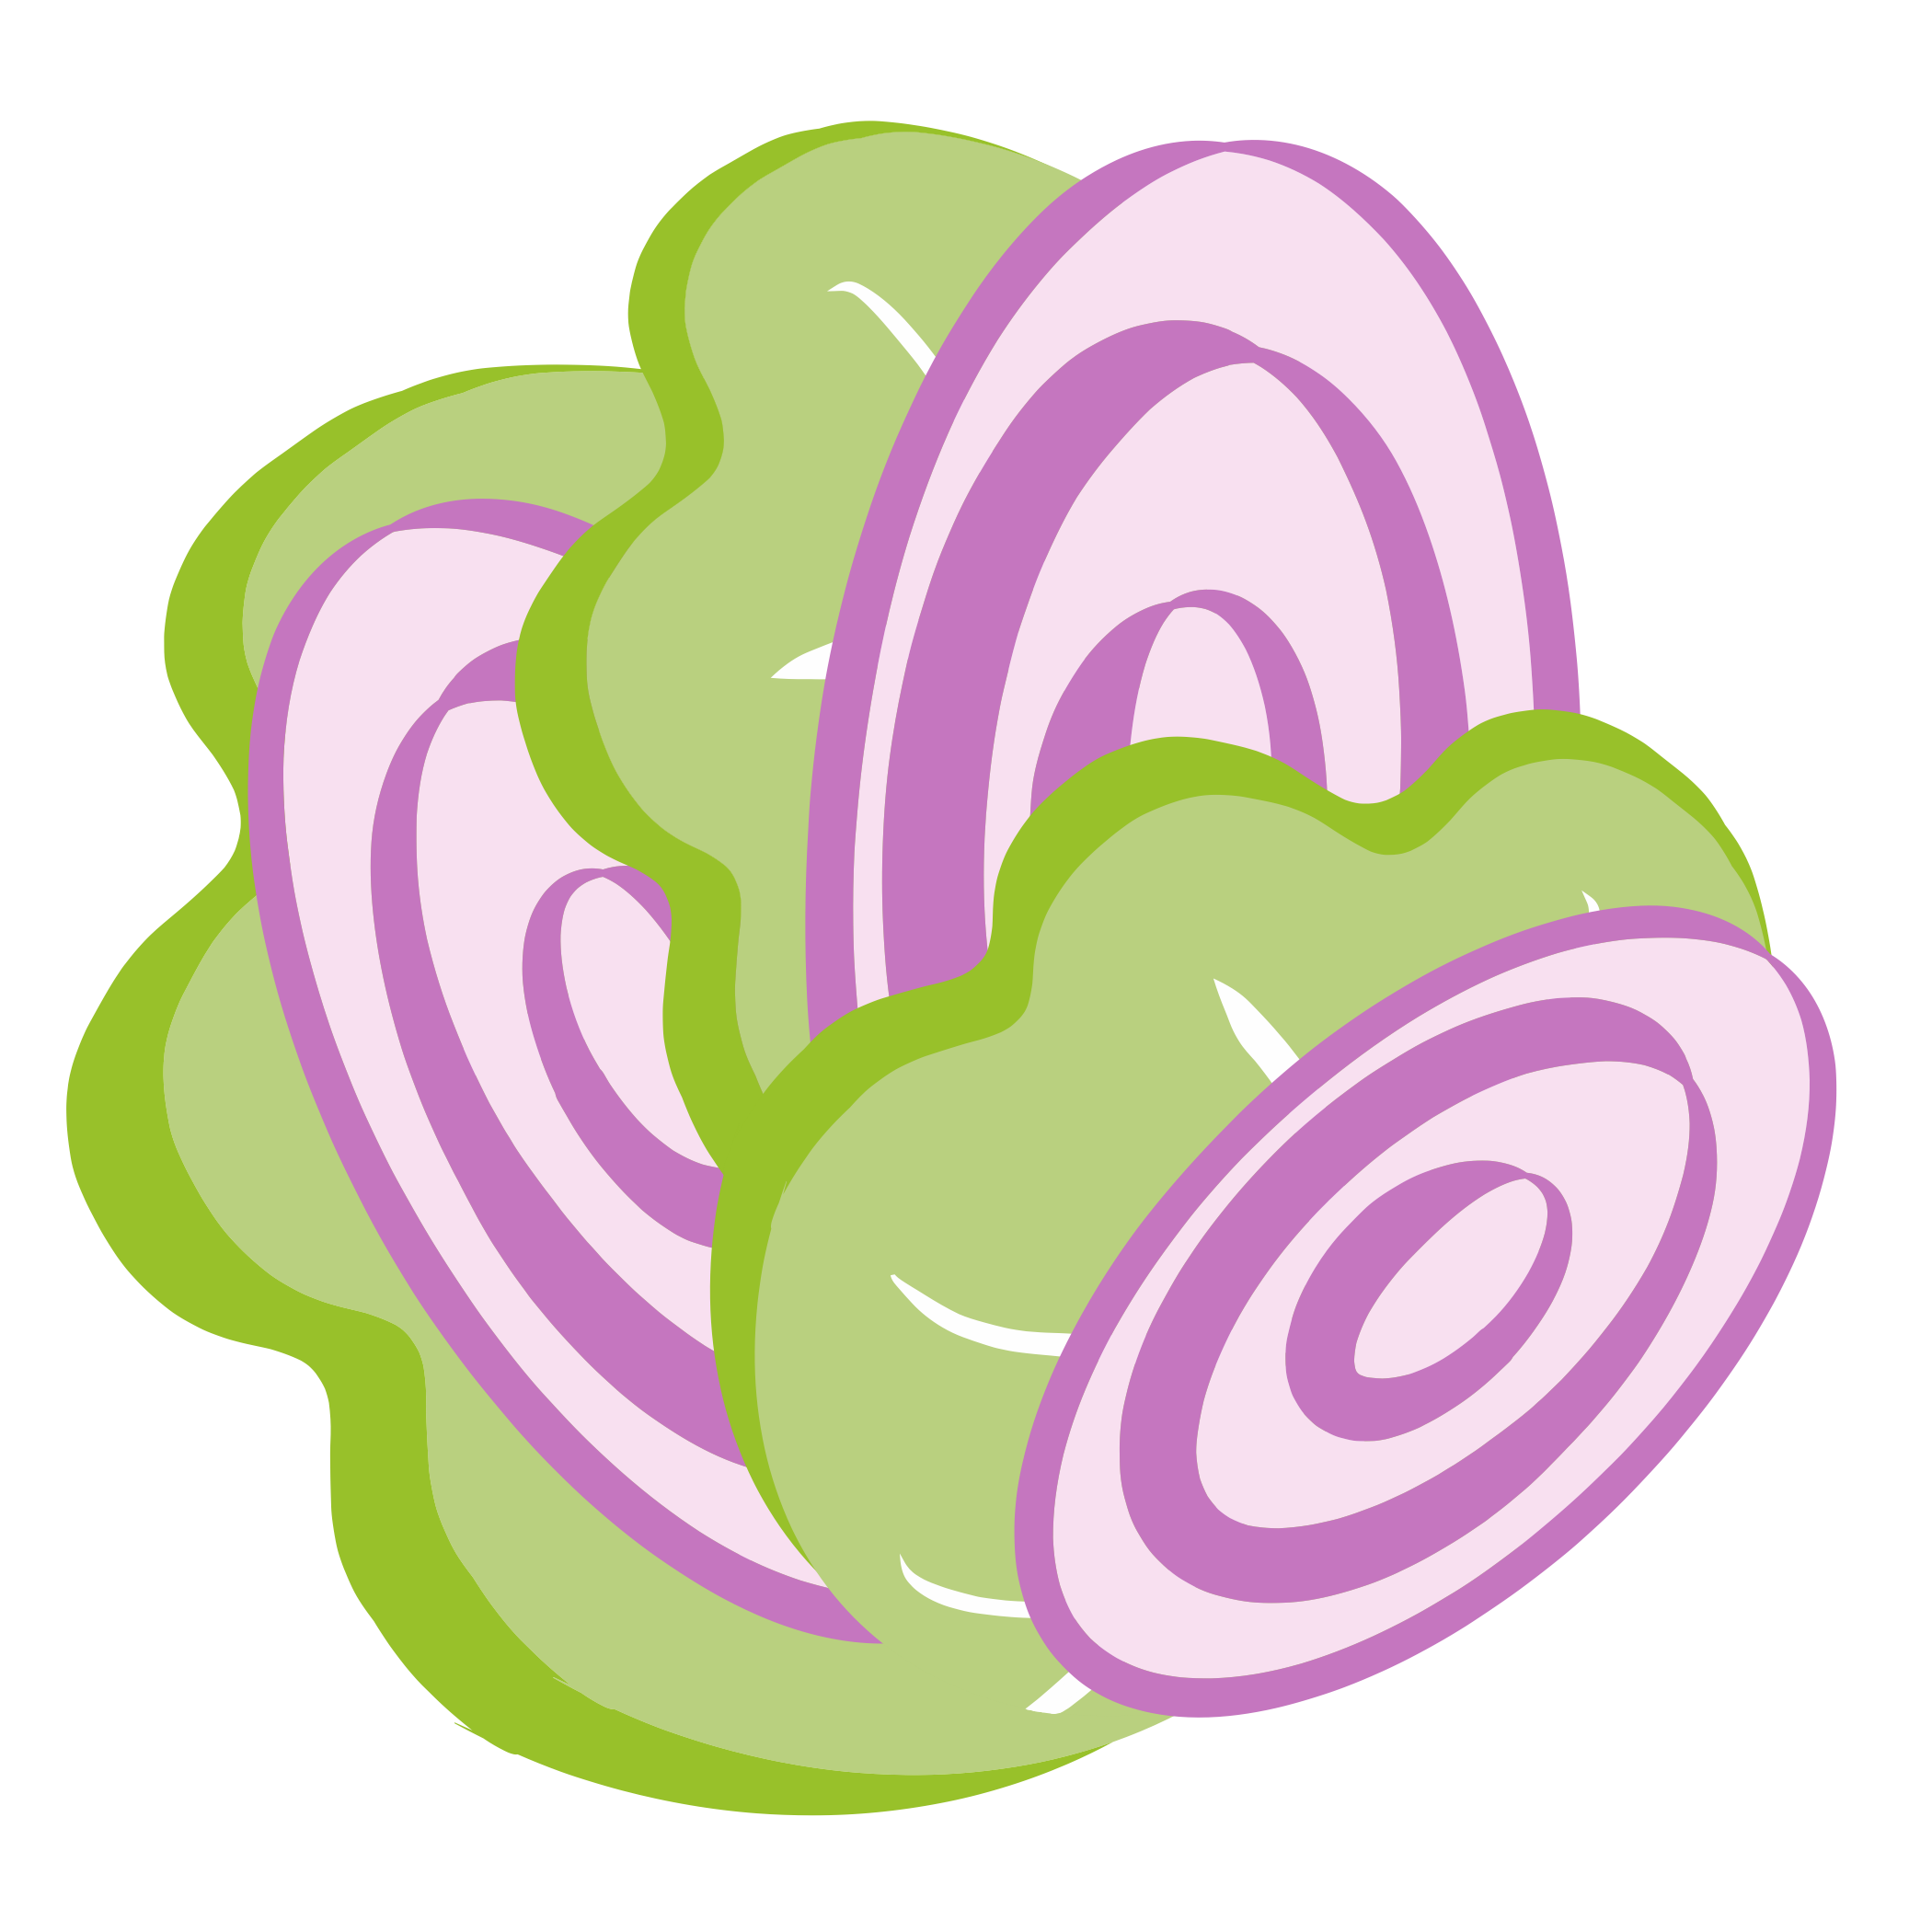

Supplement: Supplementary file 1 [file 1c153788756d35559c22d105d1182c30-Supplemental-Conference.zip › Supplementary Material/Code/src/macro_marl/my_env/overcooked/render/graphics/ChoppedLettuce-ChoppedOnion.png]

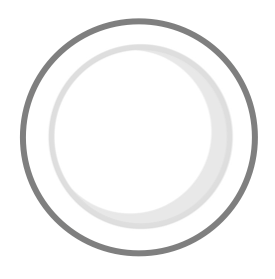

Supplement: Supplementary file 1 [file 1c153788756d35559c22d105d1182c30-Supplemental-Conference.zip › Supplementary Material/Code/src/macro_marl/my_env/overcooked/render/graphics/plate.png]

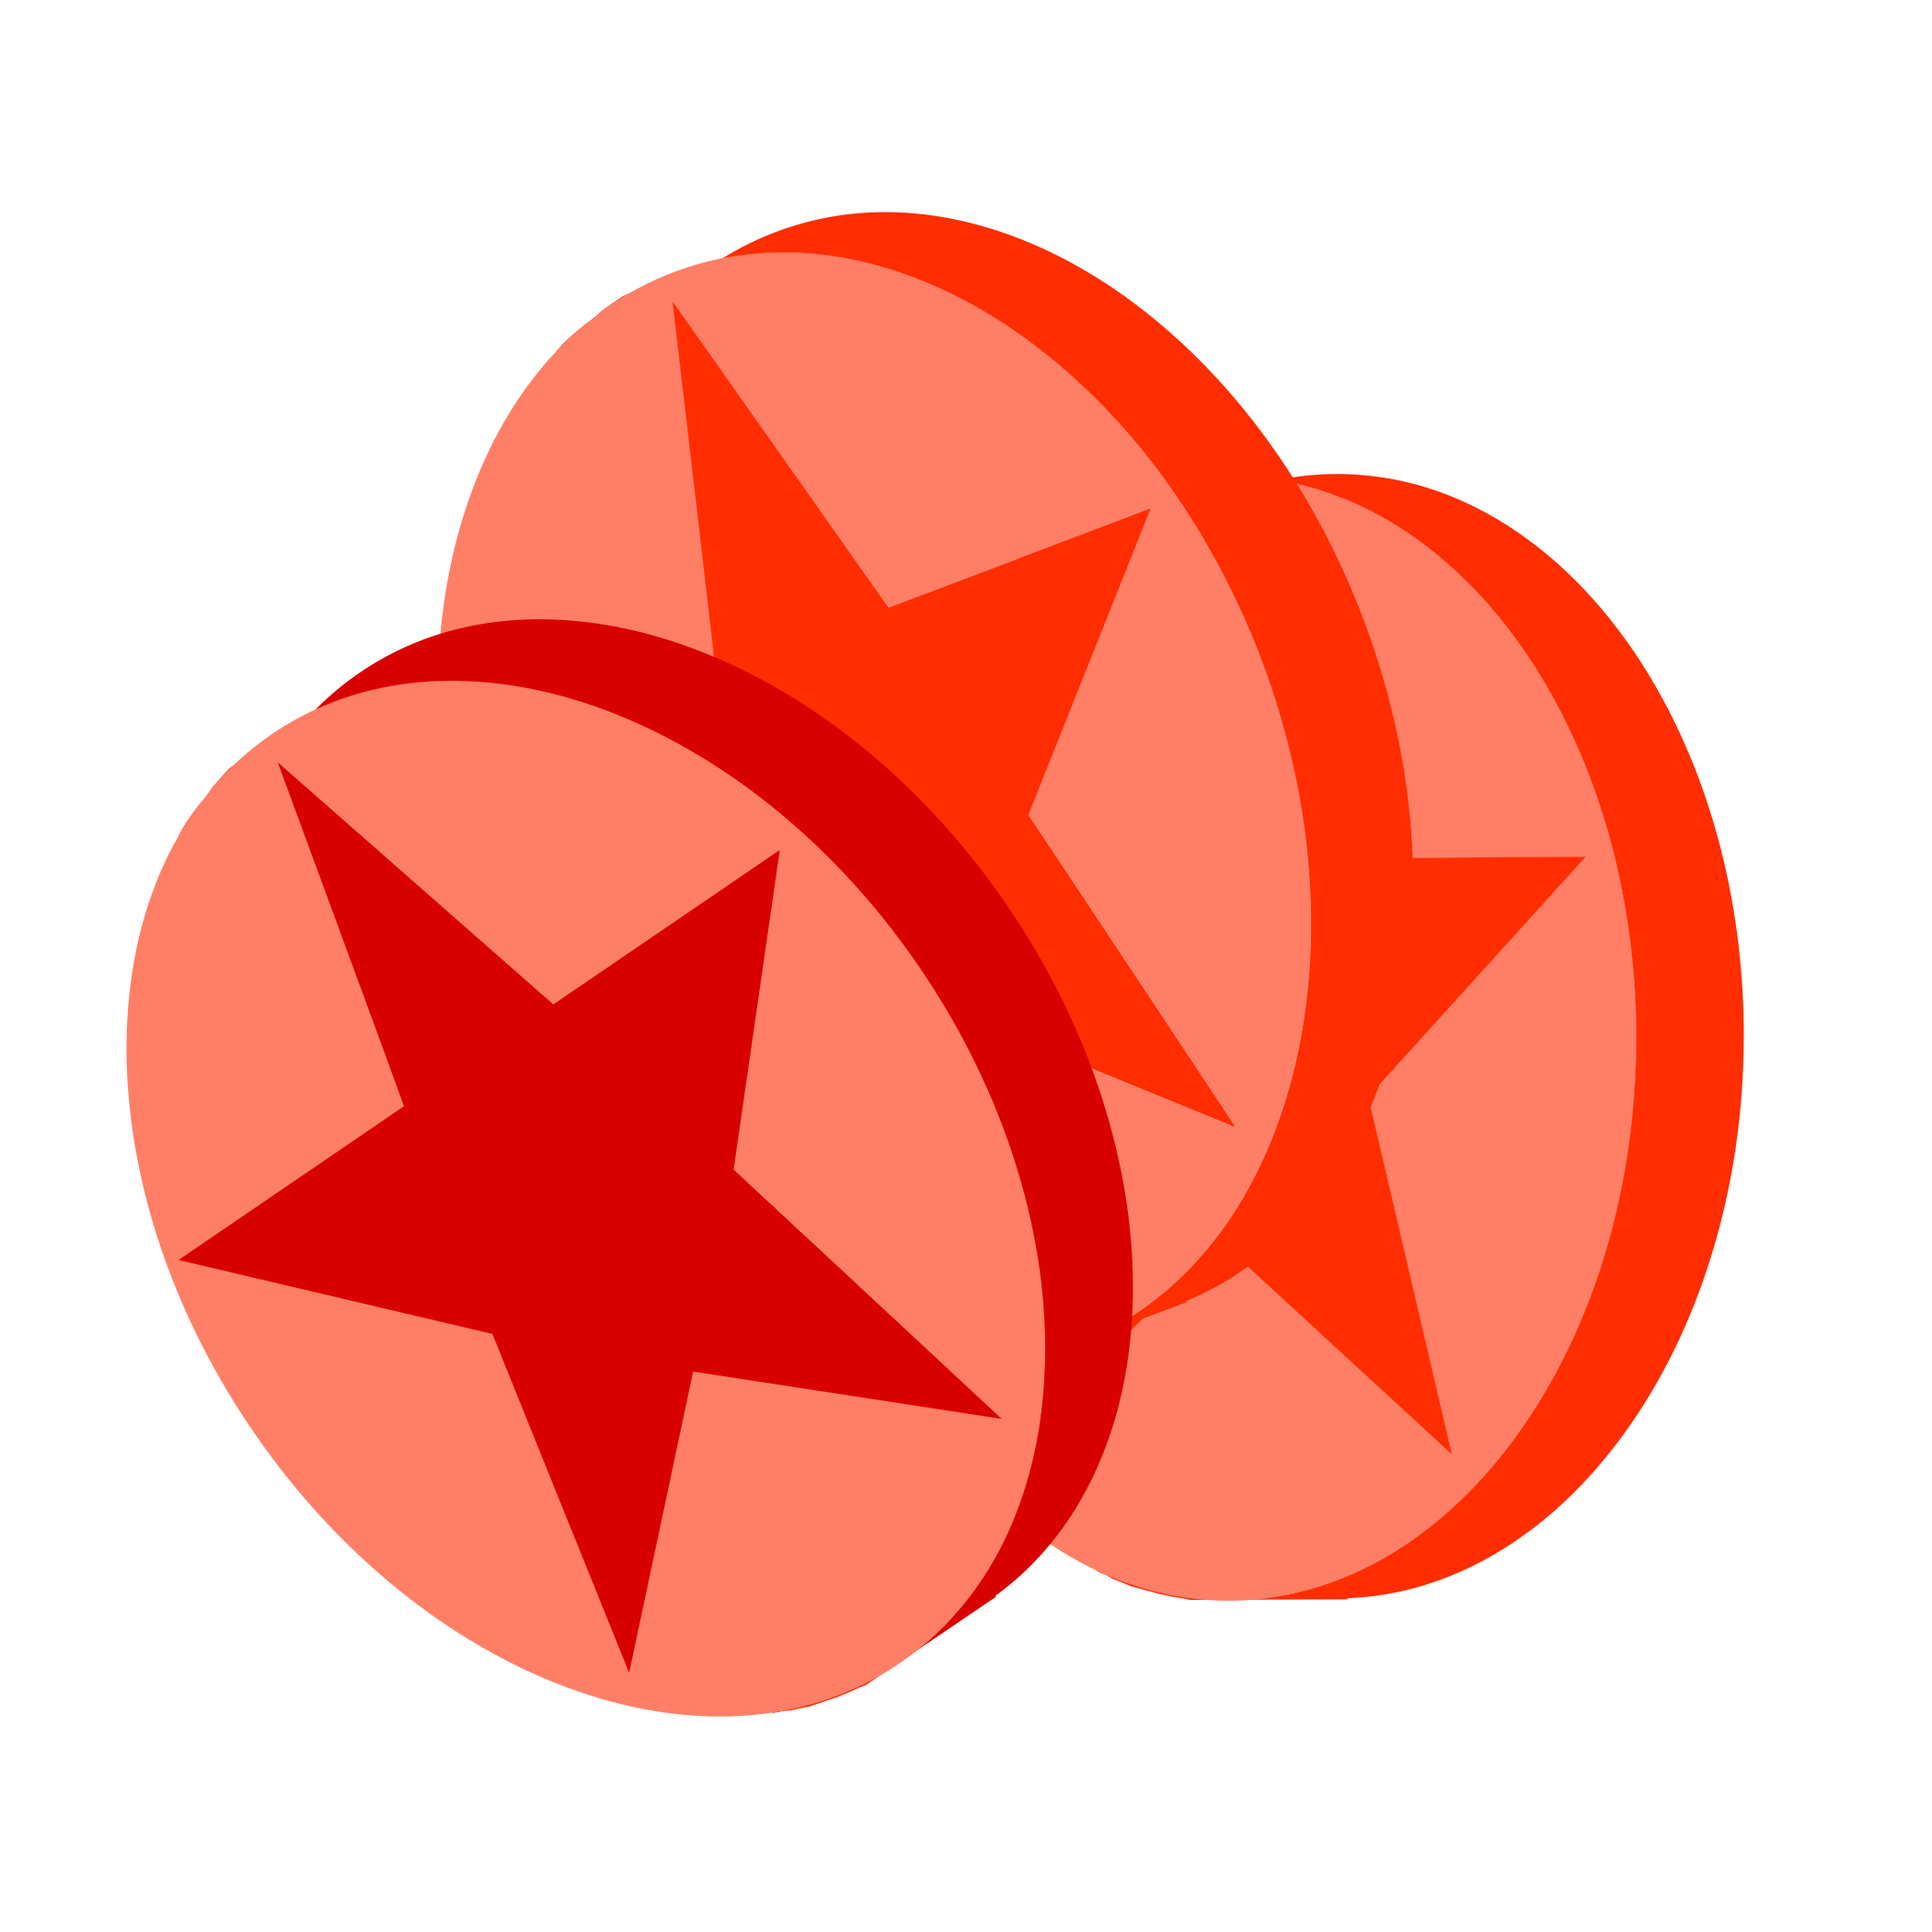

Supplement: Supplementary file 1 [file 1c153788756d35559c22d105d1182c30-Supplemental-Conference.zip › Supplementary Material/Code/src/macro_marl/my_env/overcooked/render/graphics/ChoppedTomato.png]

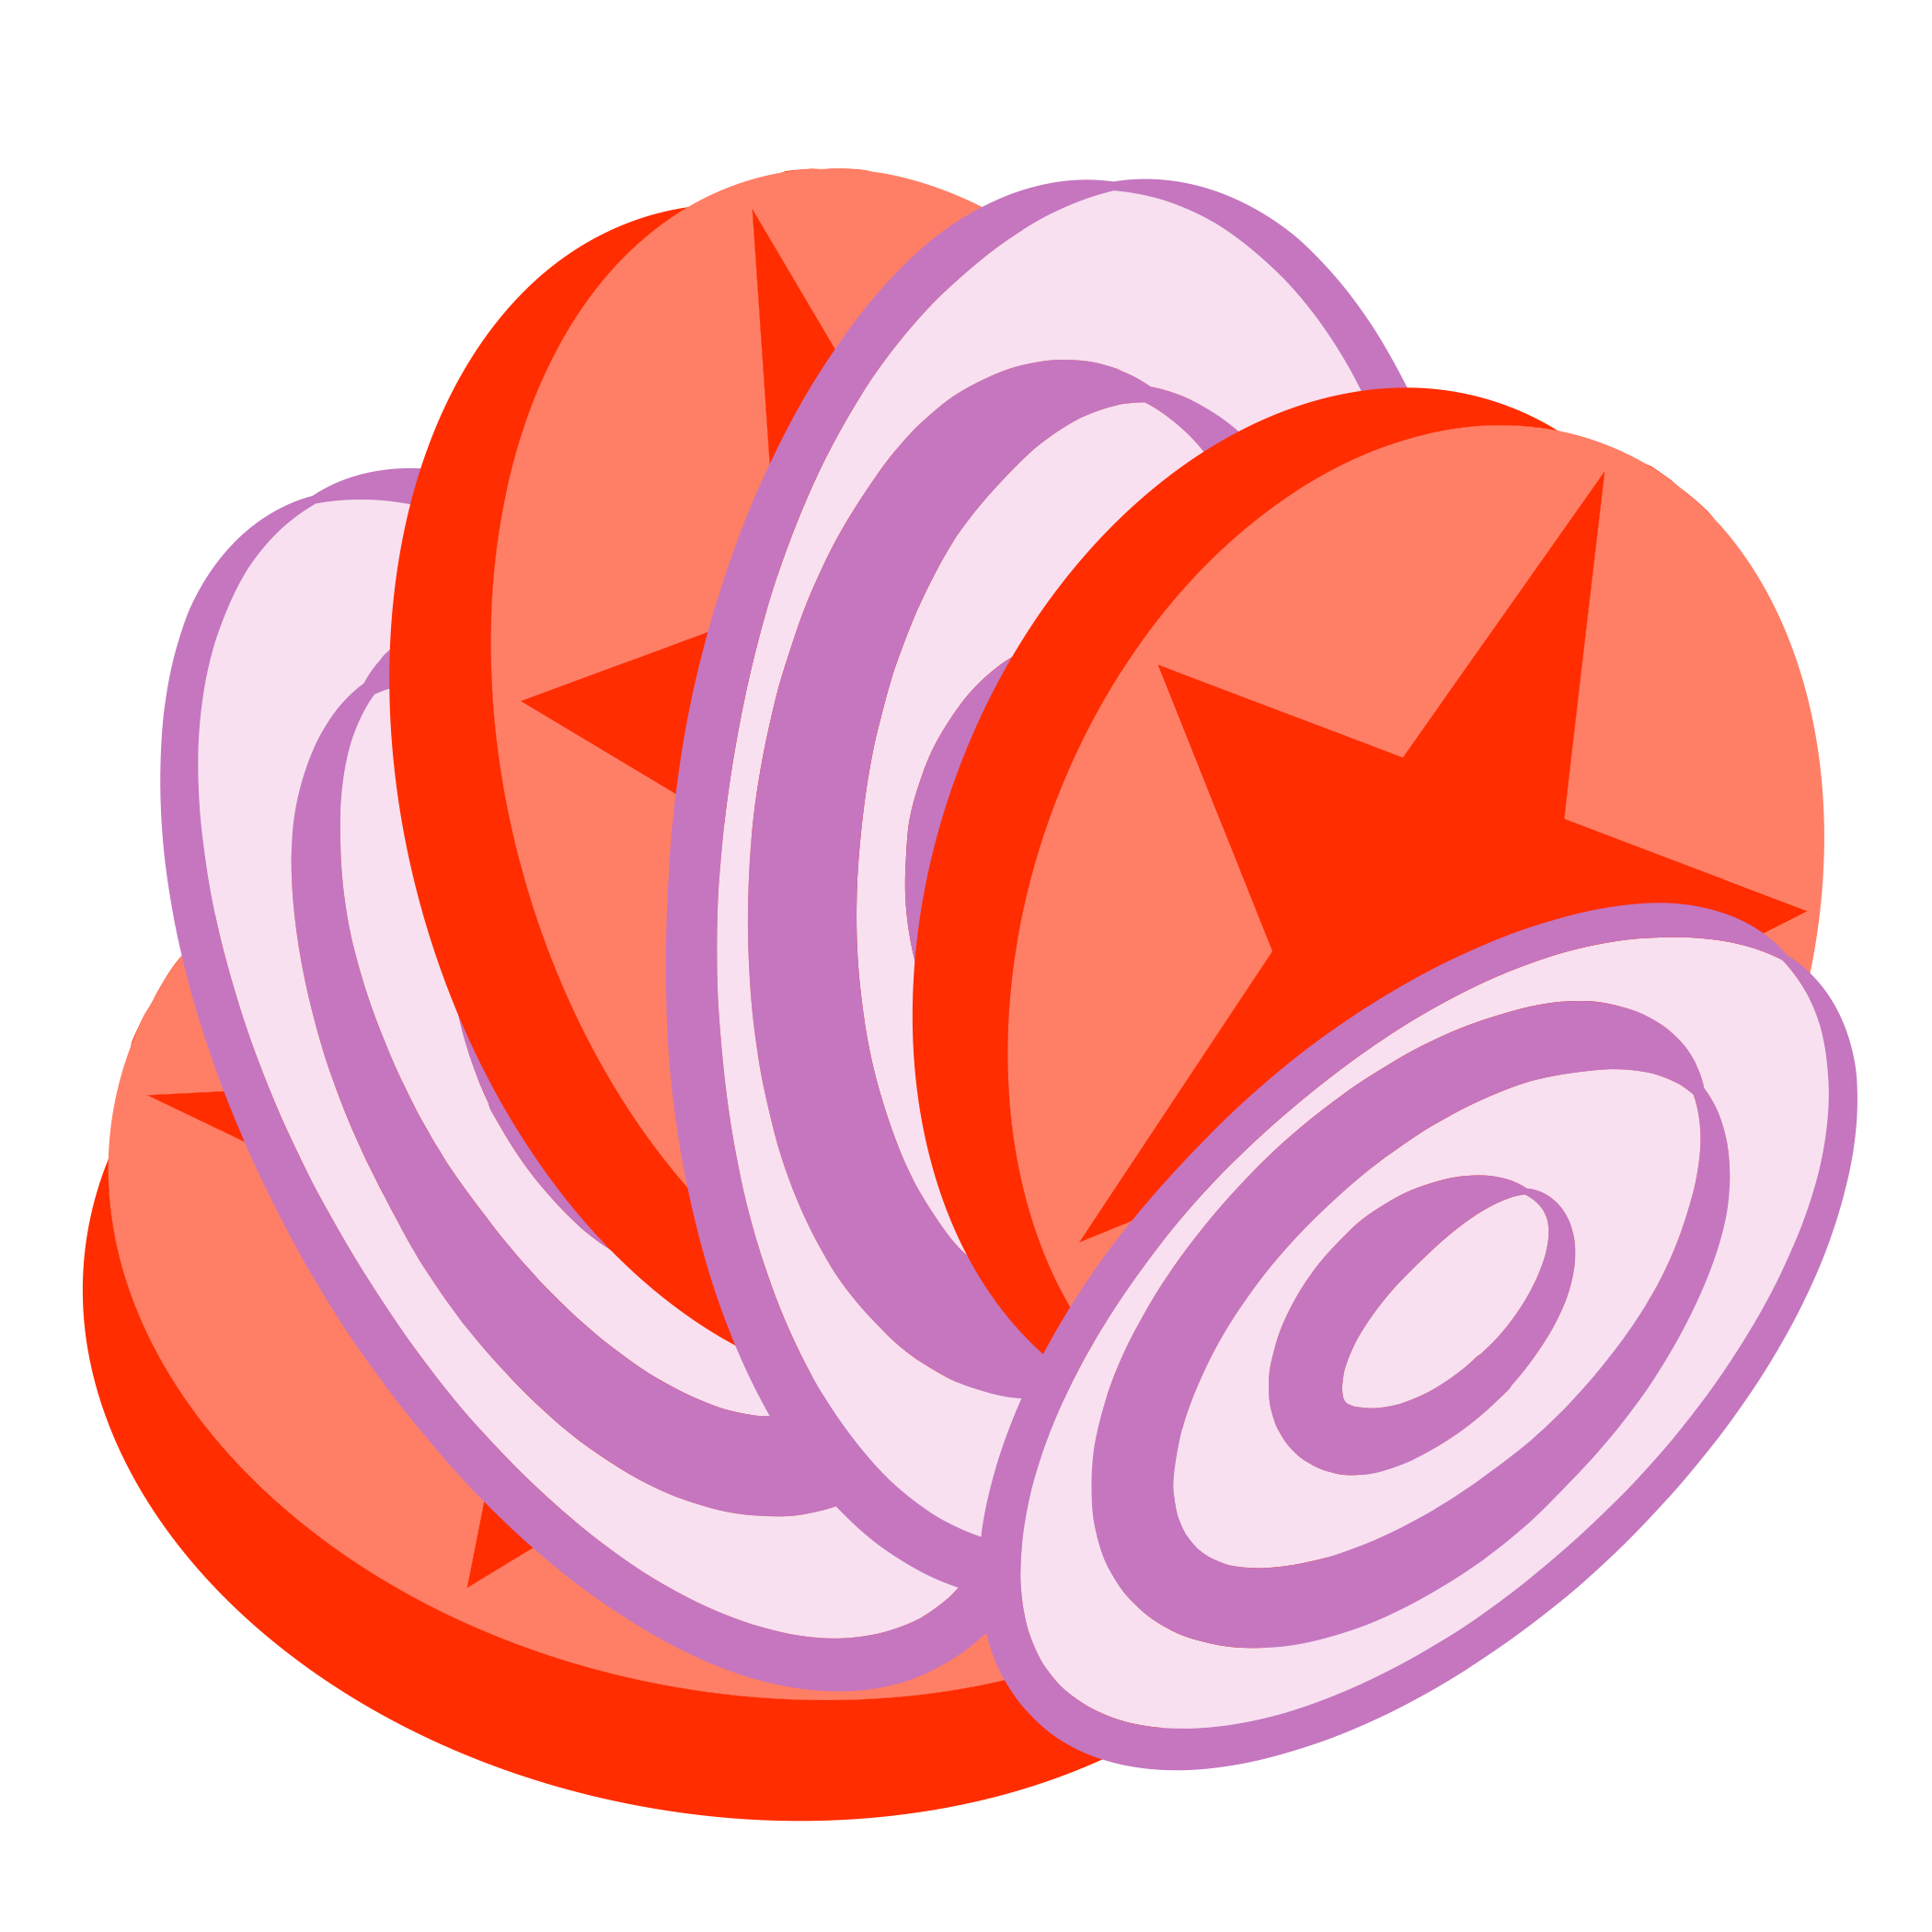

Supplement: Supplementary file 1 [file 1c153788756d35559c22d105d1182c30-Supplemental-Conference.zip › Supplementary Material/Code/src/macro_marl/my_env/overcooked/render/graphics/ChoppedOnion-ChoppedTomato.png]

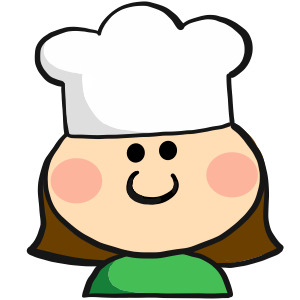

Supplement: Supplementary file 1 [file 1c153788756d35559c22d105d1182c30-Supplemental-Conference.zip › Supplementary Material/Code/src/macro_marl/my_env/overcooked/render/graphics/agent-green.png]
